# Supplementary material for: Human Fetal Astrocytes Infected with Zika Virus Exhibit Delayed Apoptosis and Resistance to Interferon: Implications for Persistence
Source: MDPI journal article supplement (doi:10.3390/v10110646), 2018-11-17

Figure S1

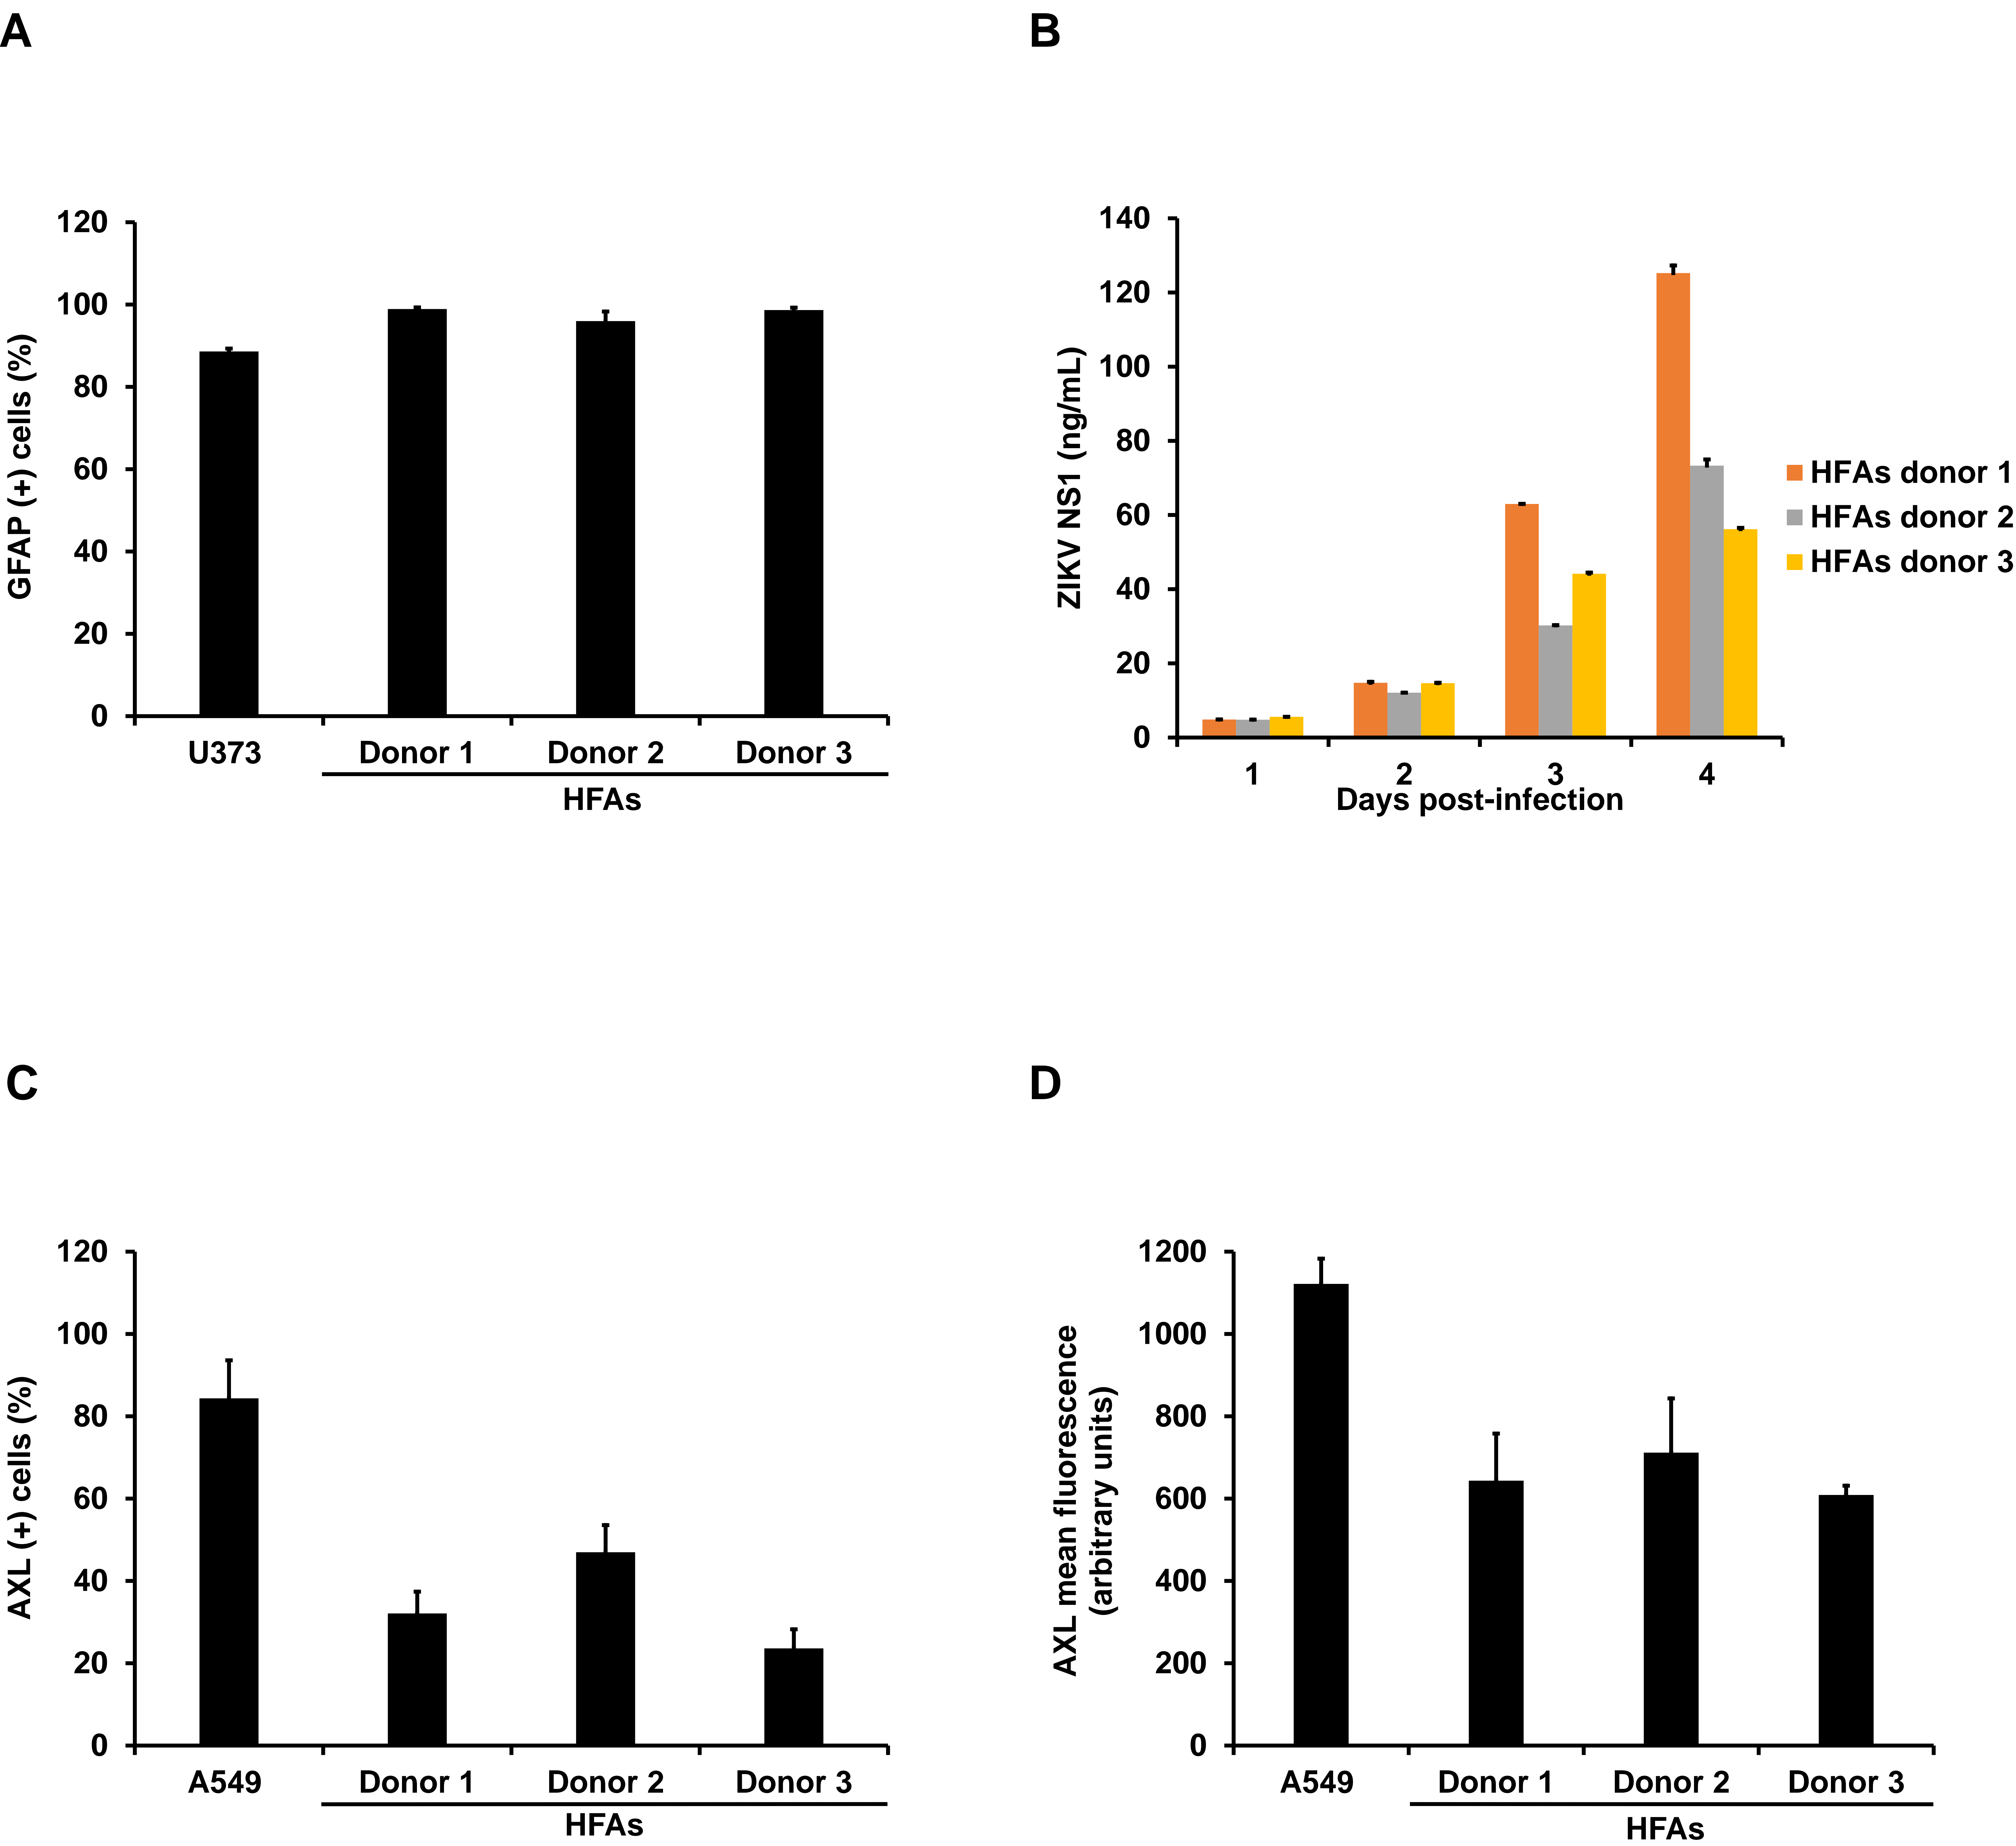



Figure S2

A

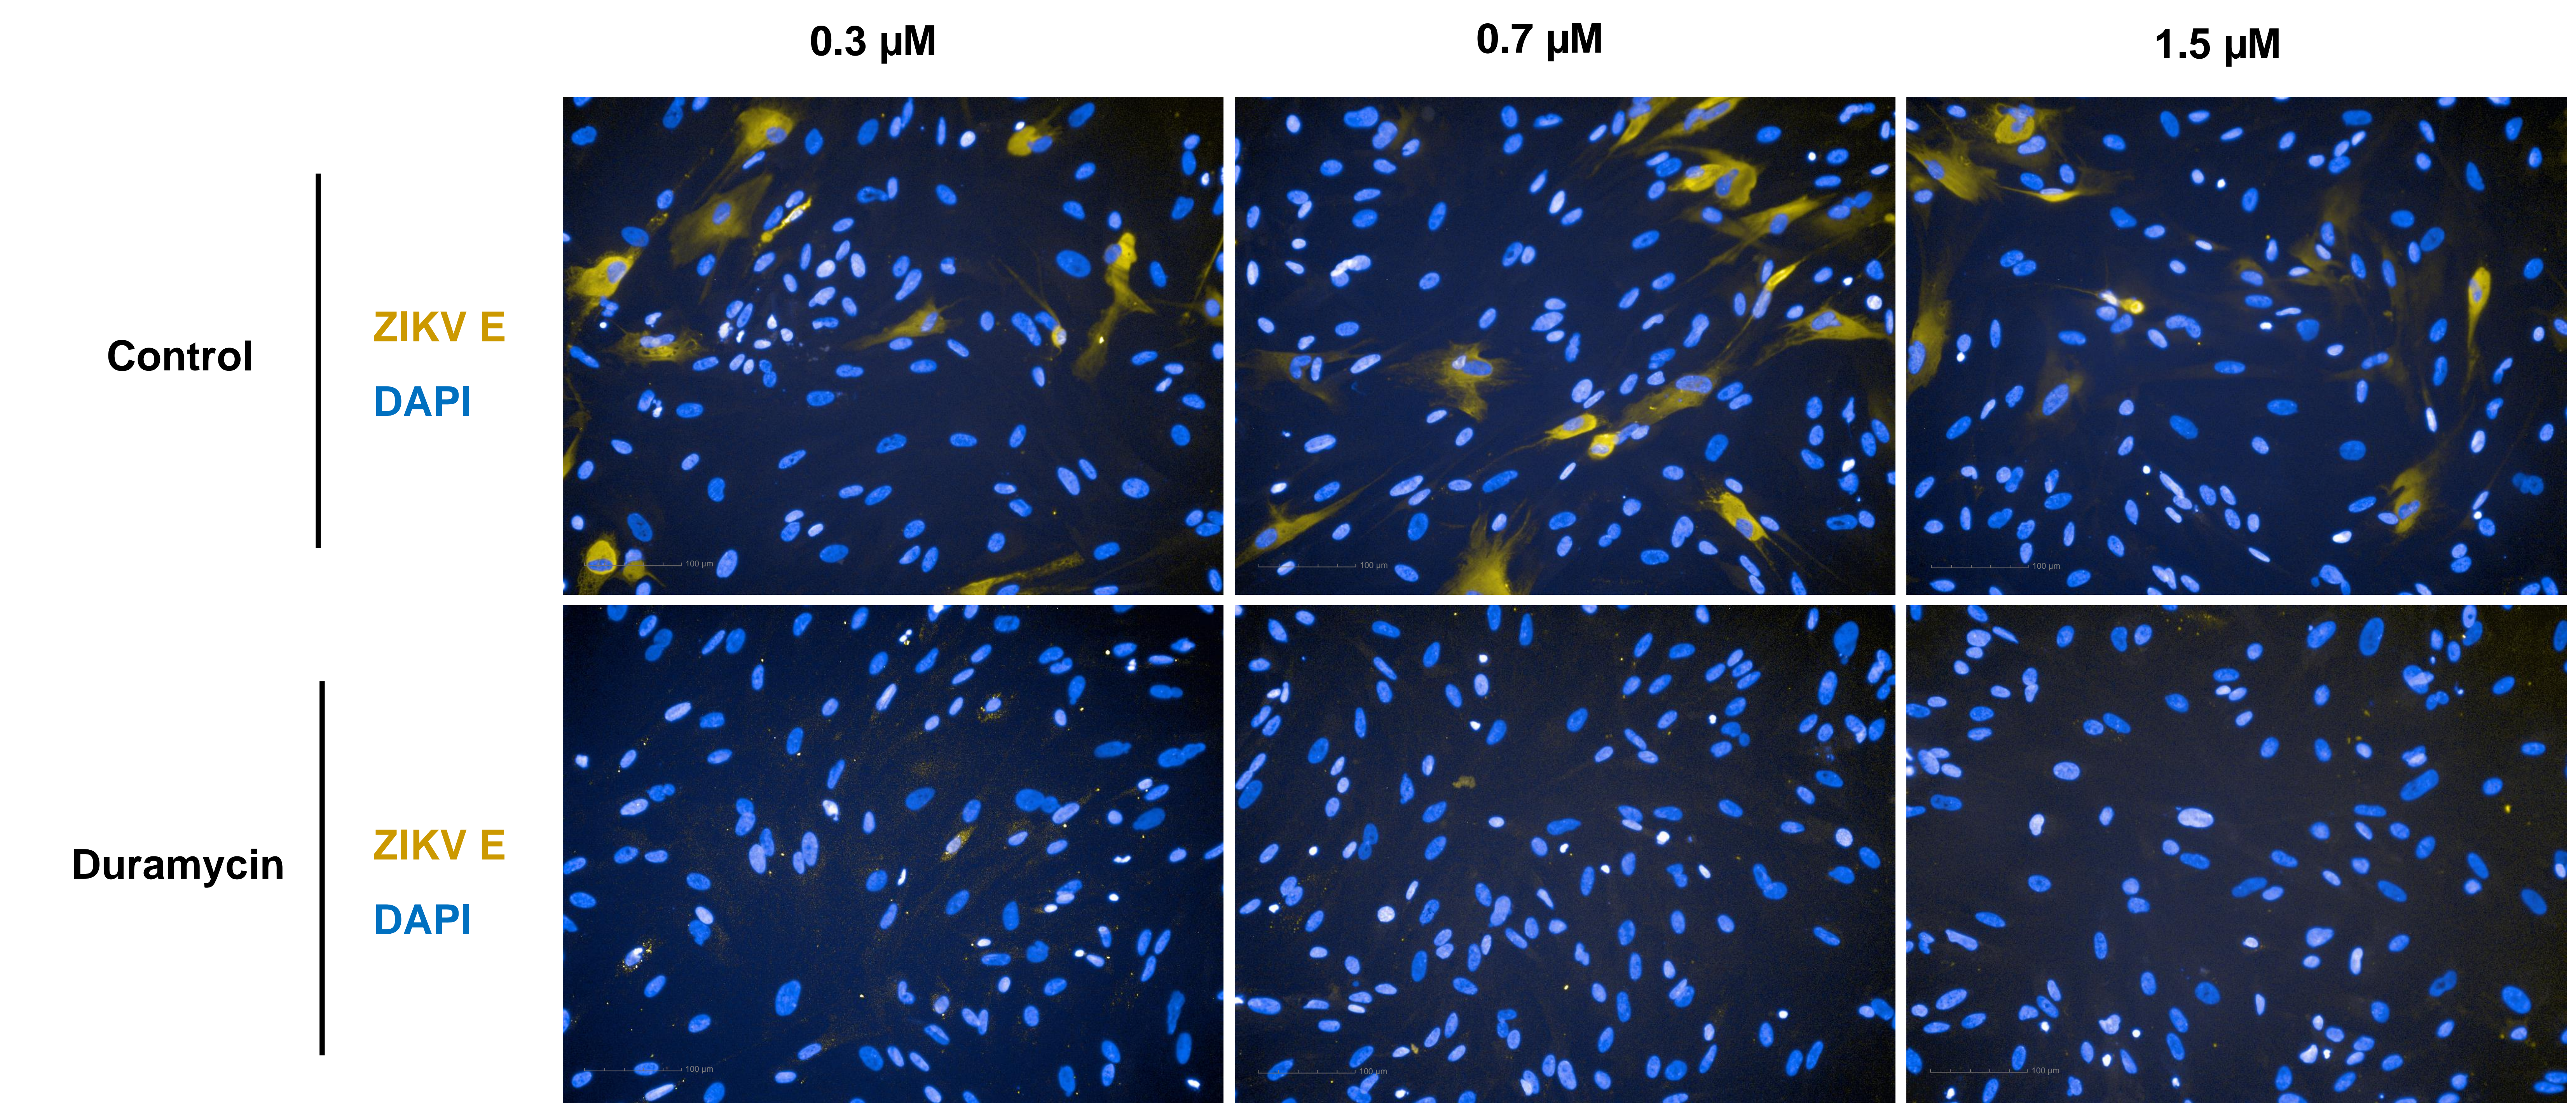

B

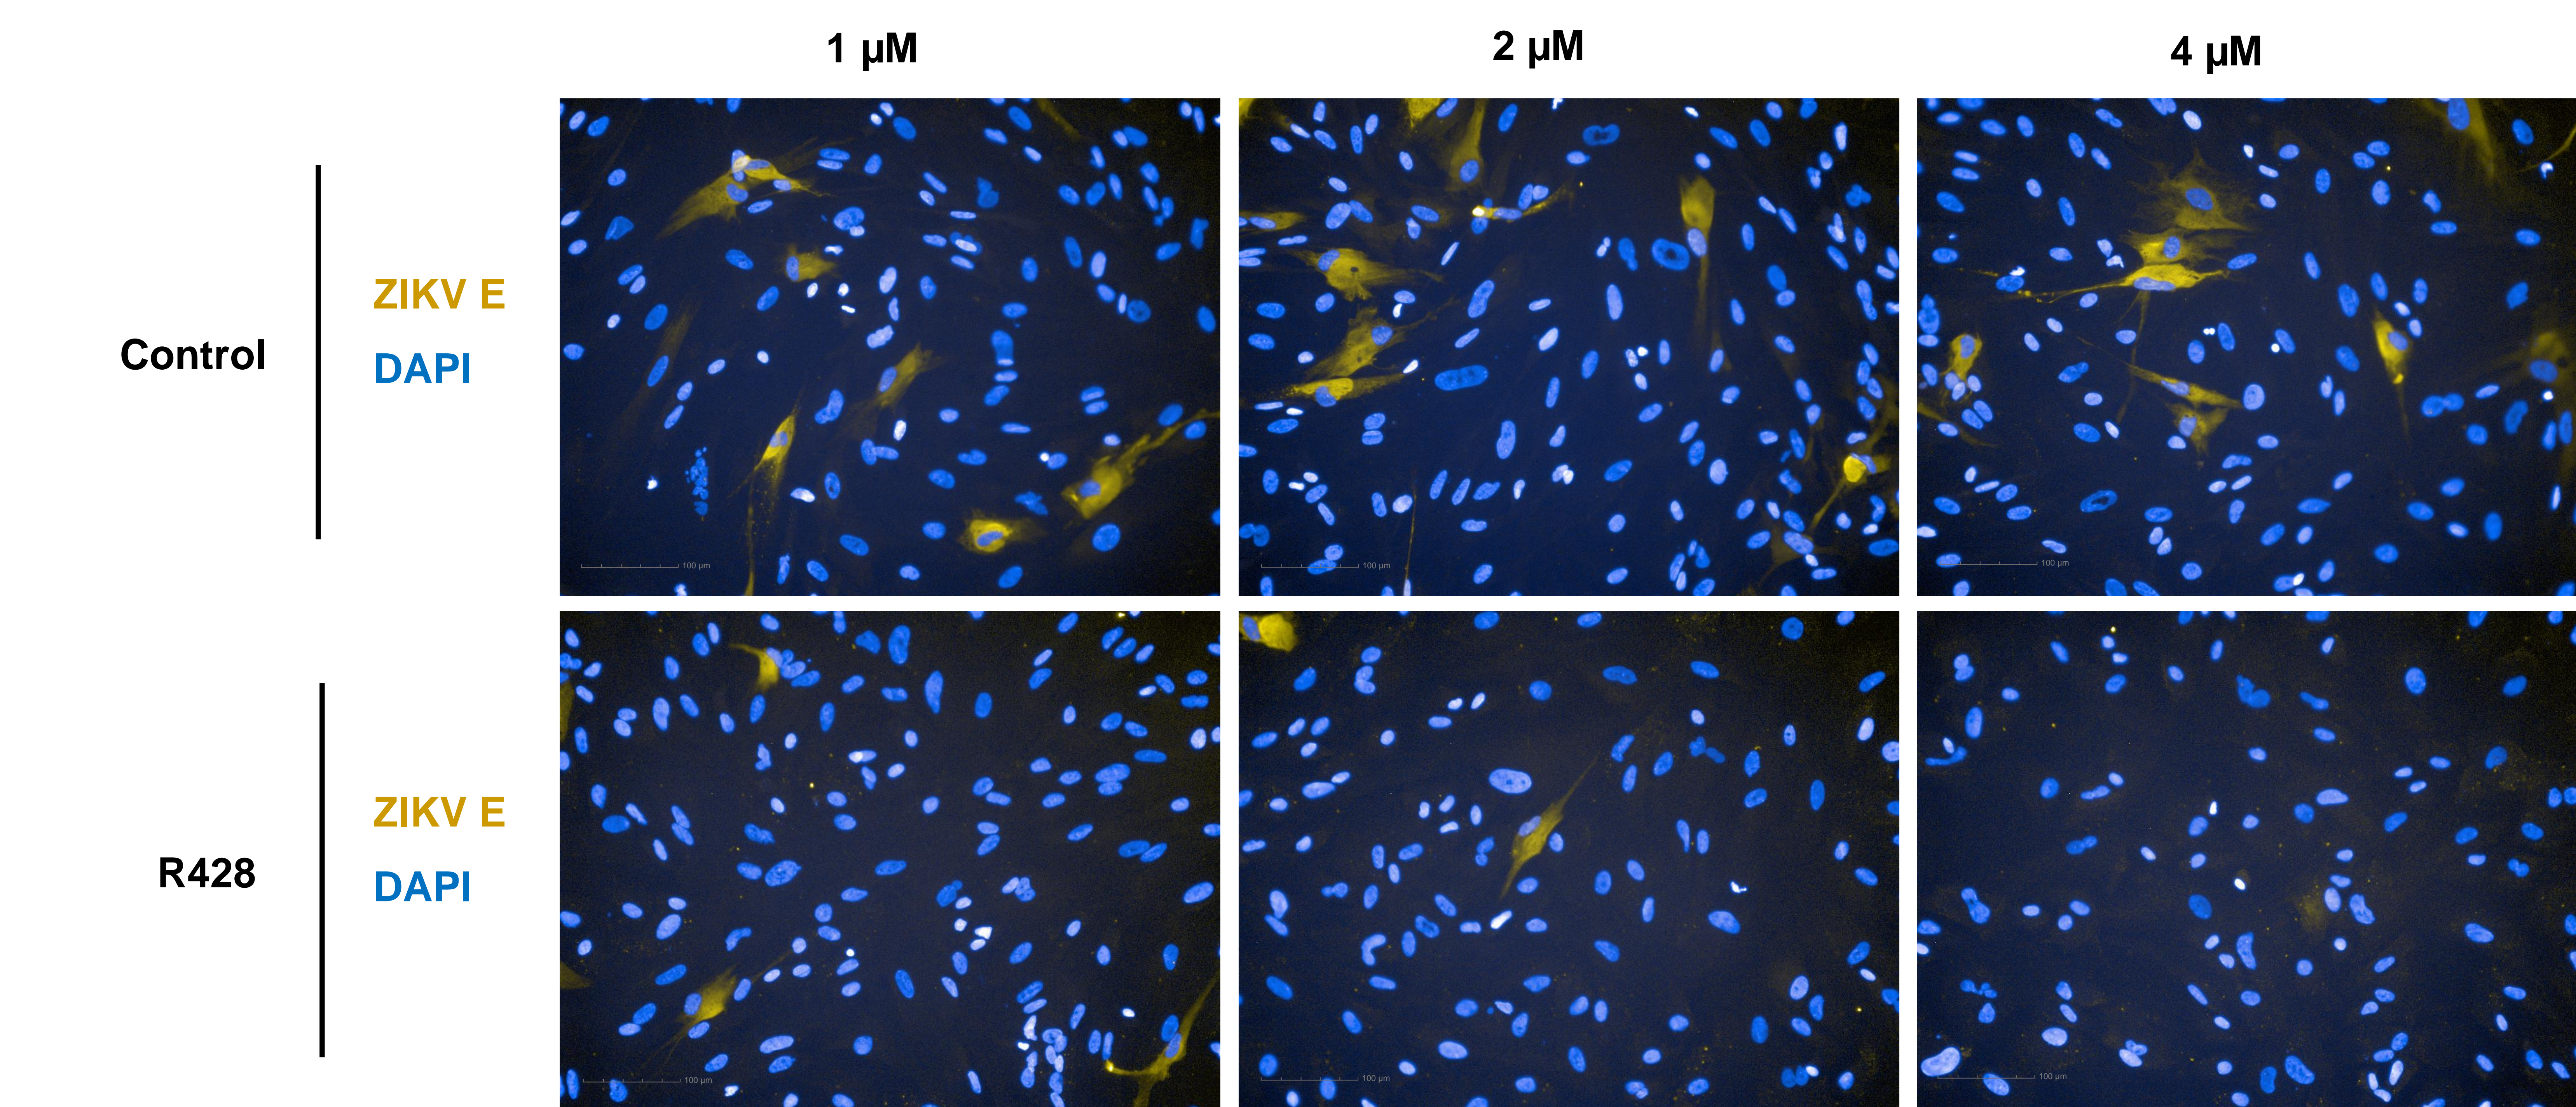



Figure S3

A

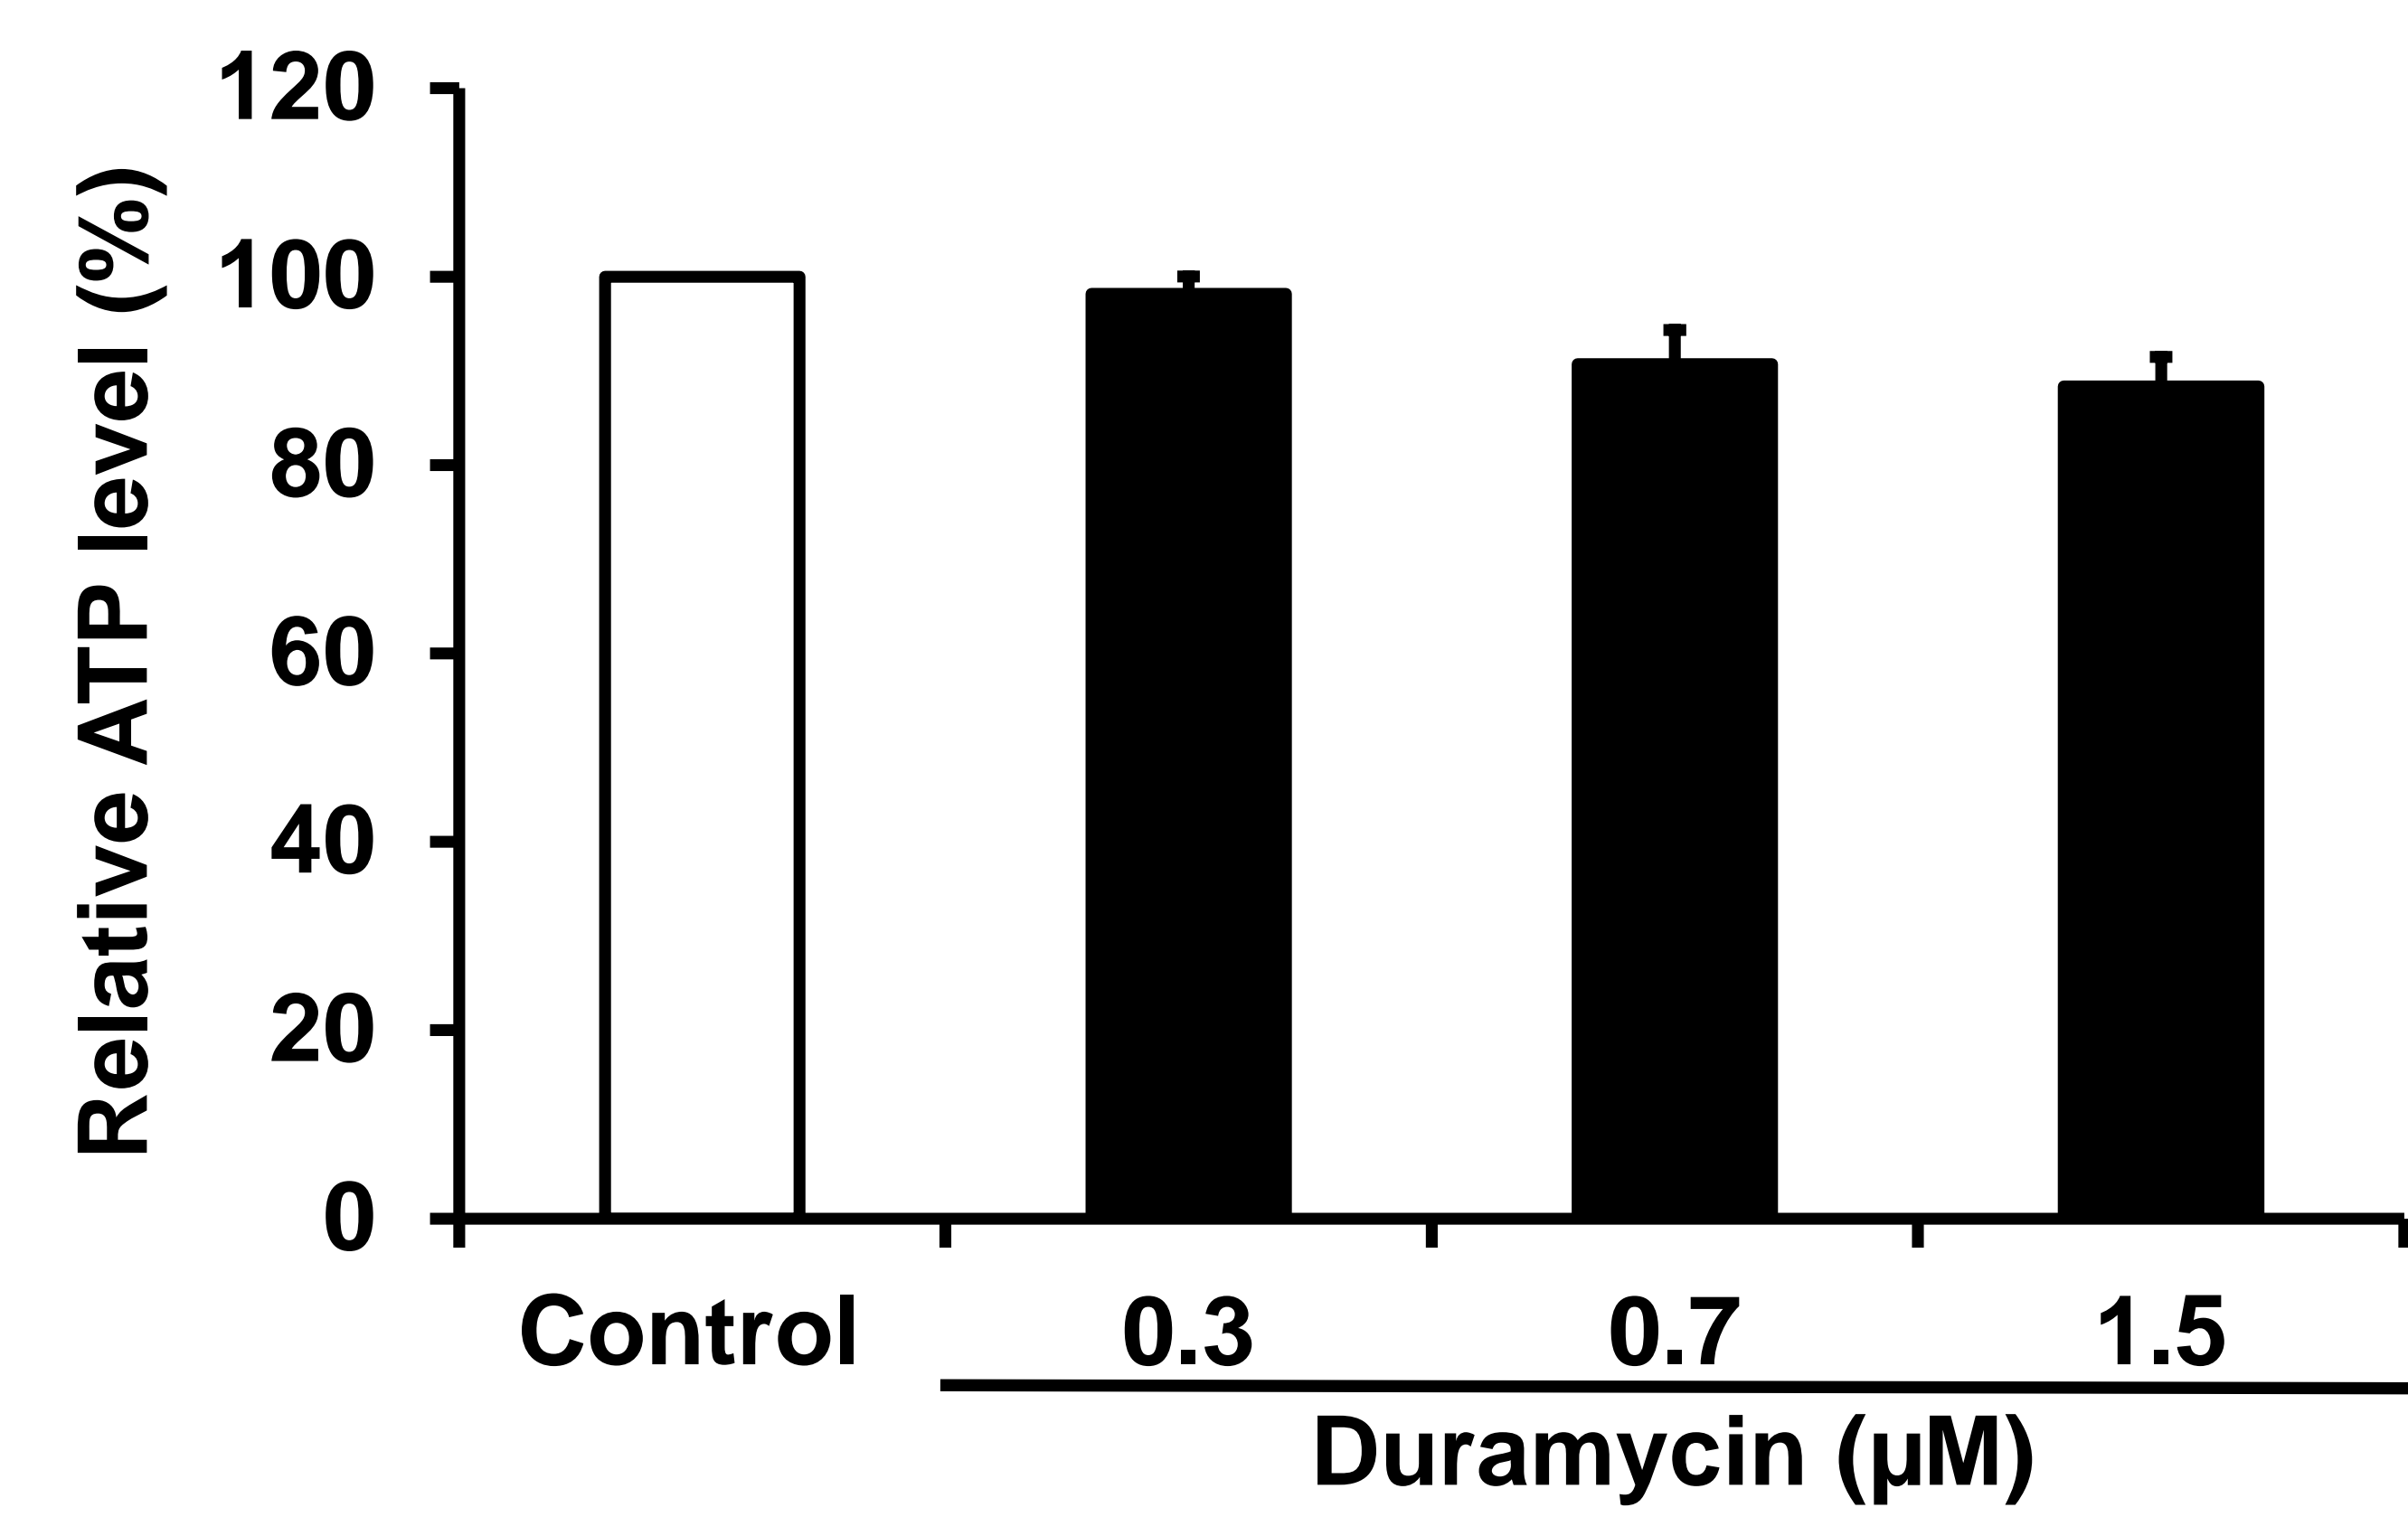

B

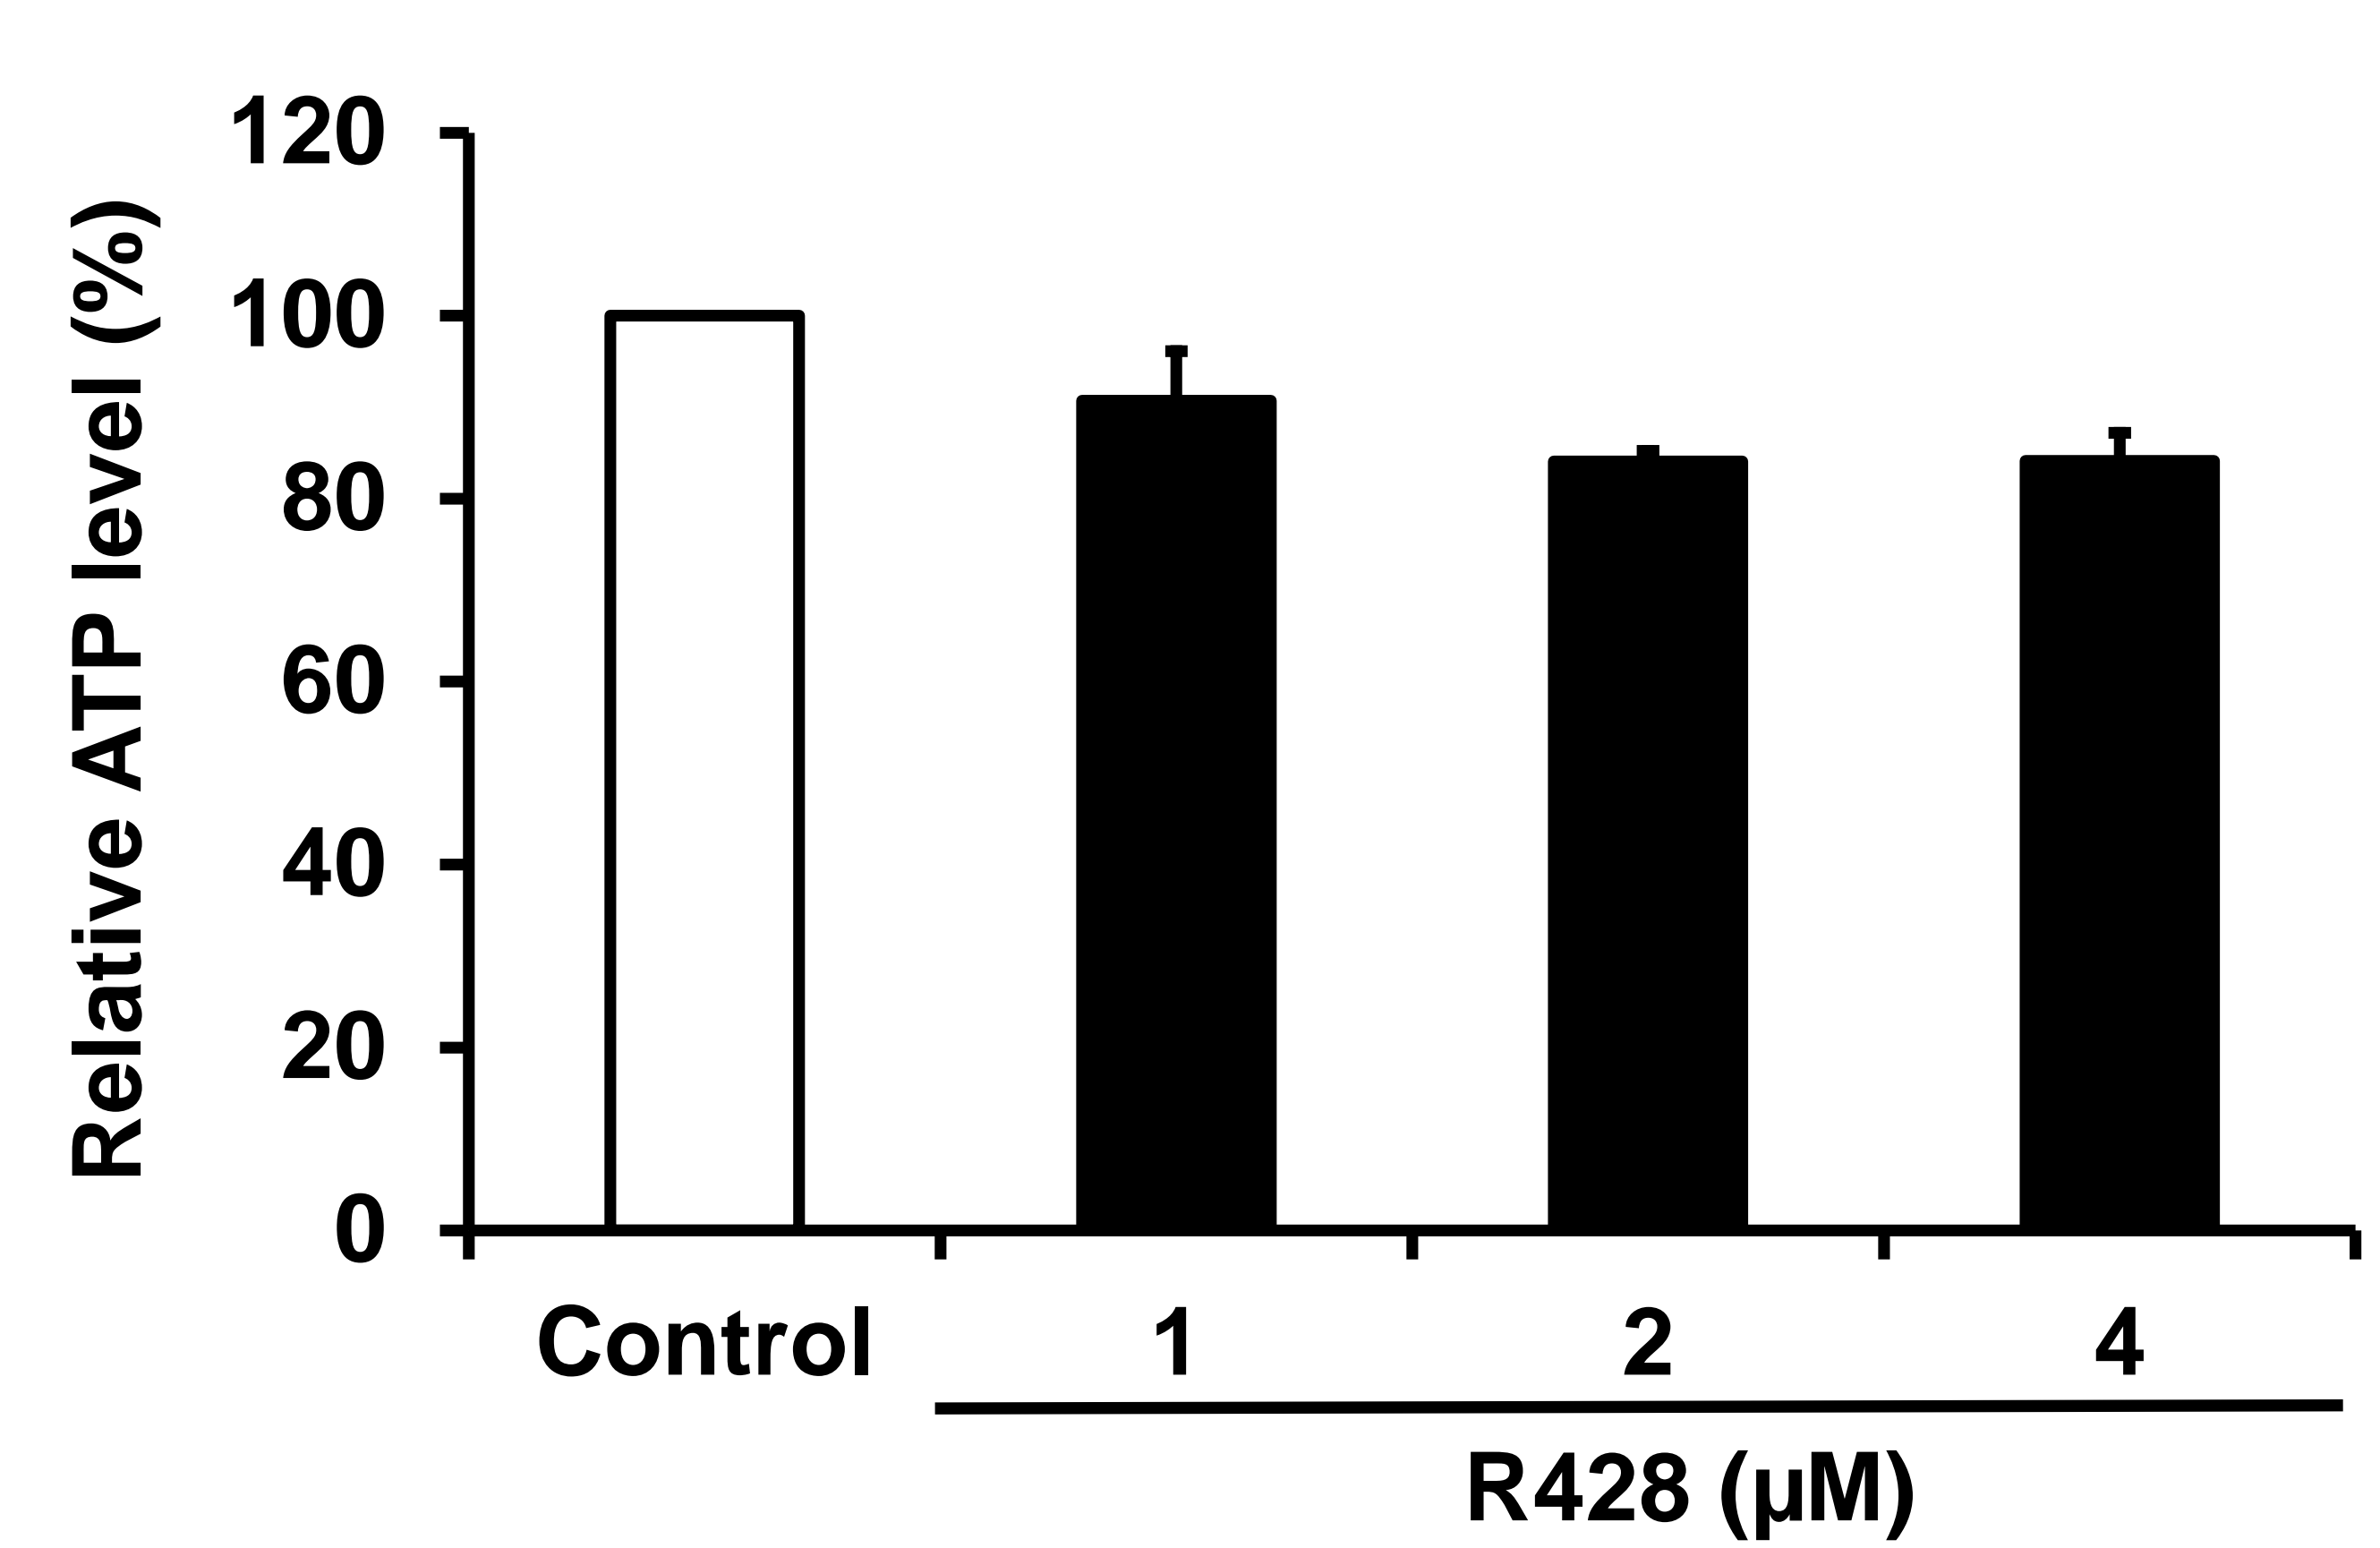

C

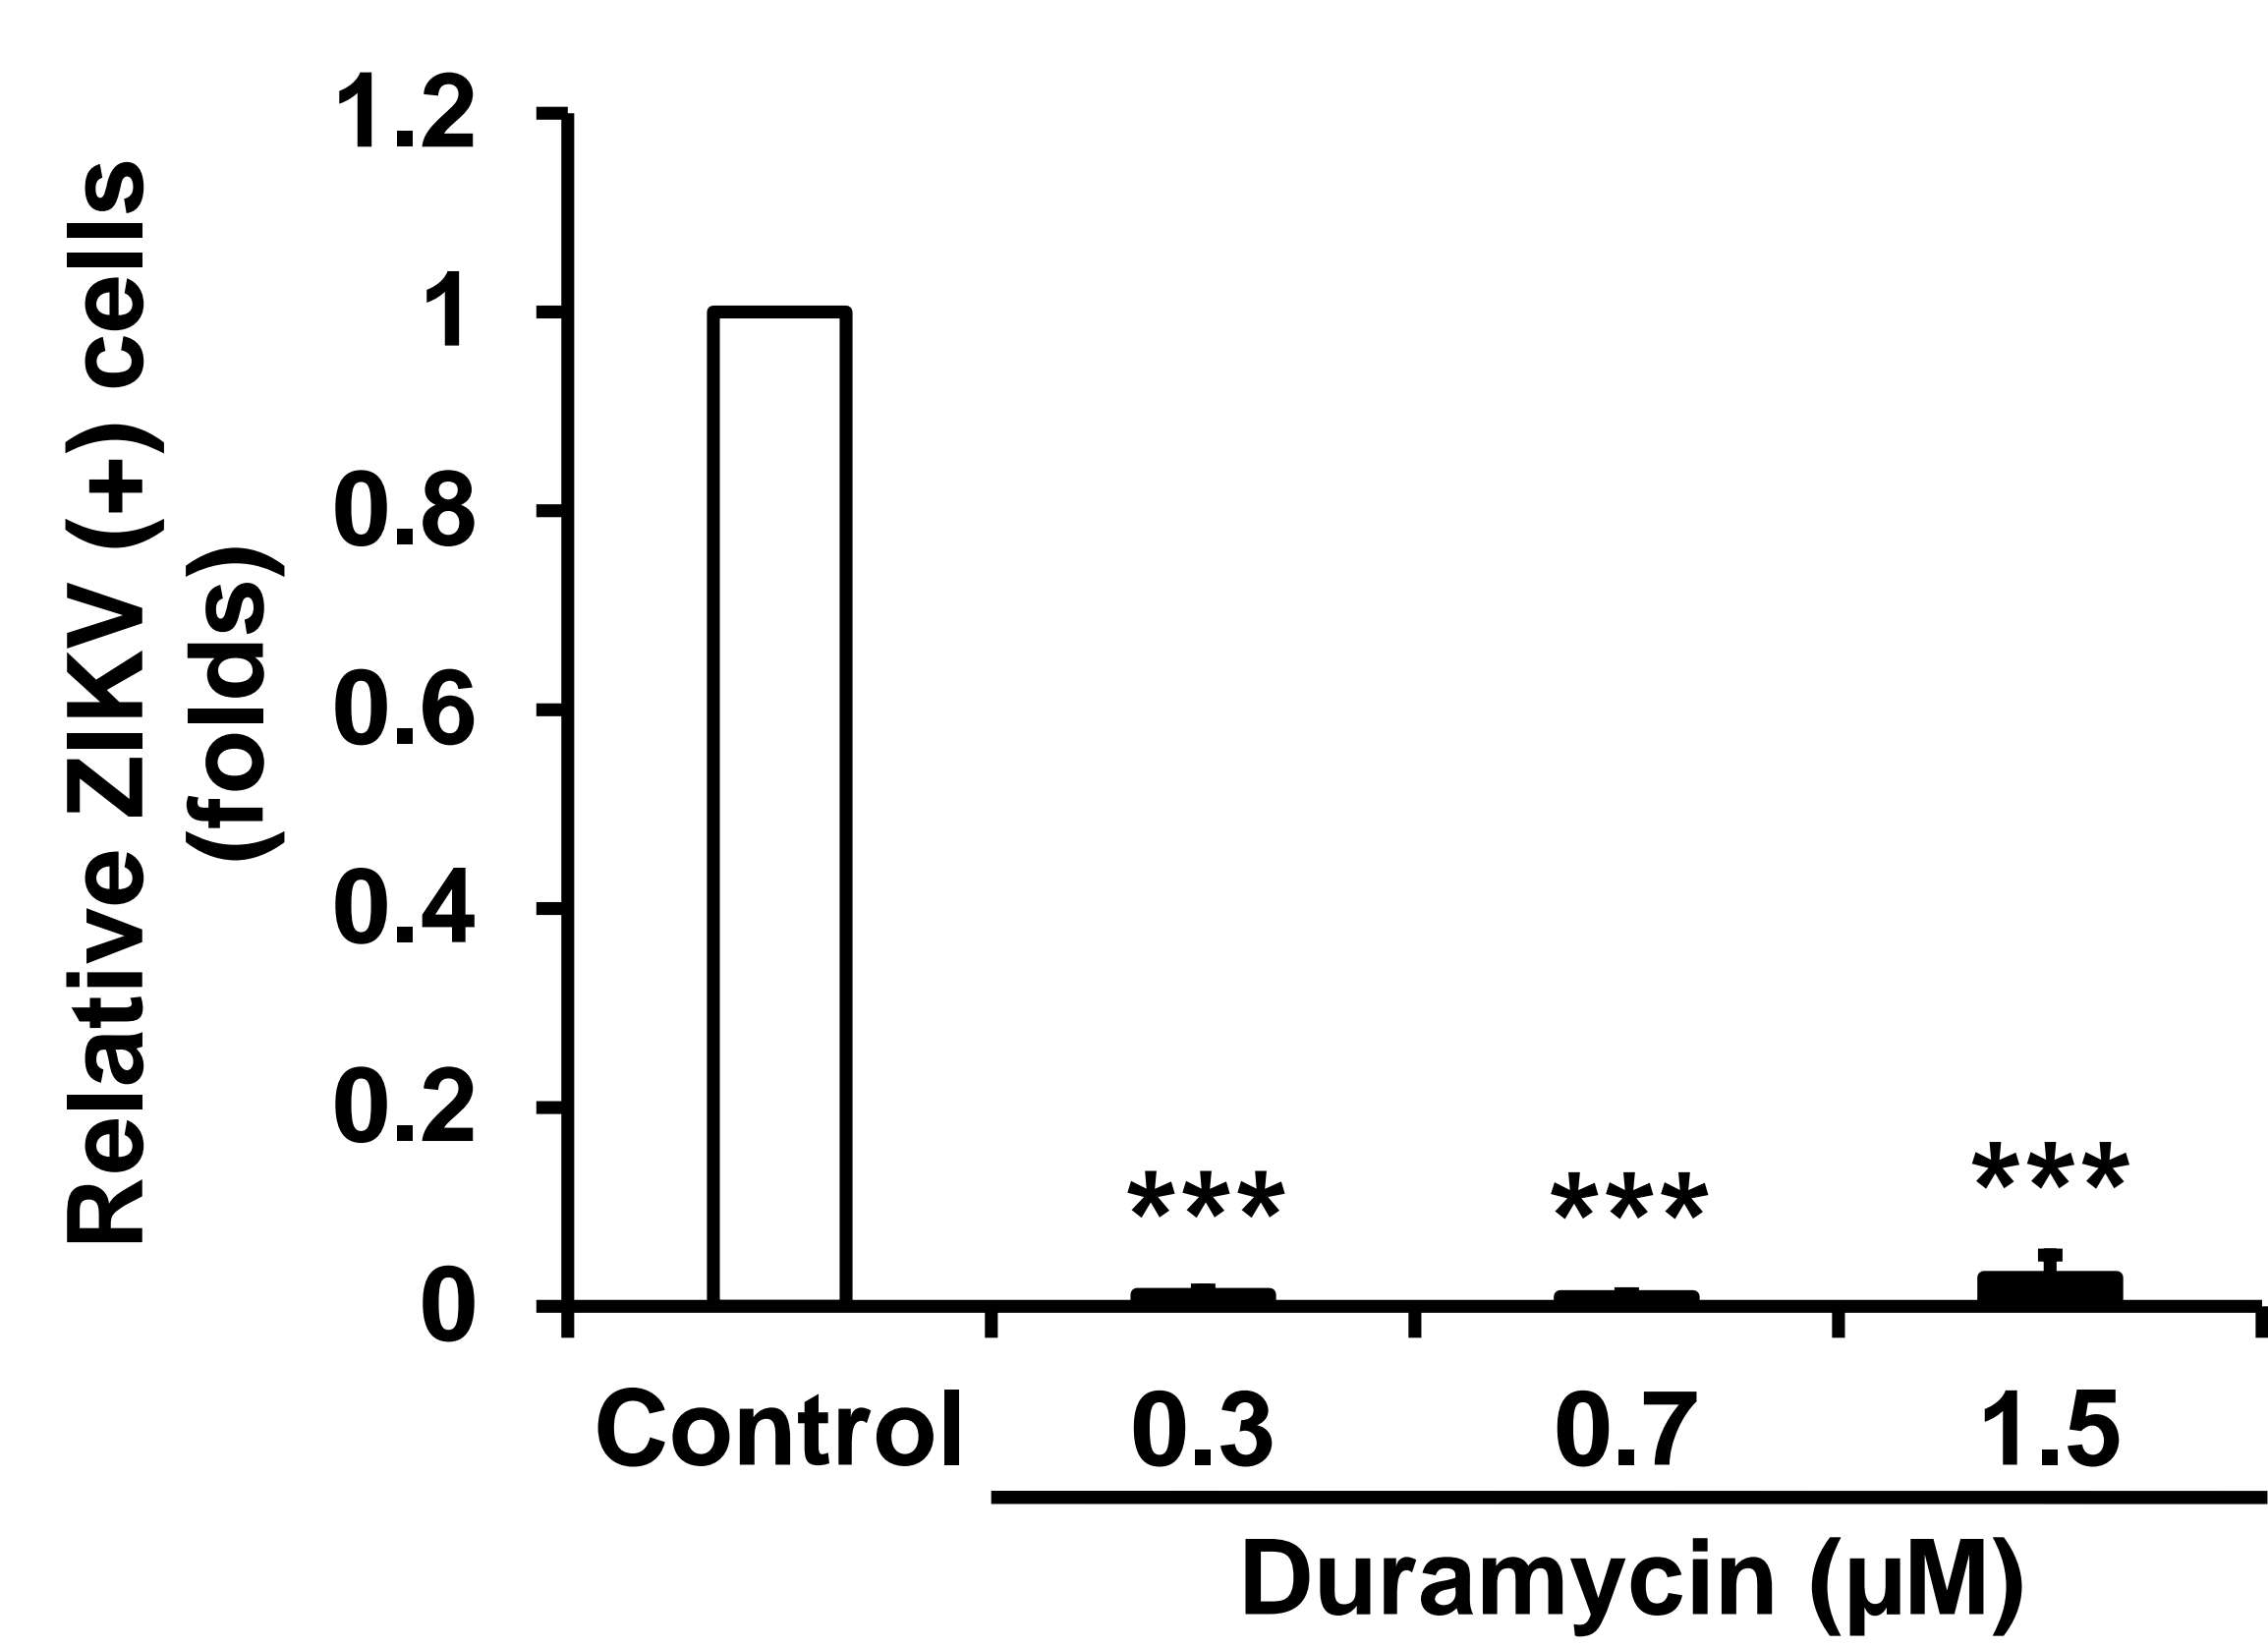

D

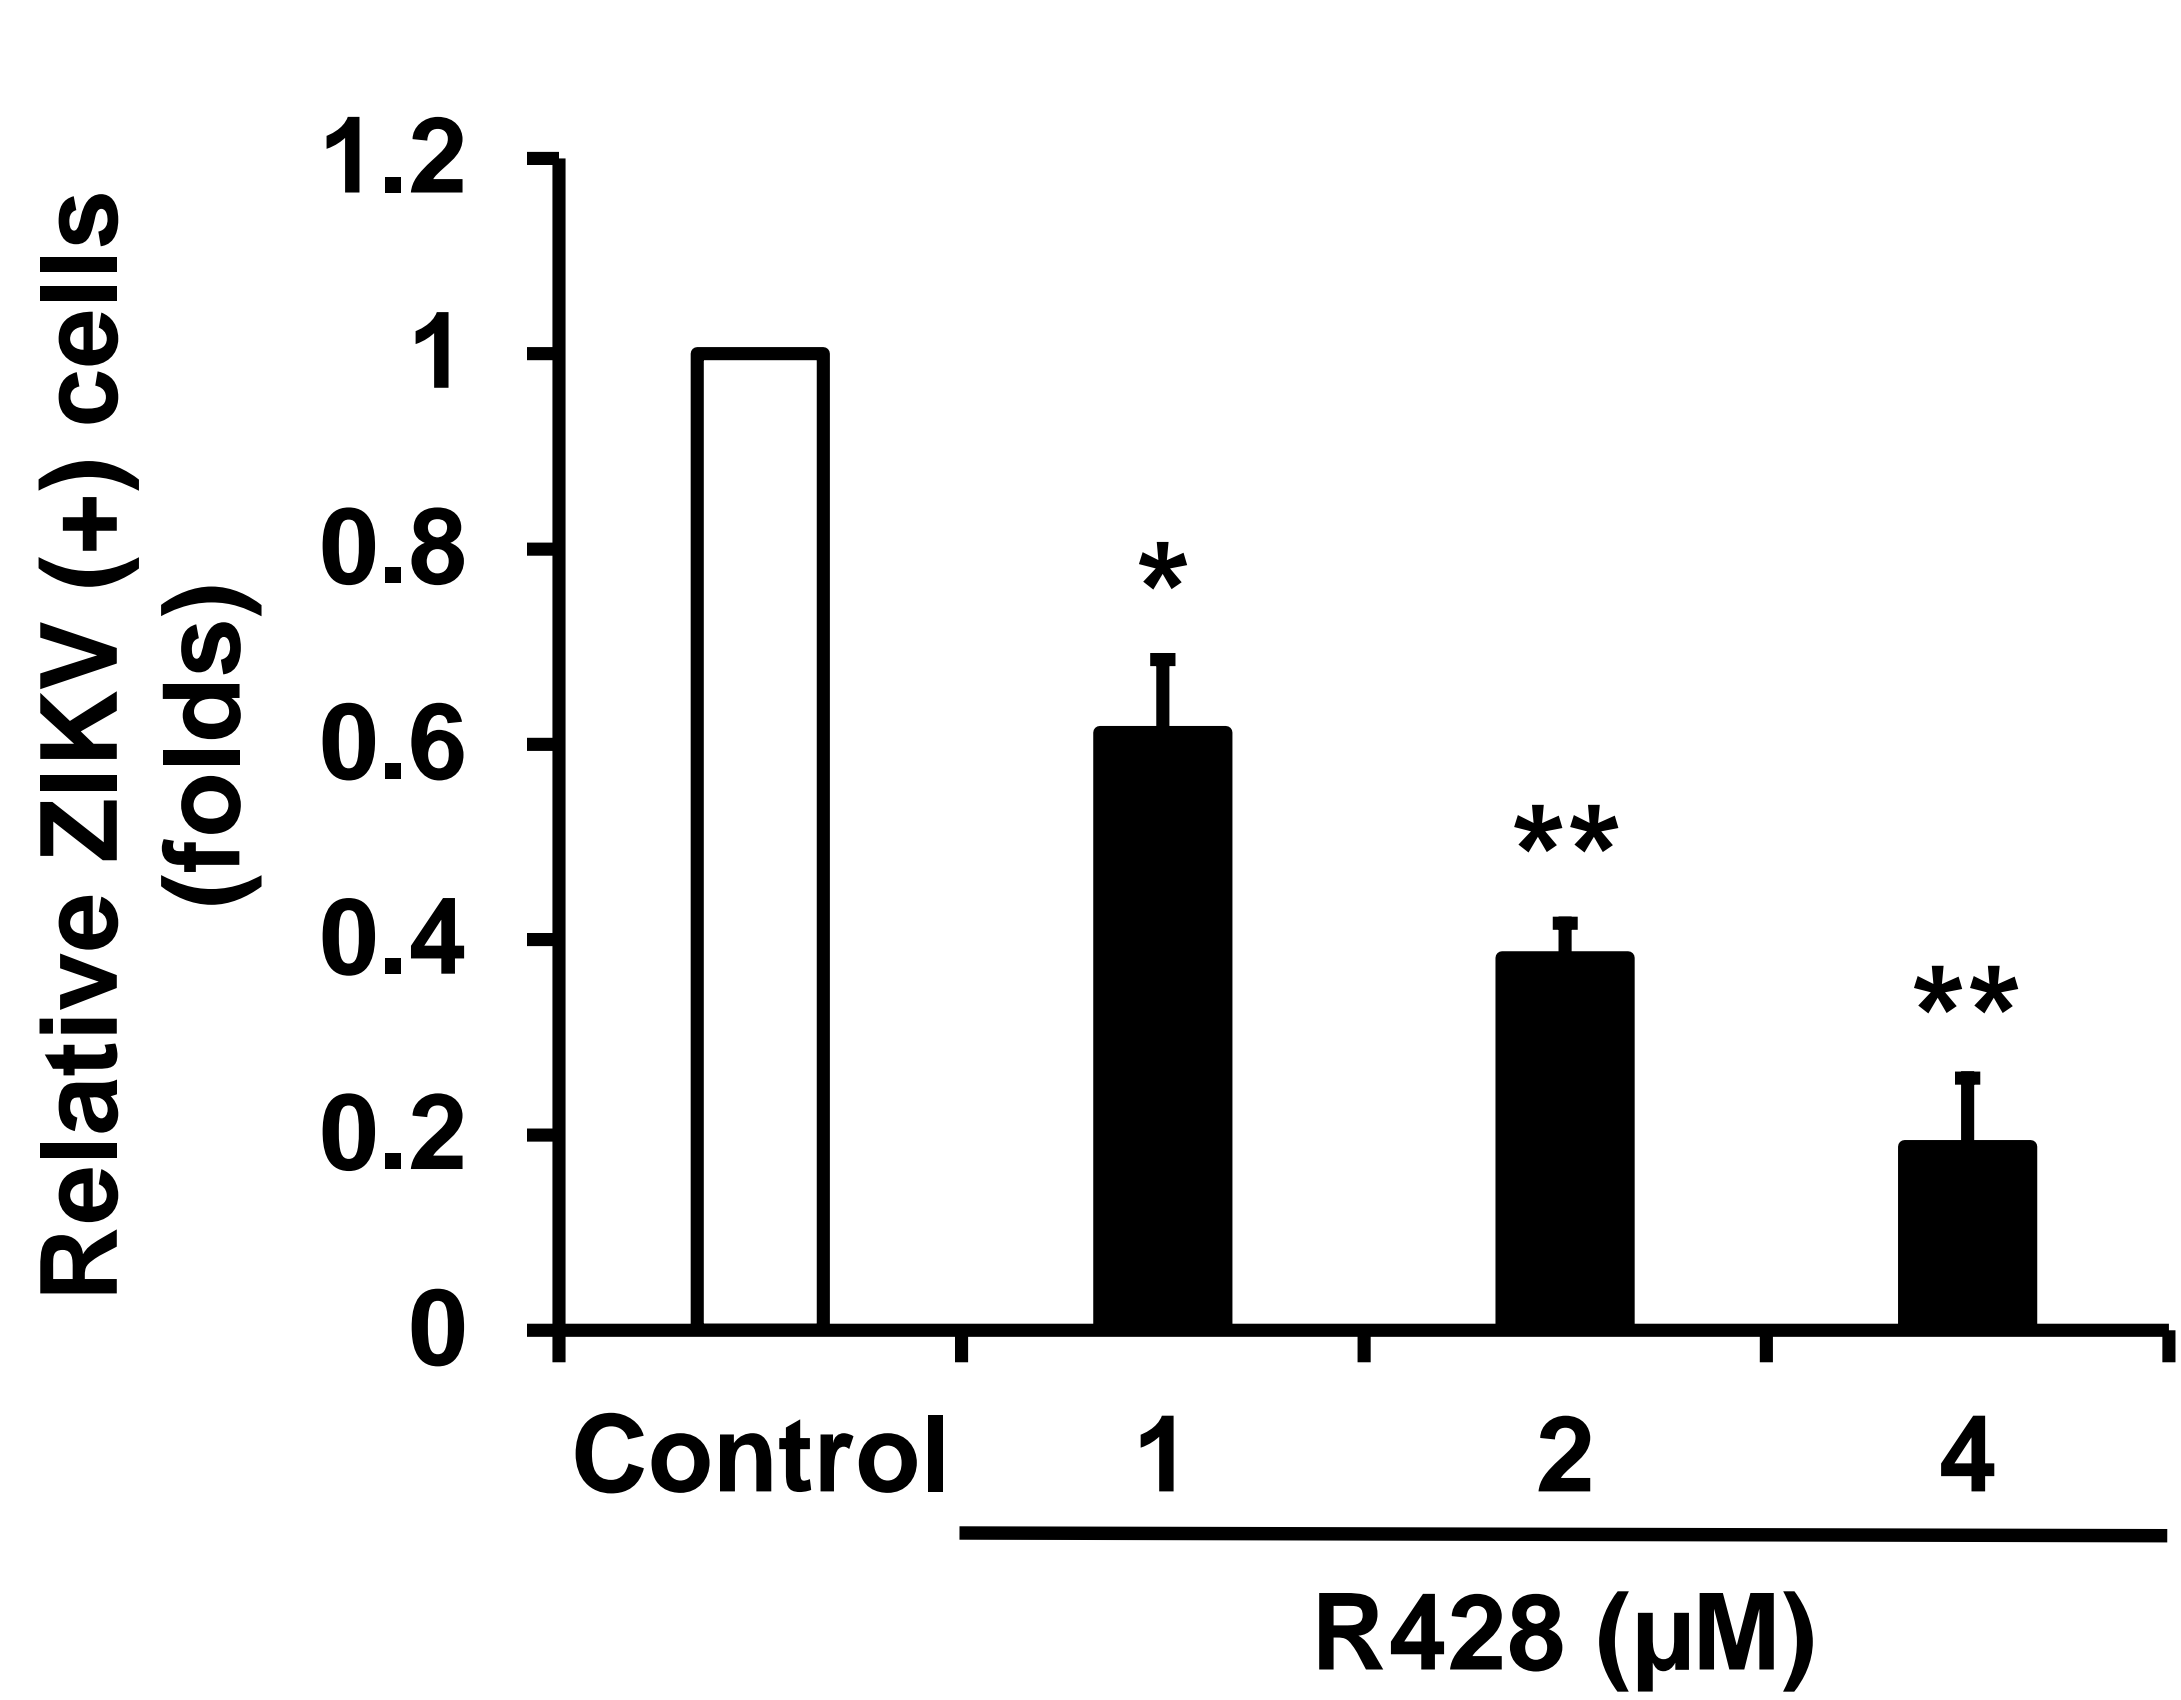

E

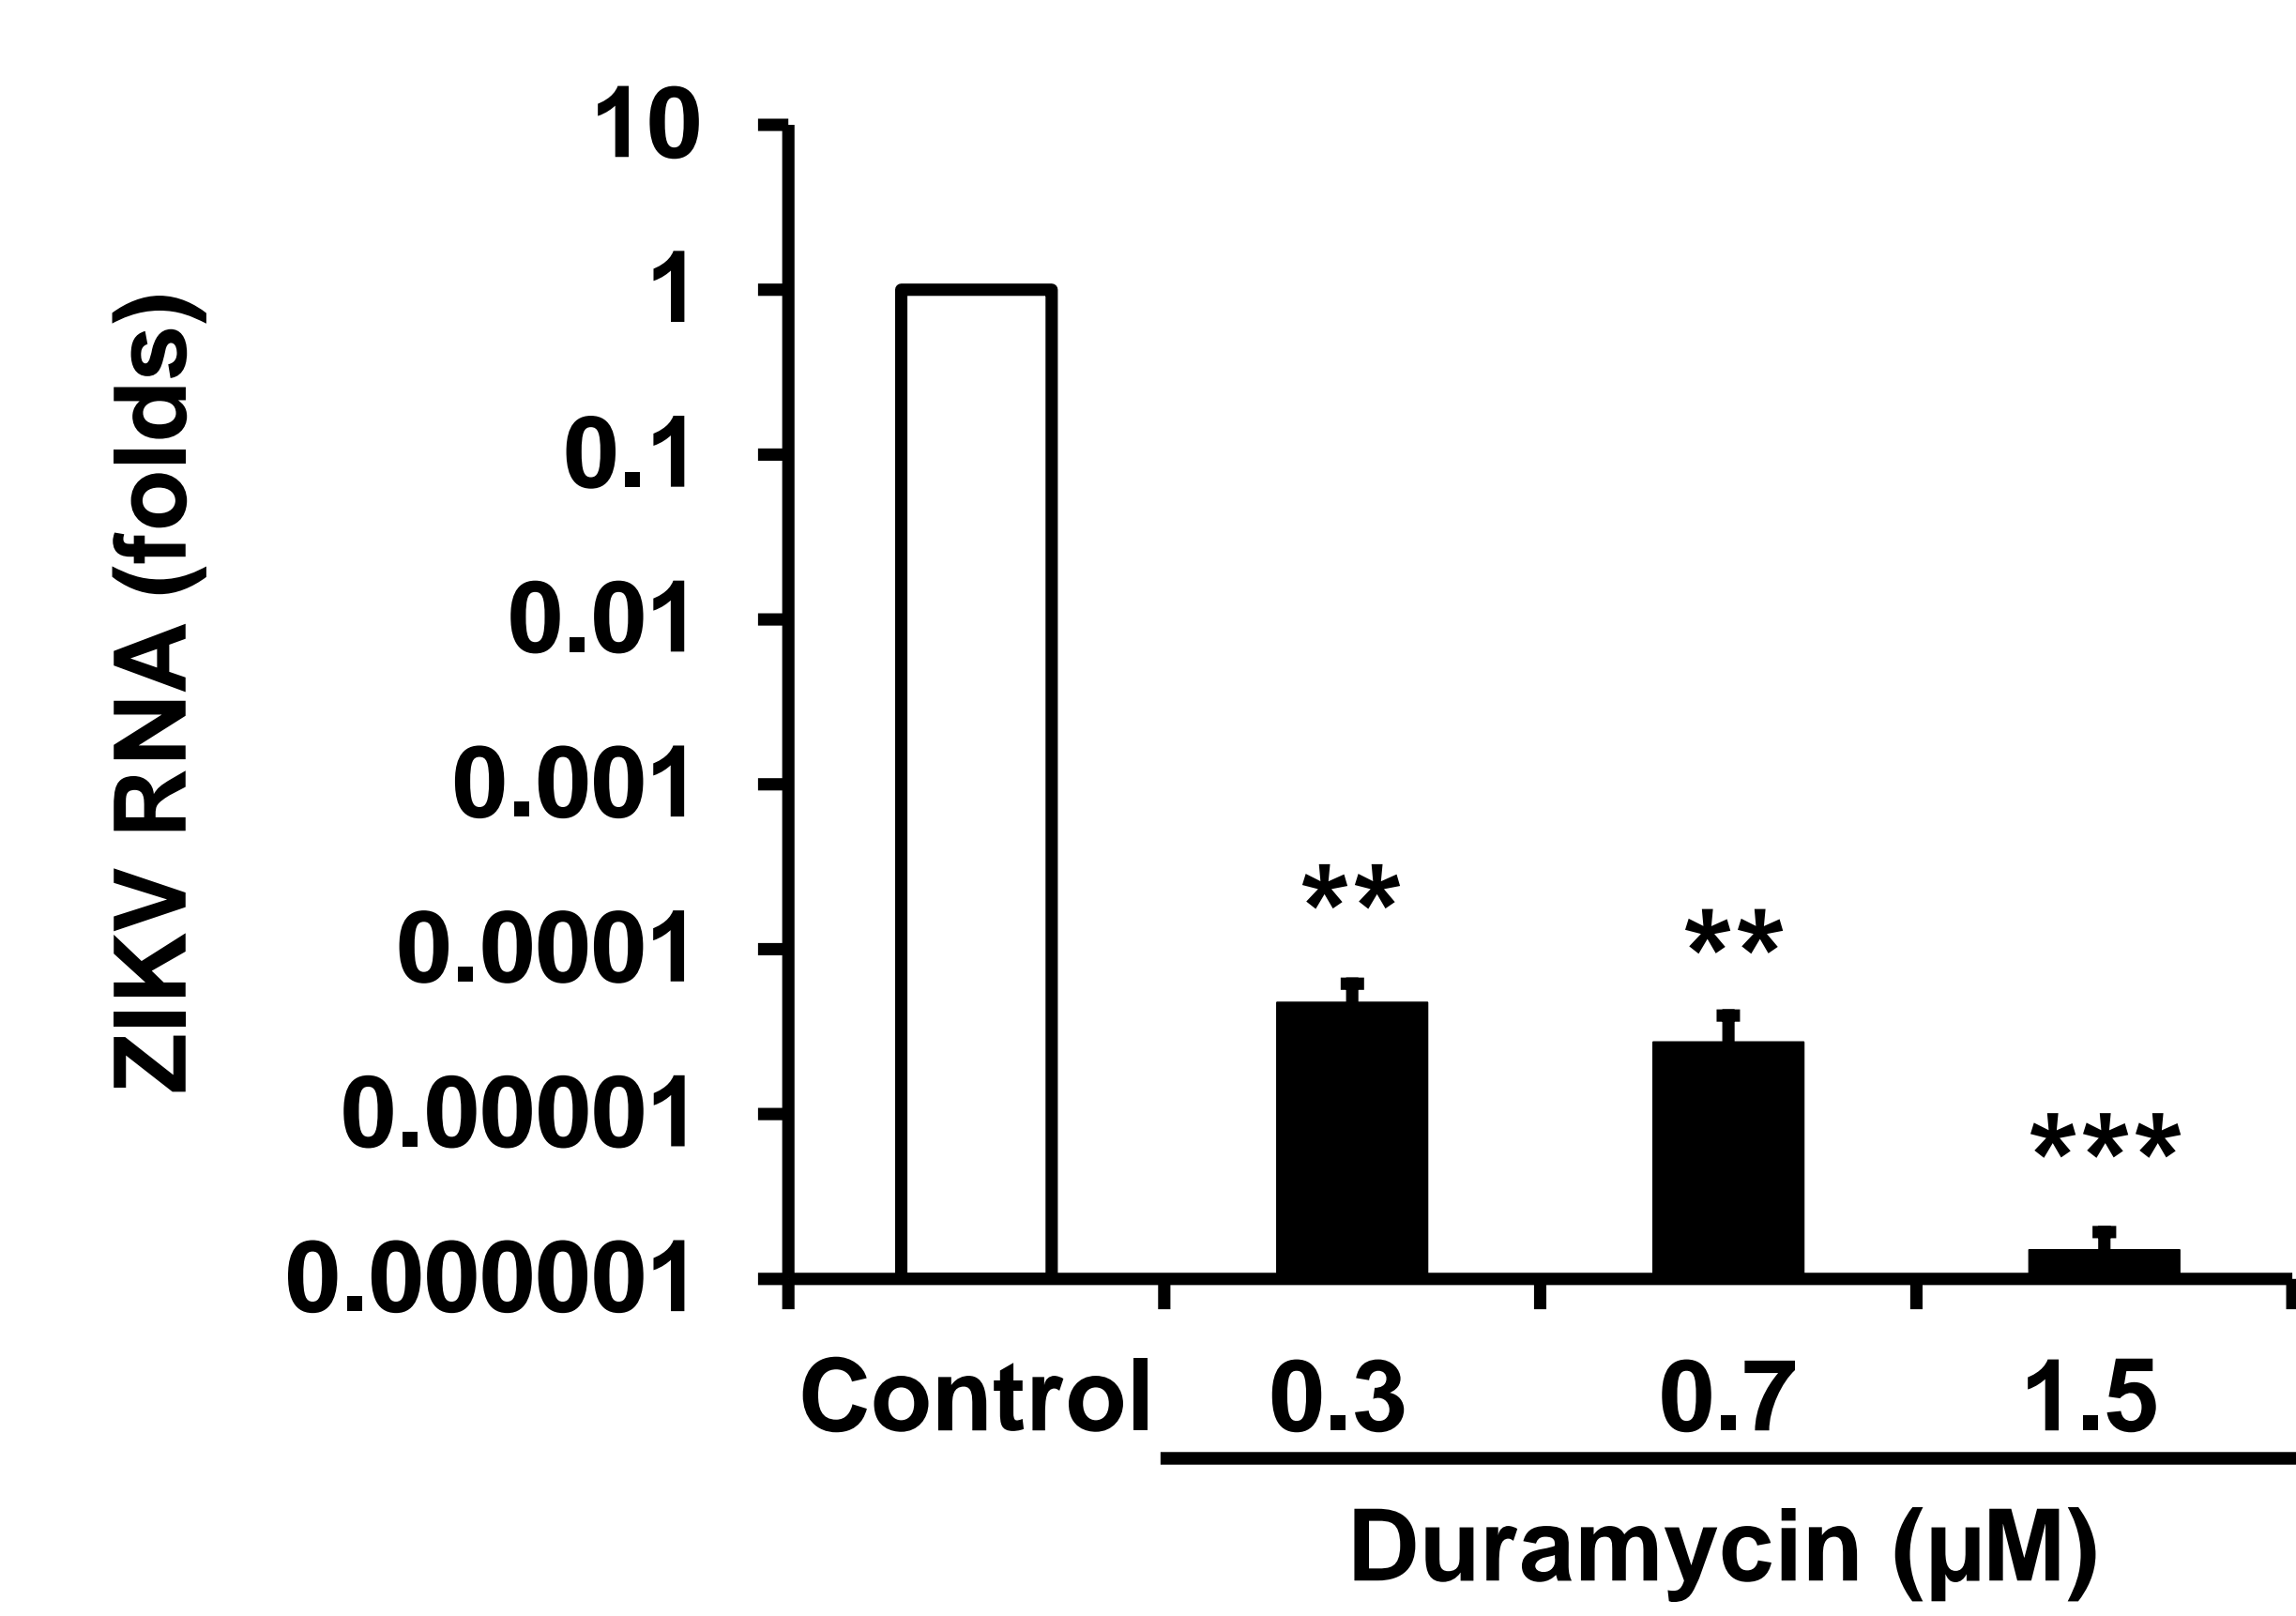

F

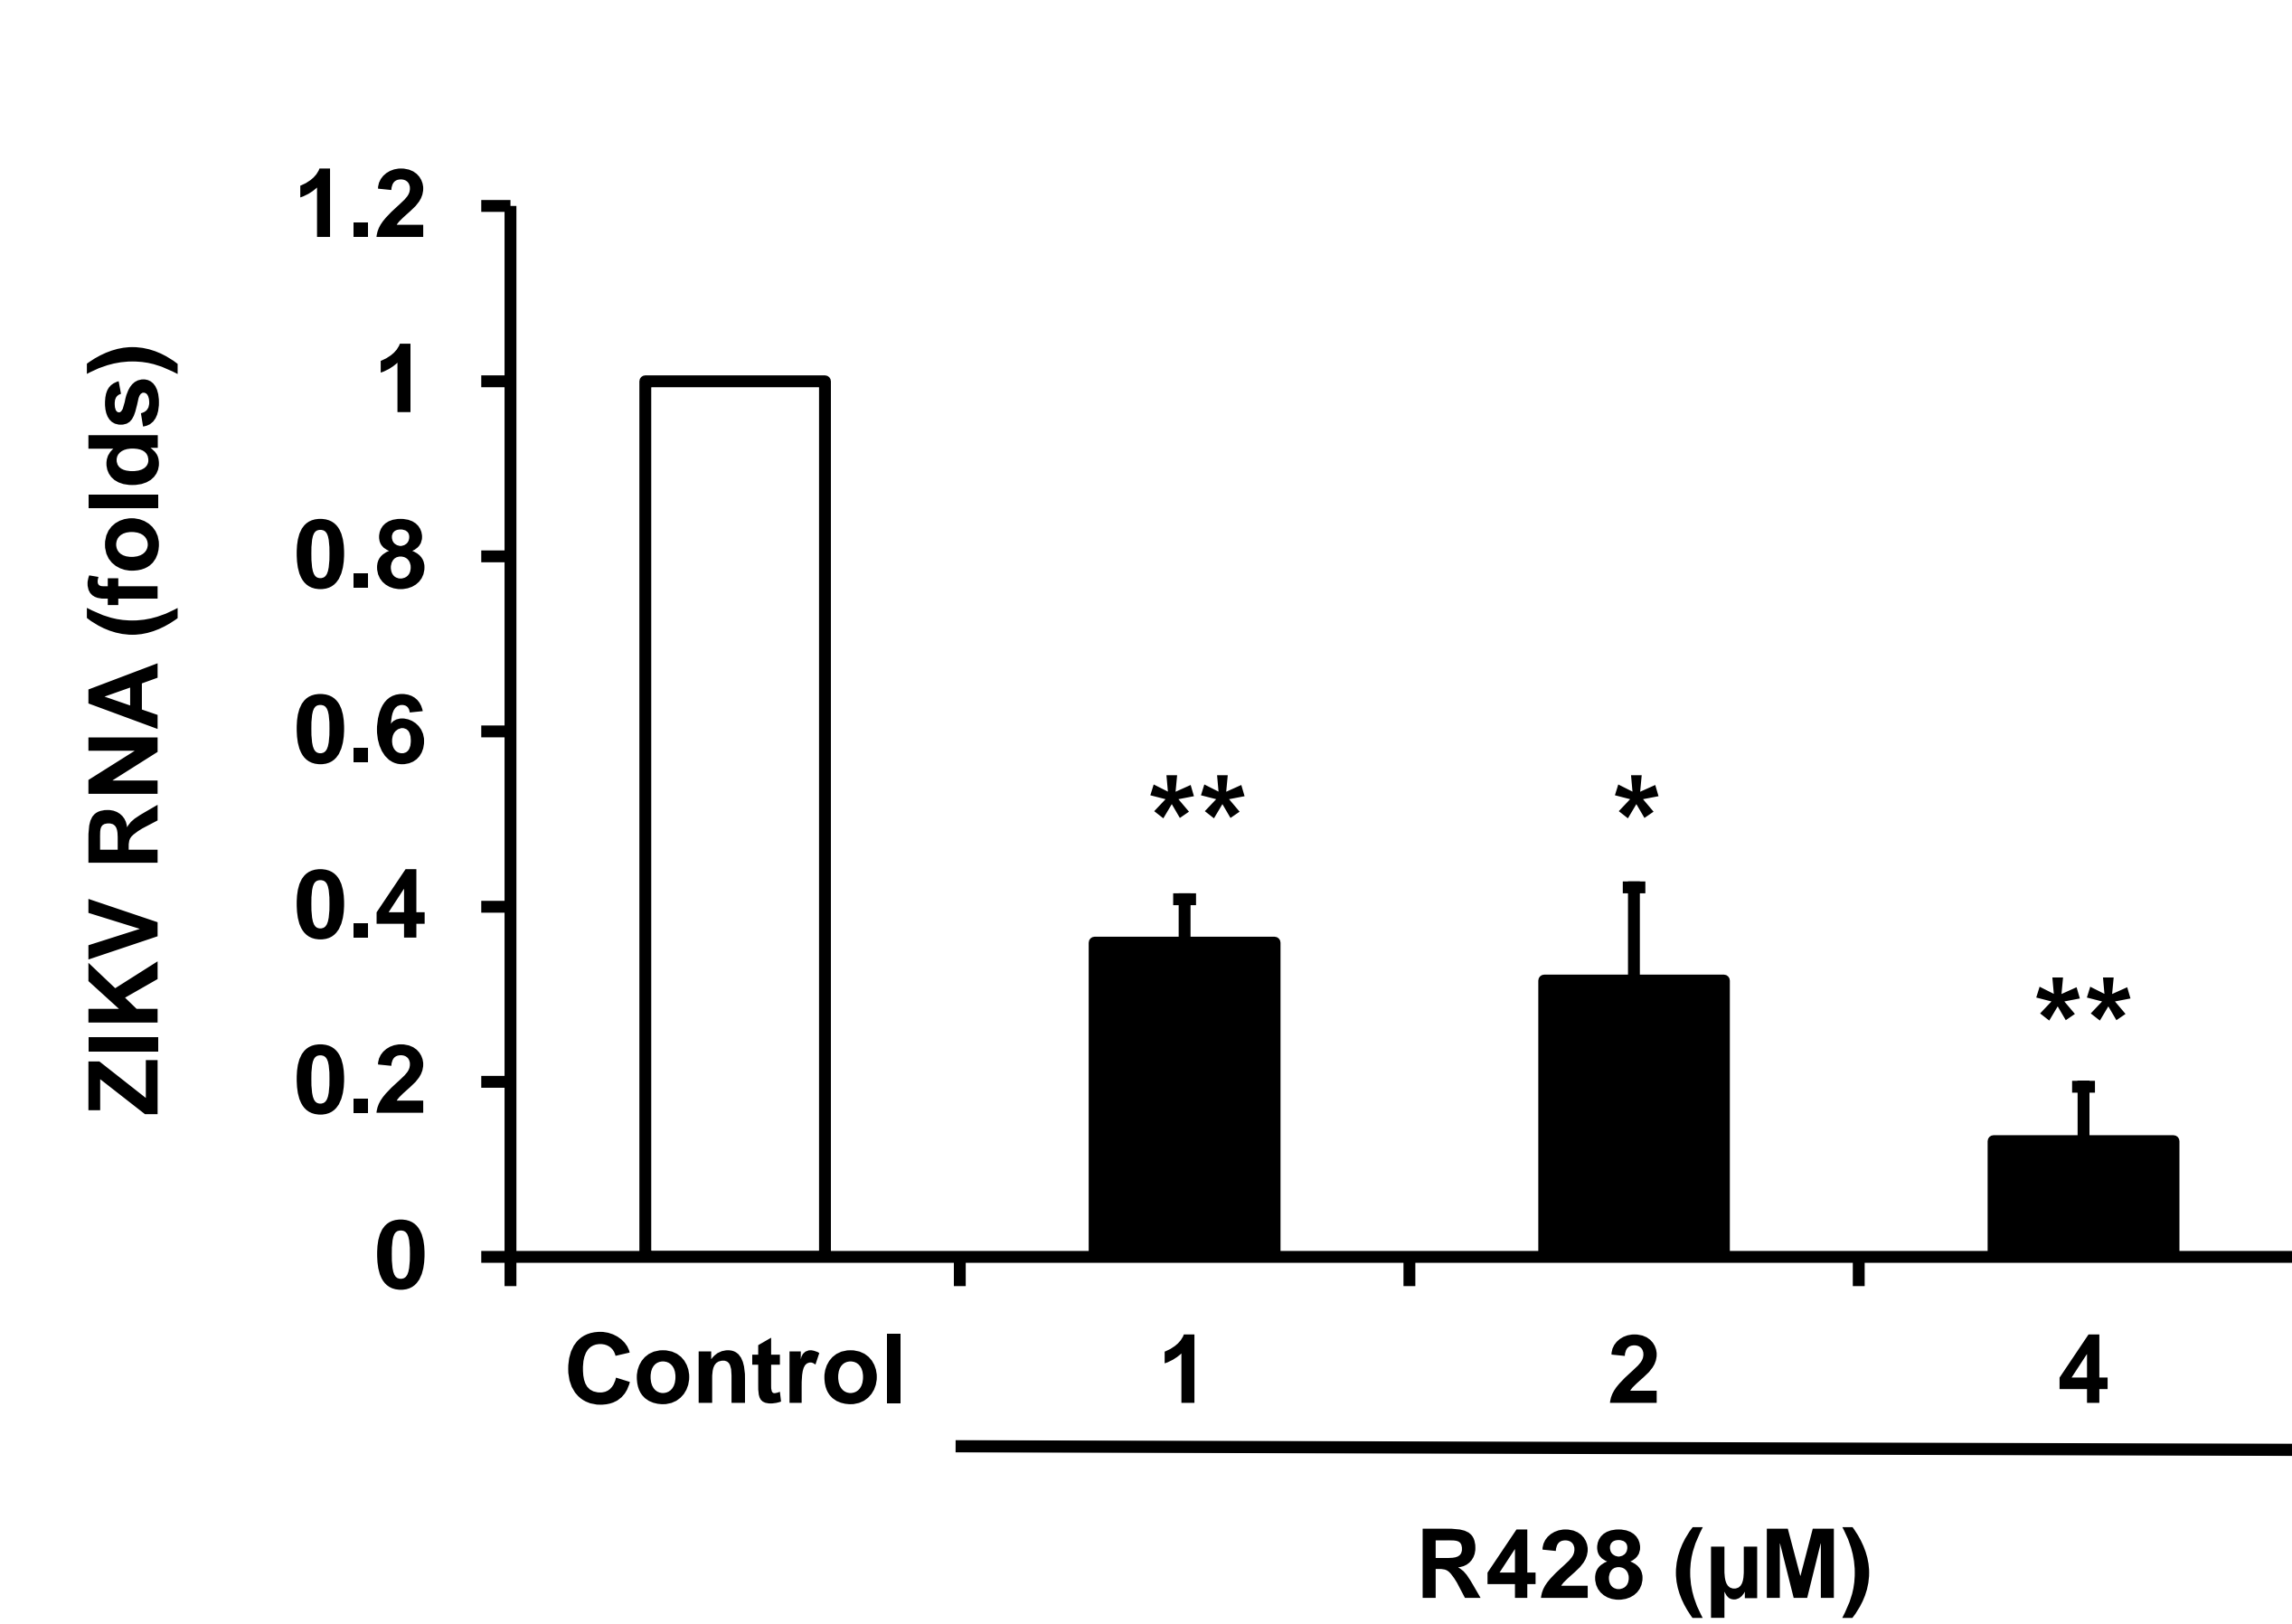

Figure S3

G

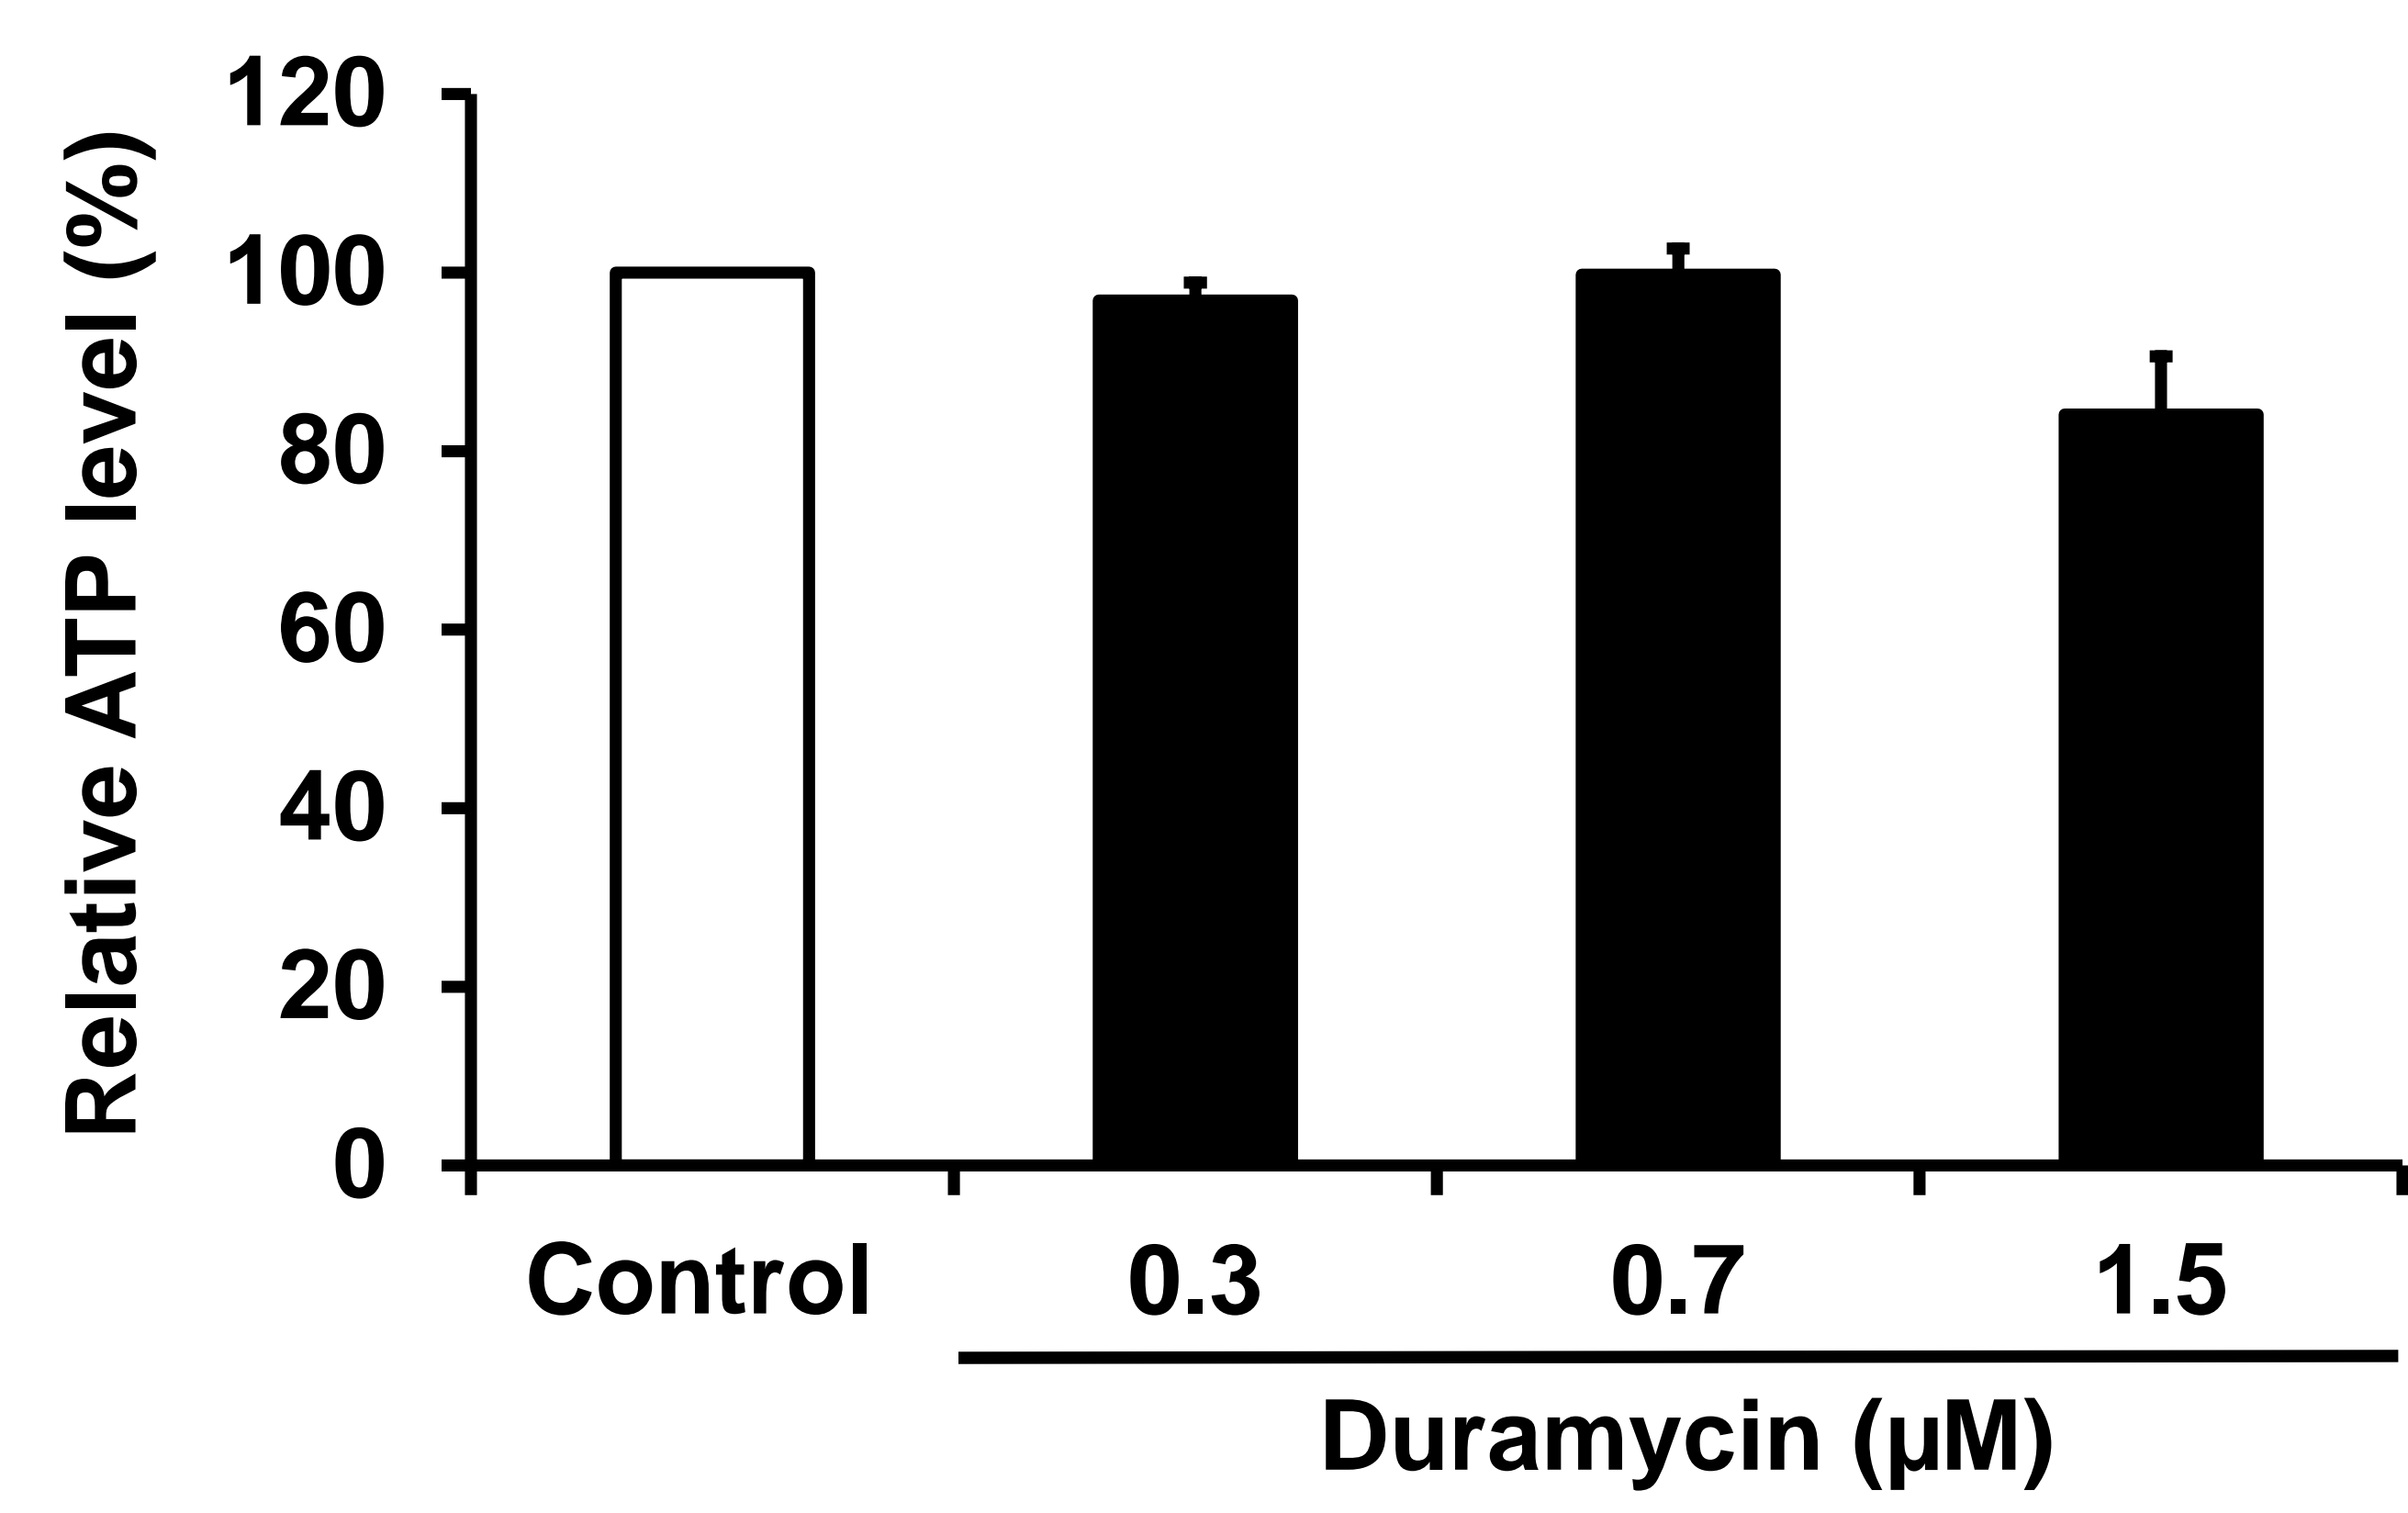

H

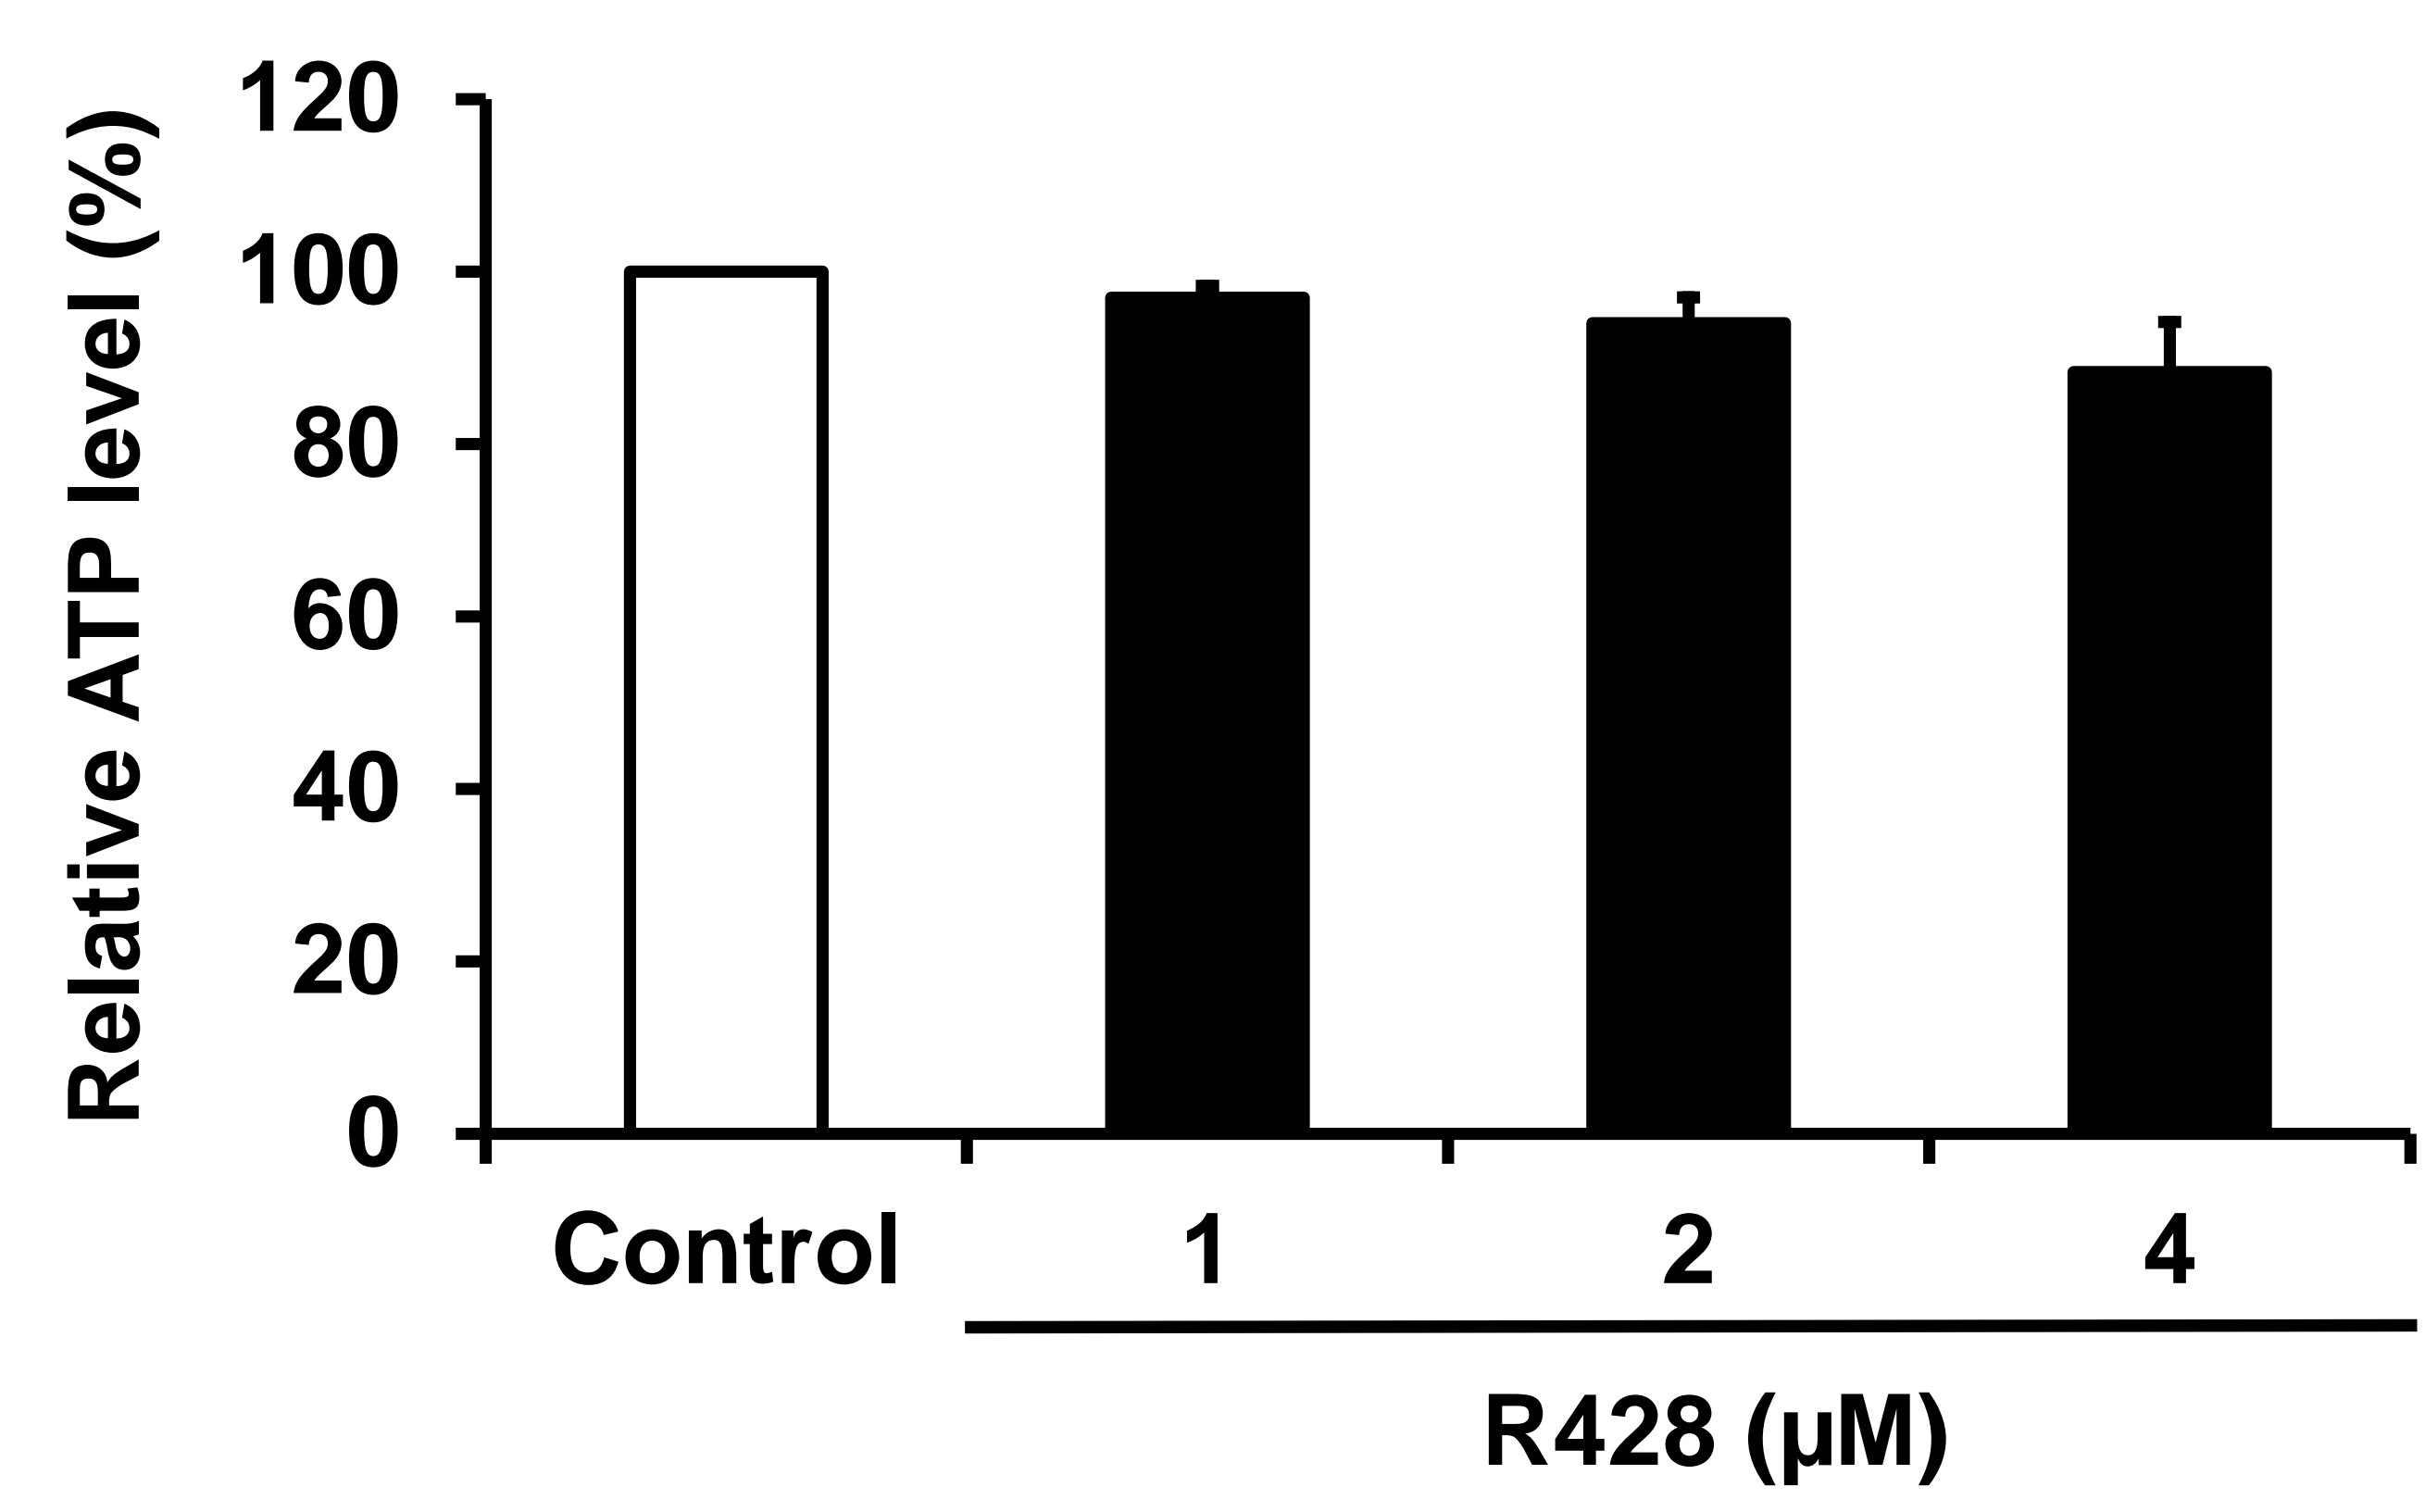

I

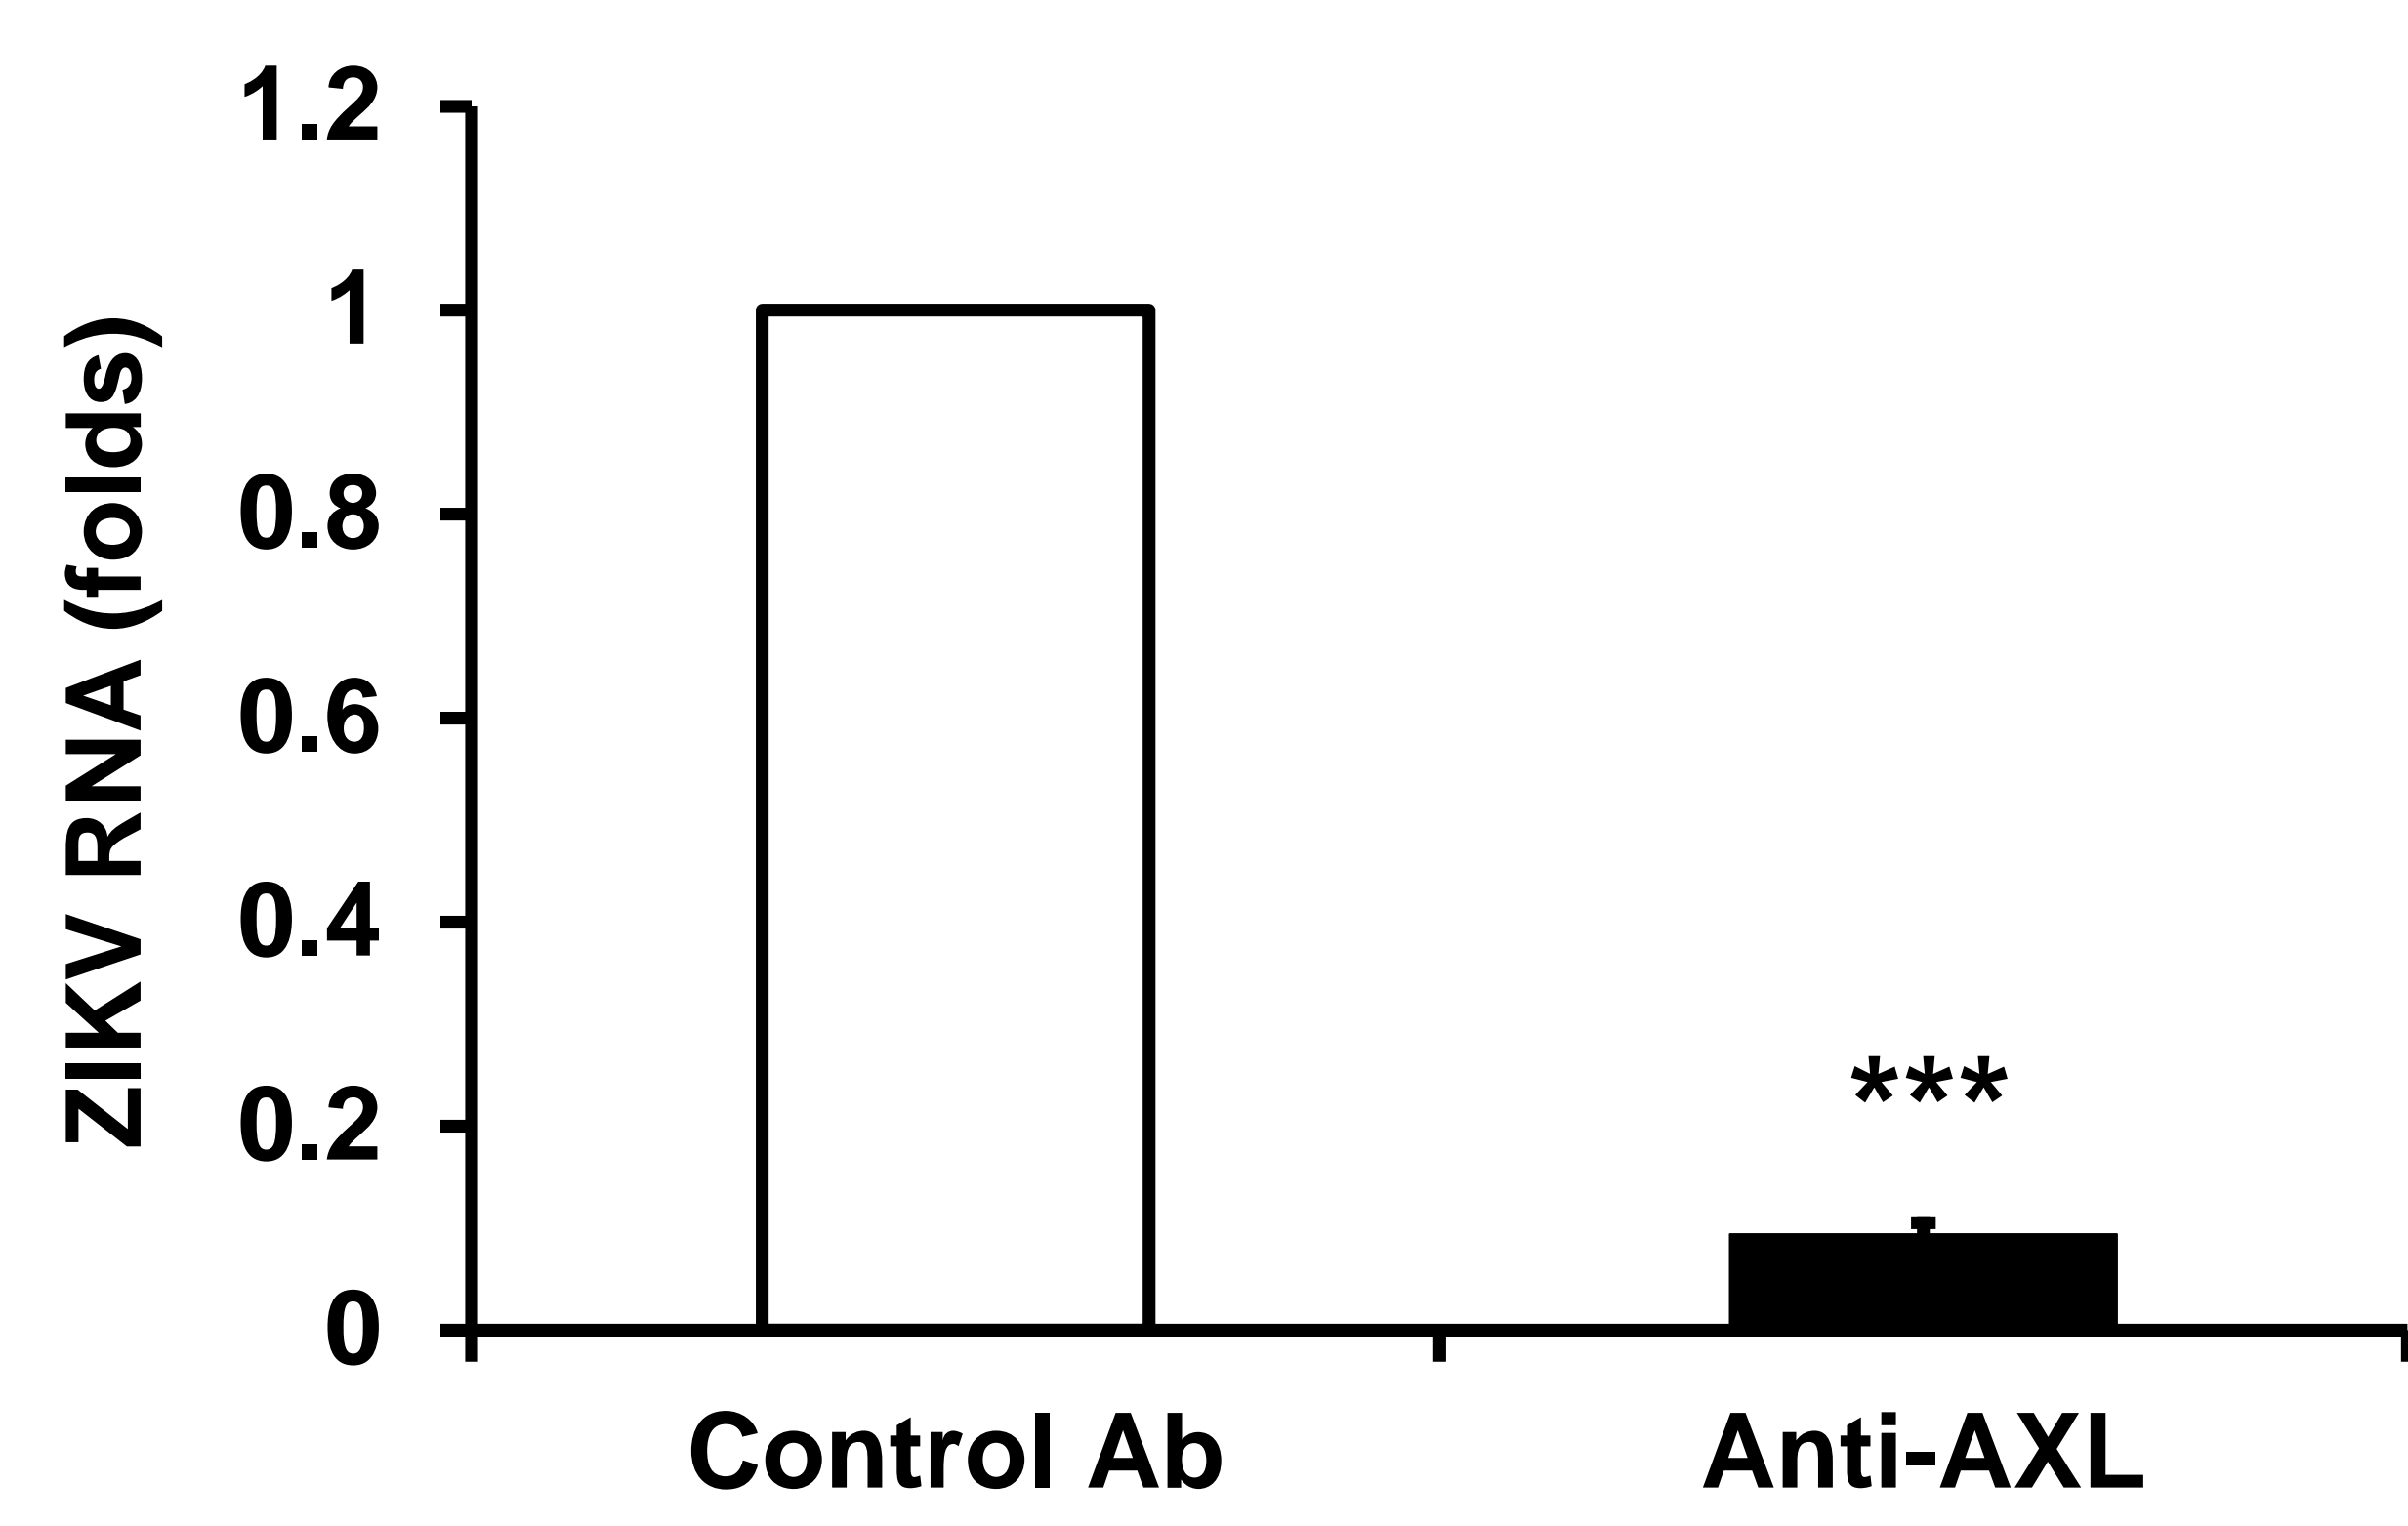



Figure S4

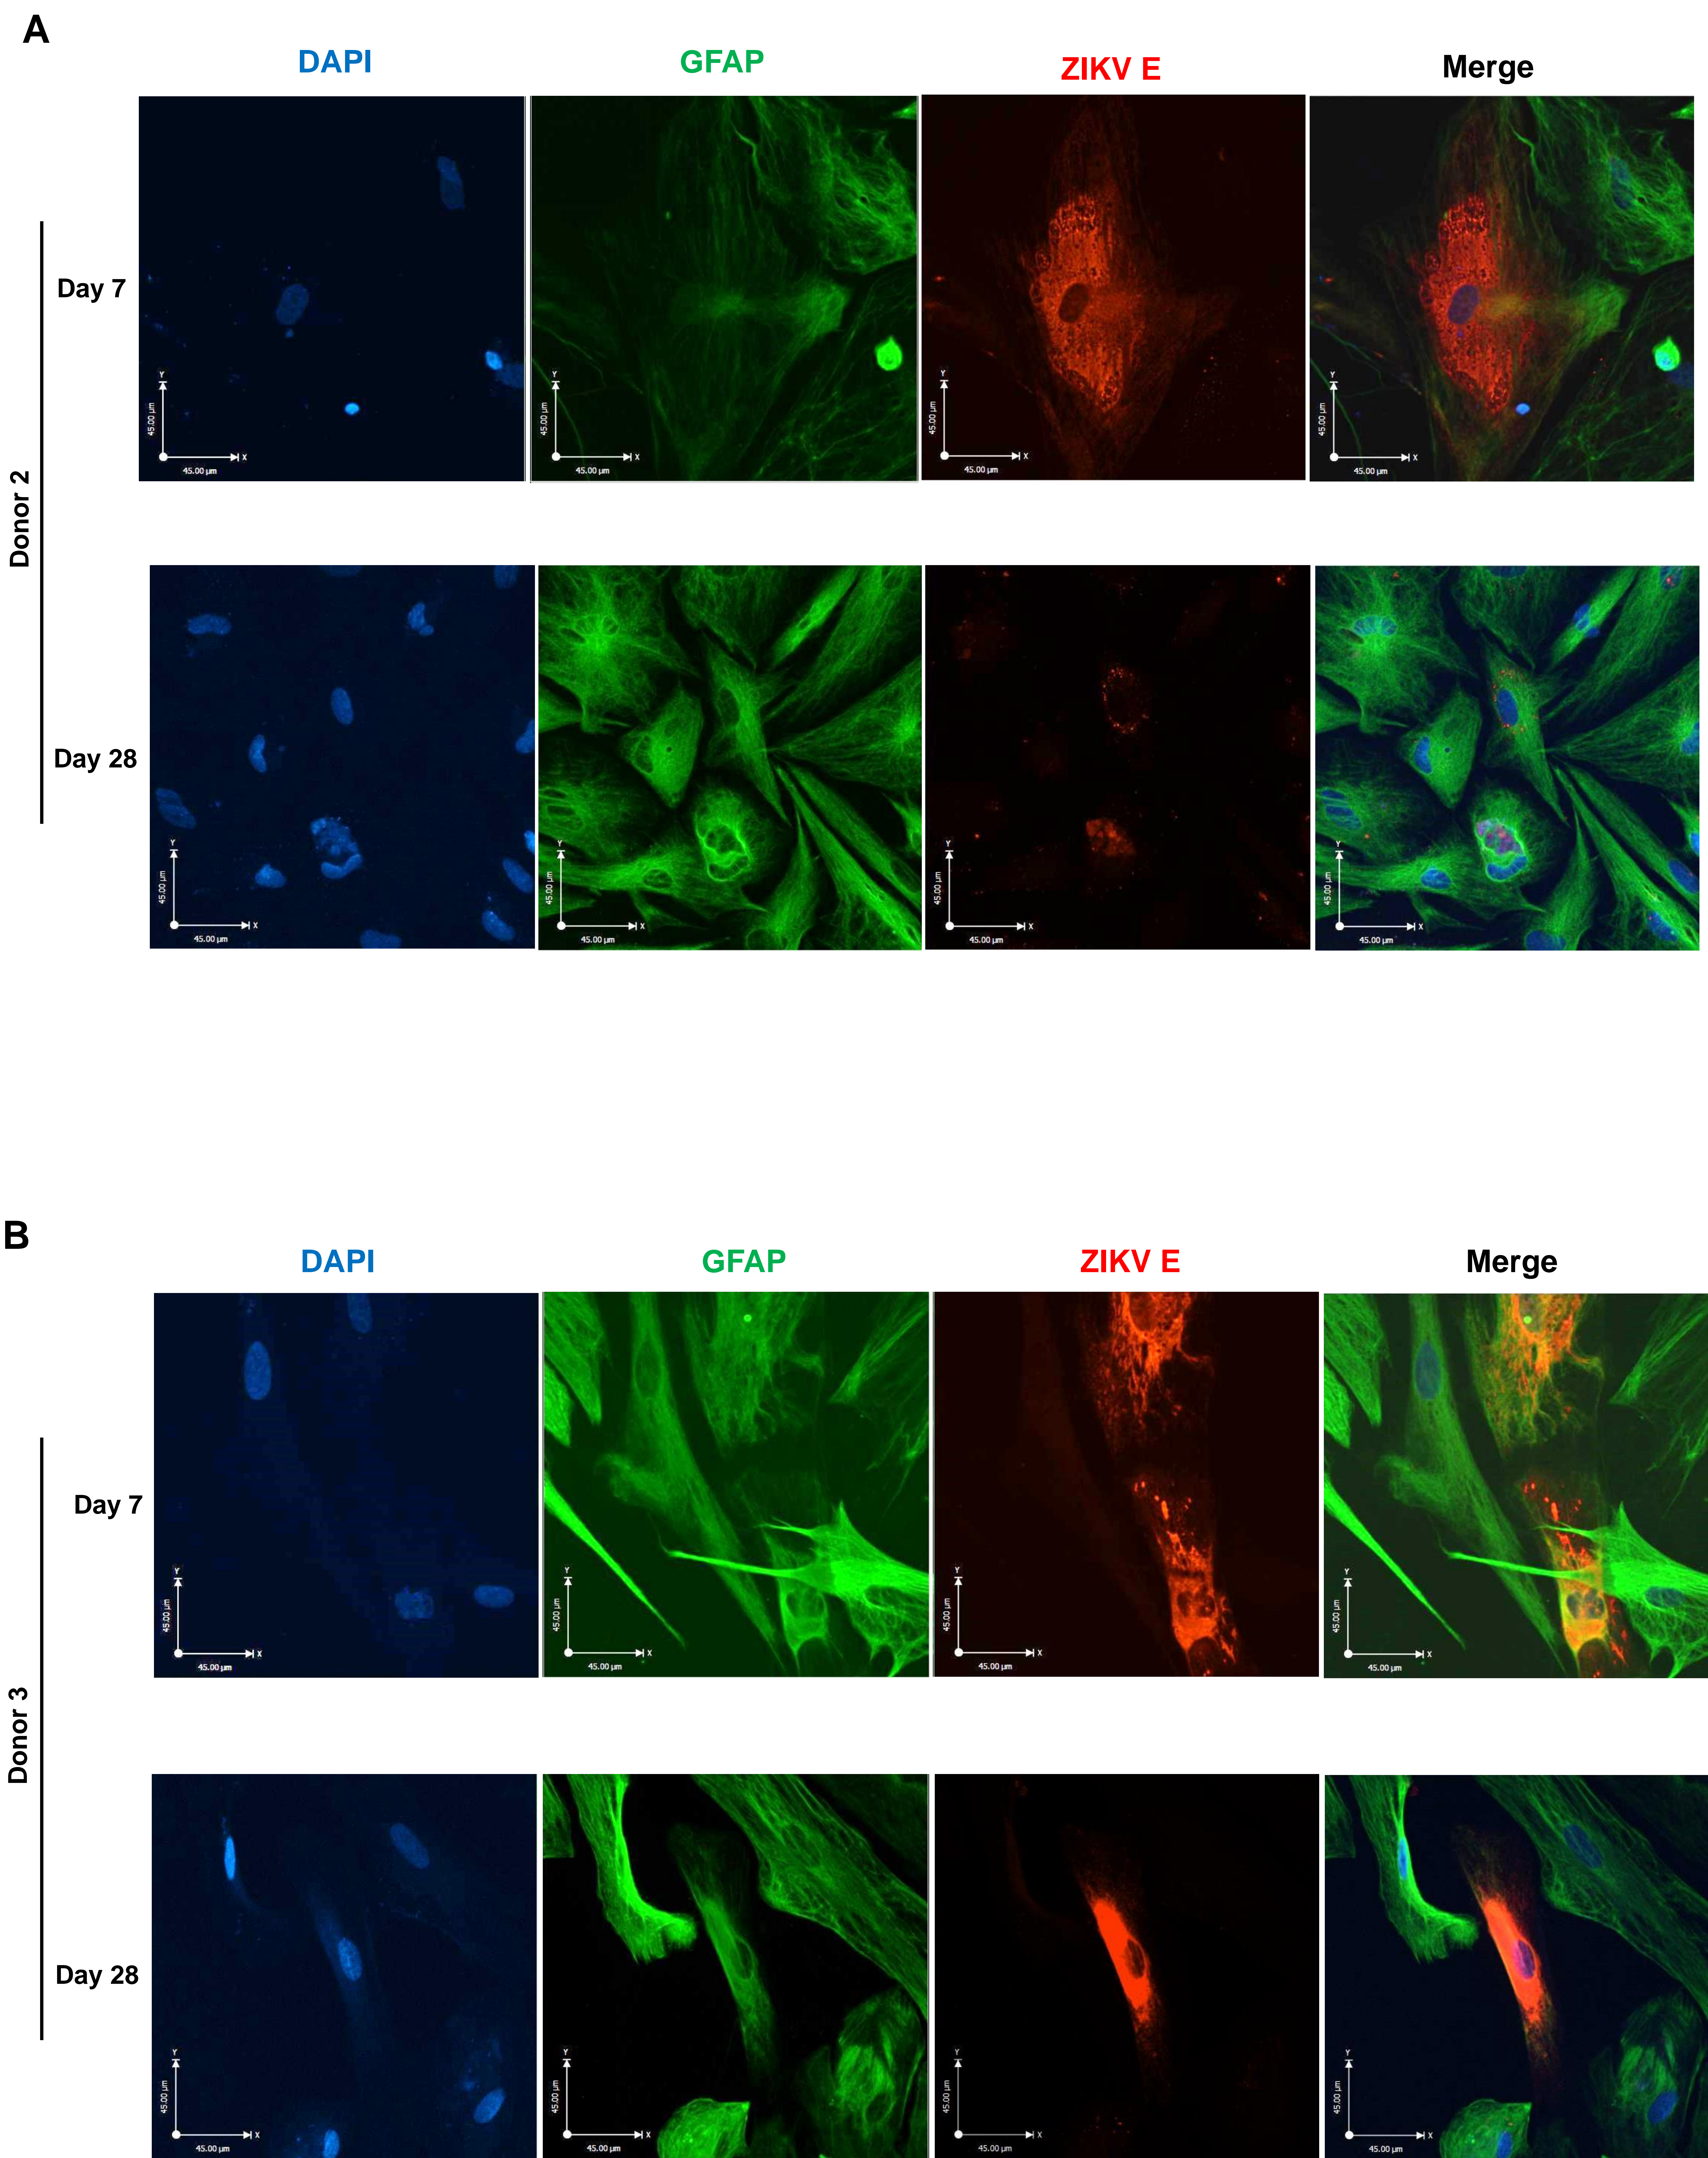



Figure S4

C

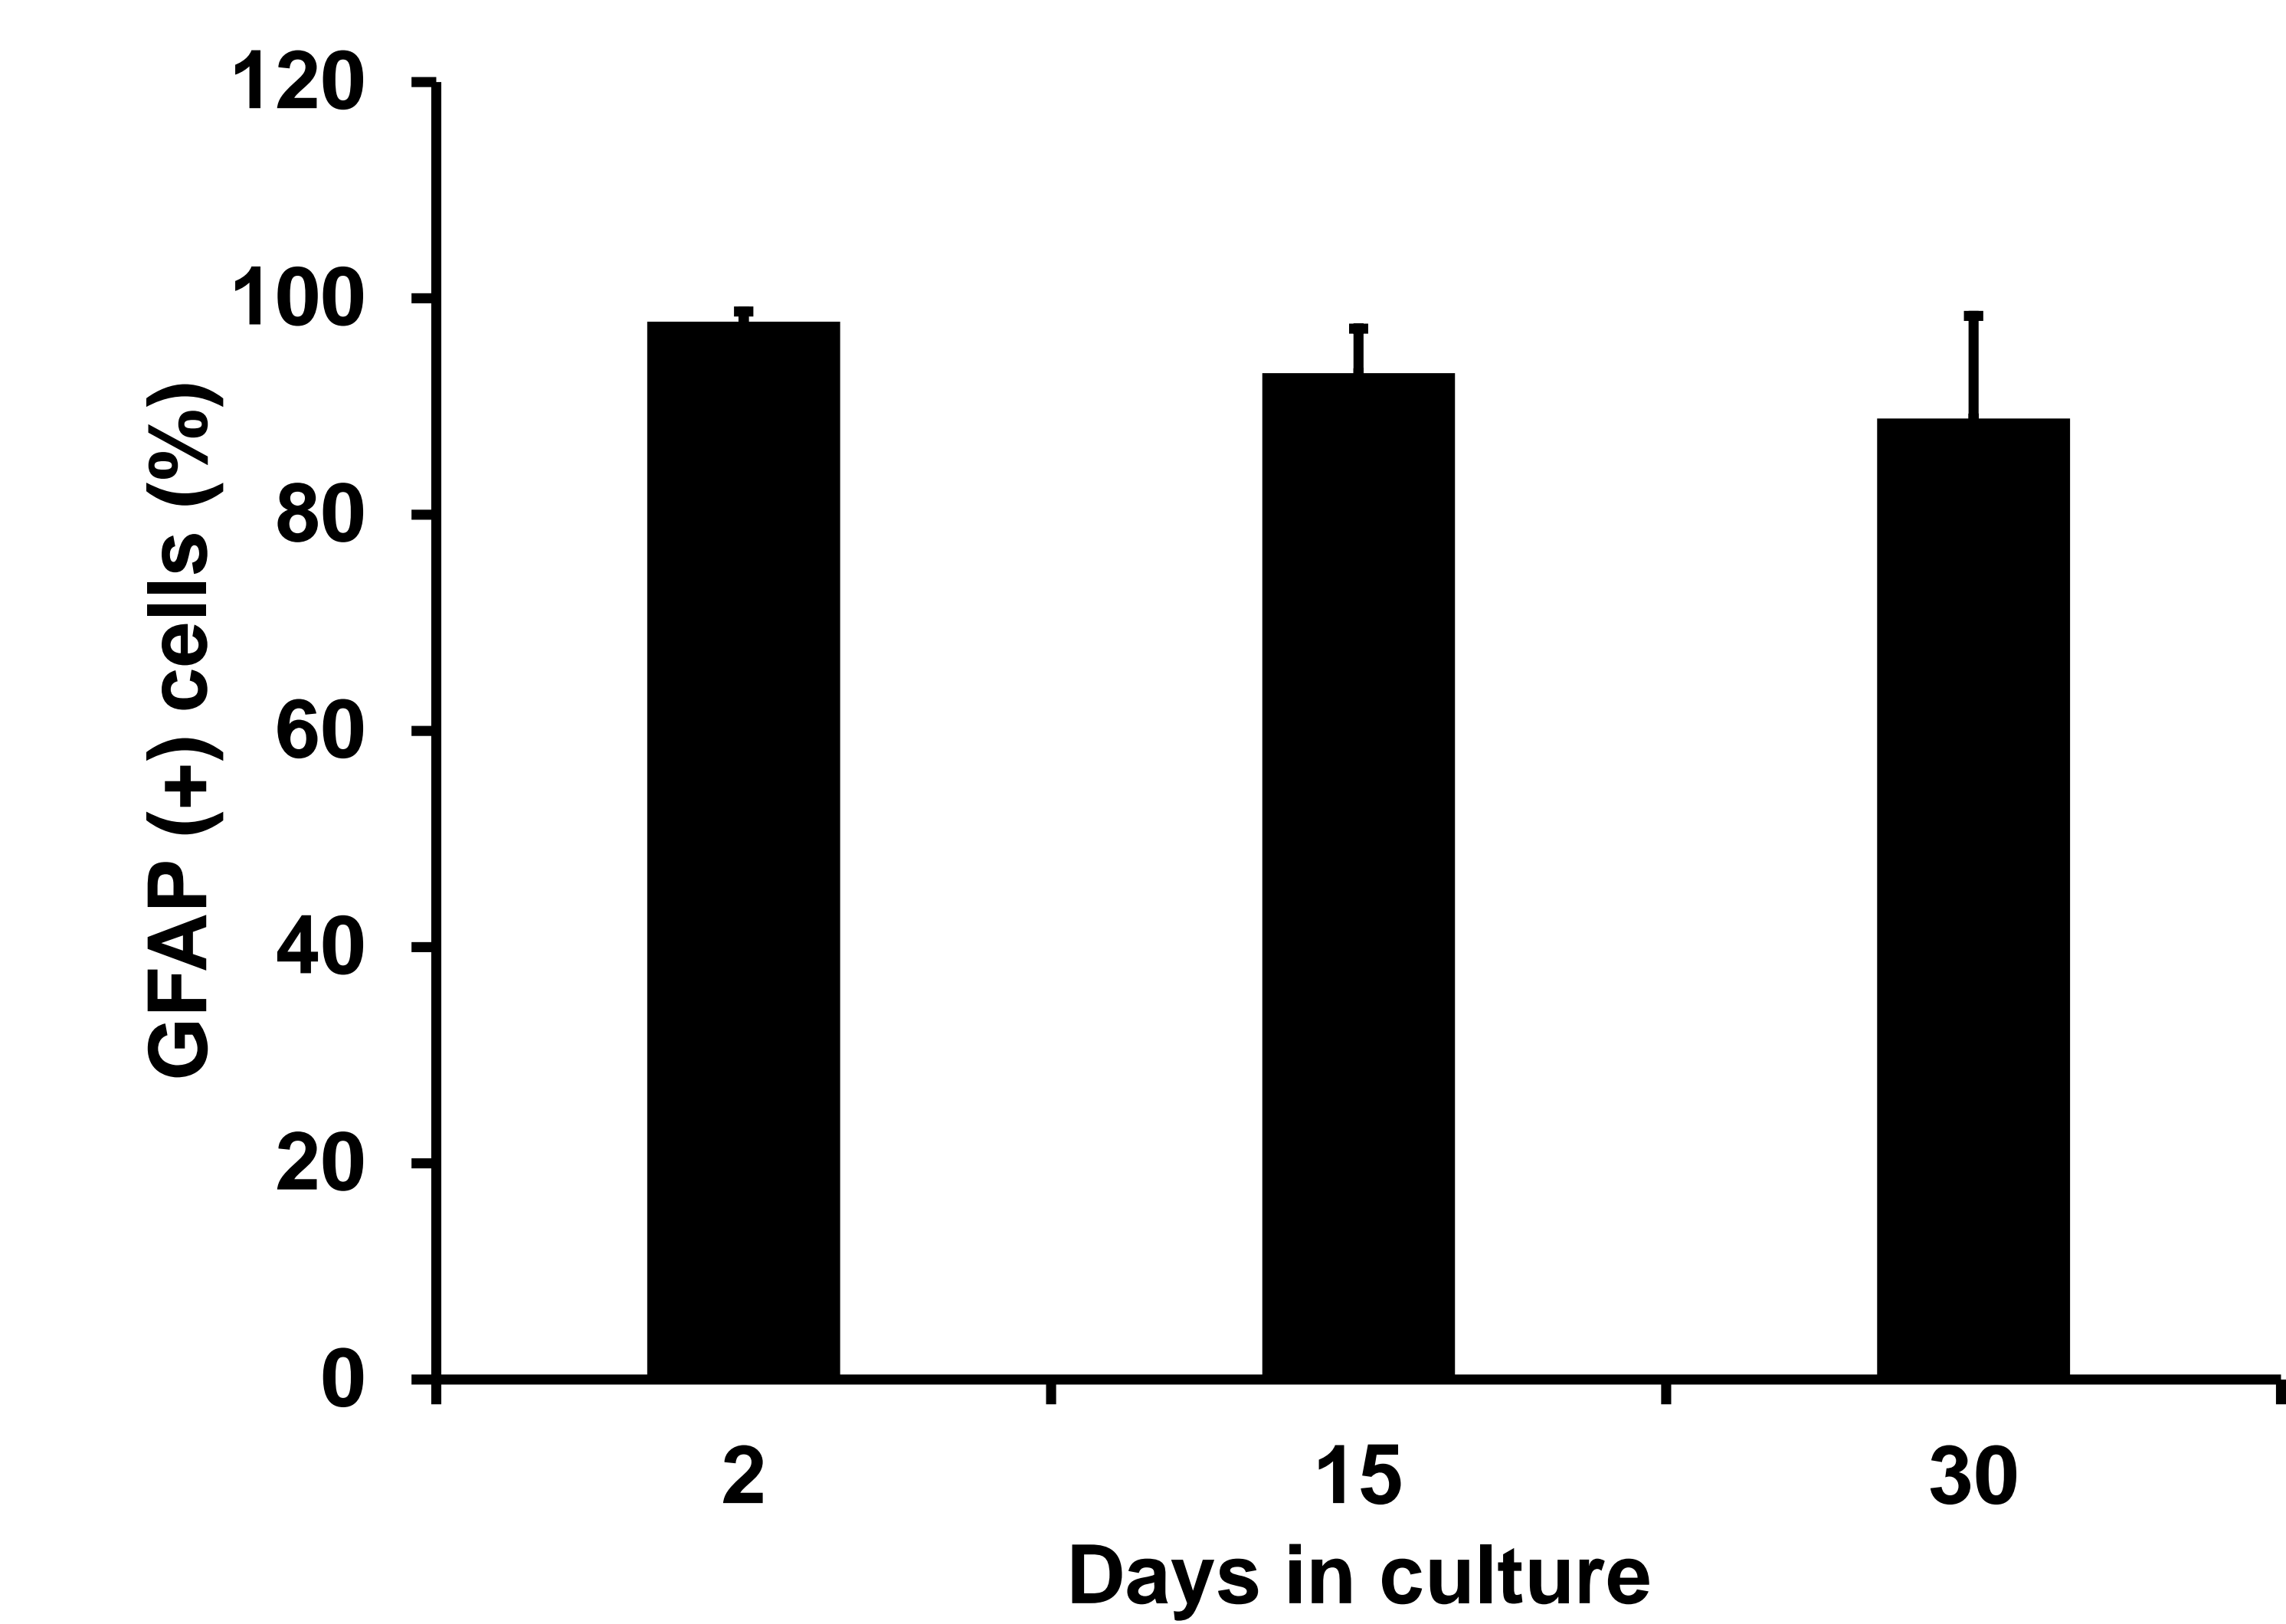

D

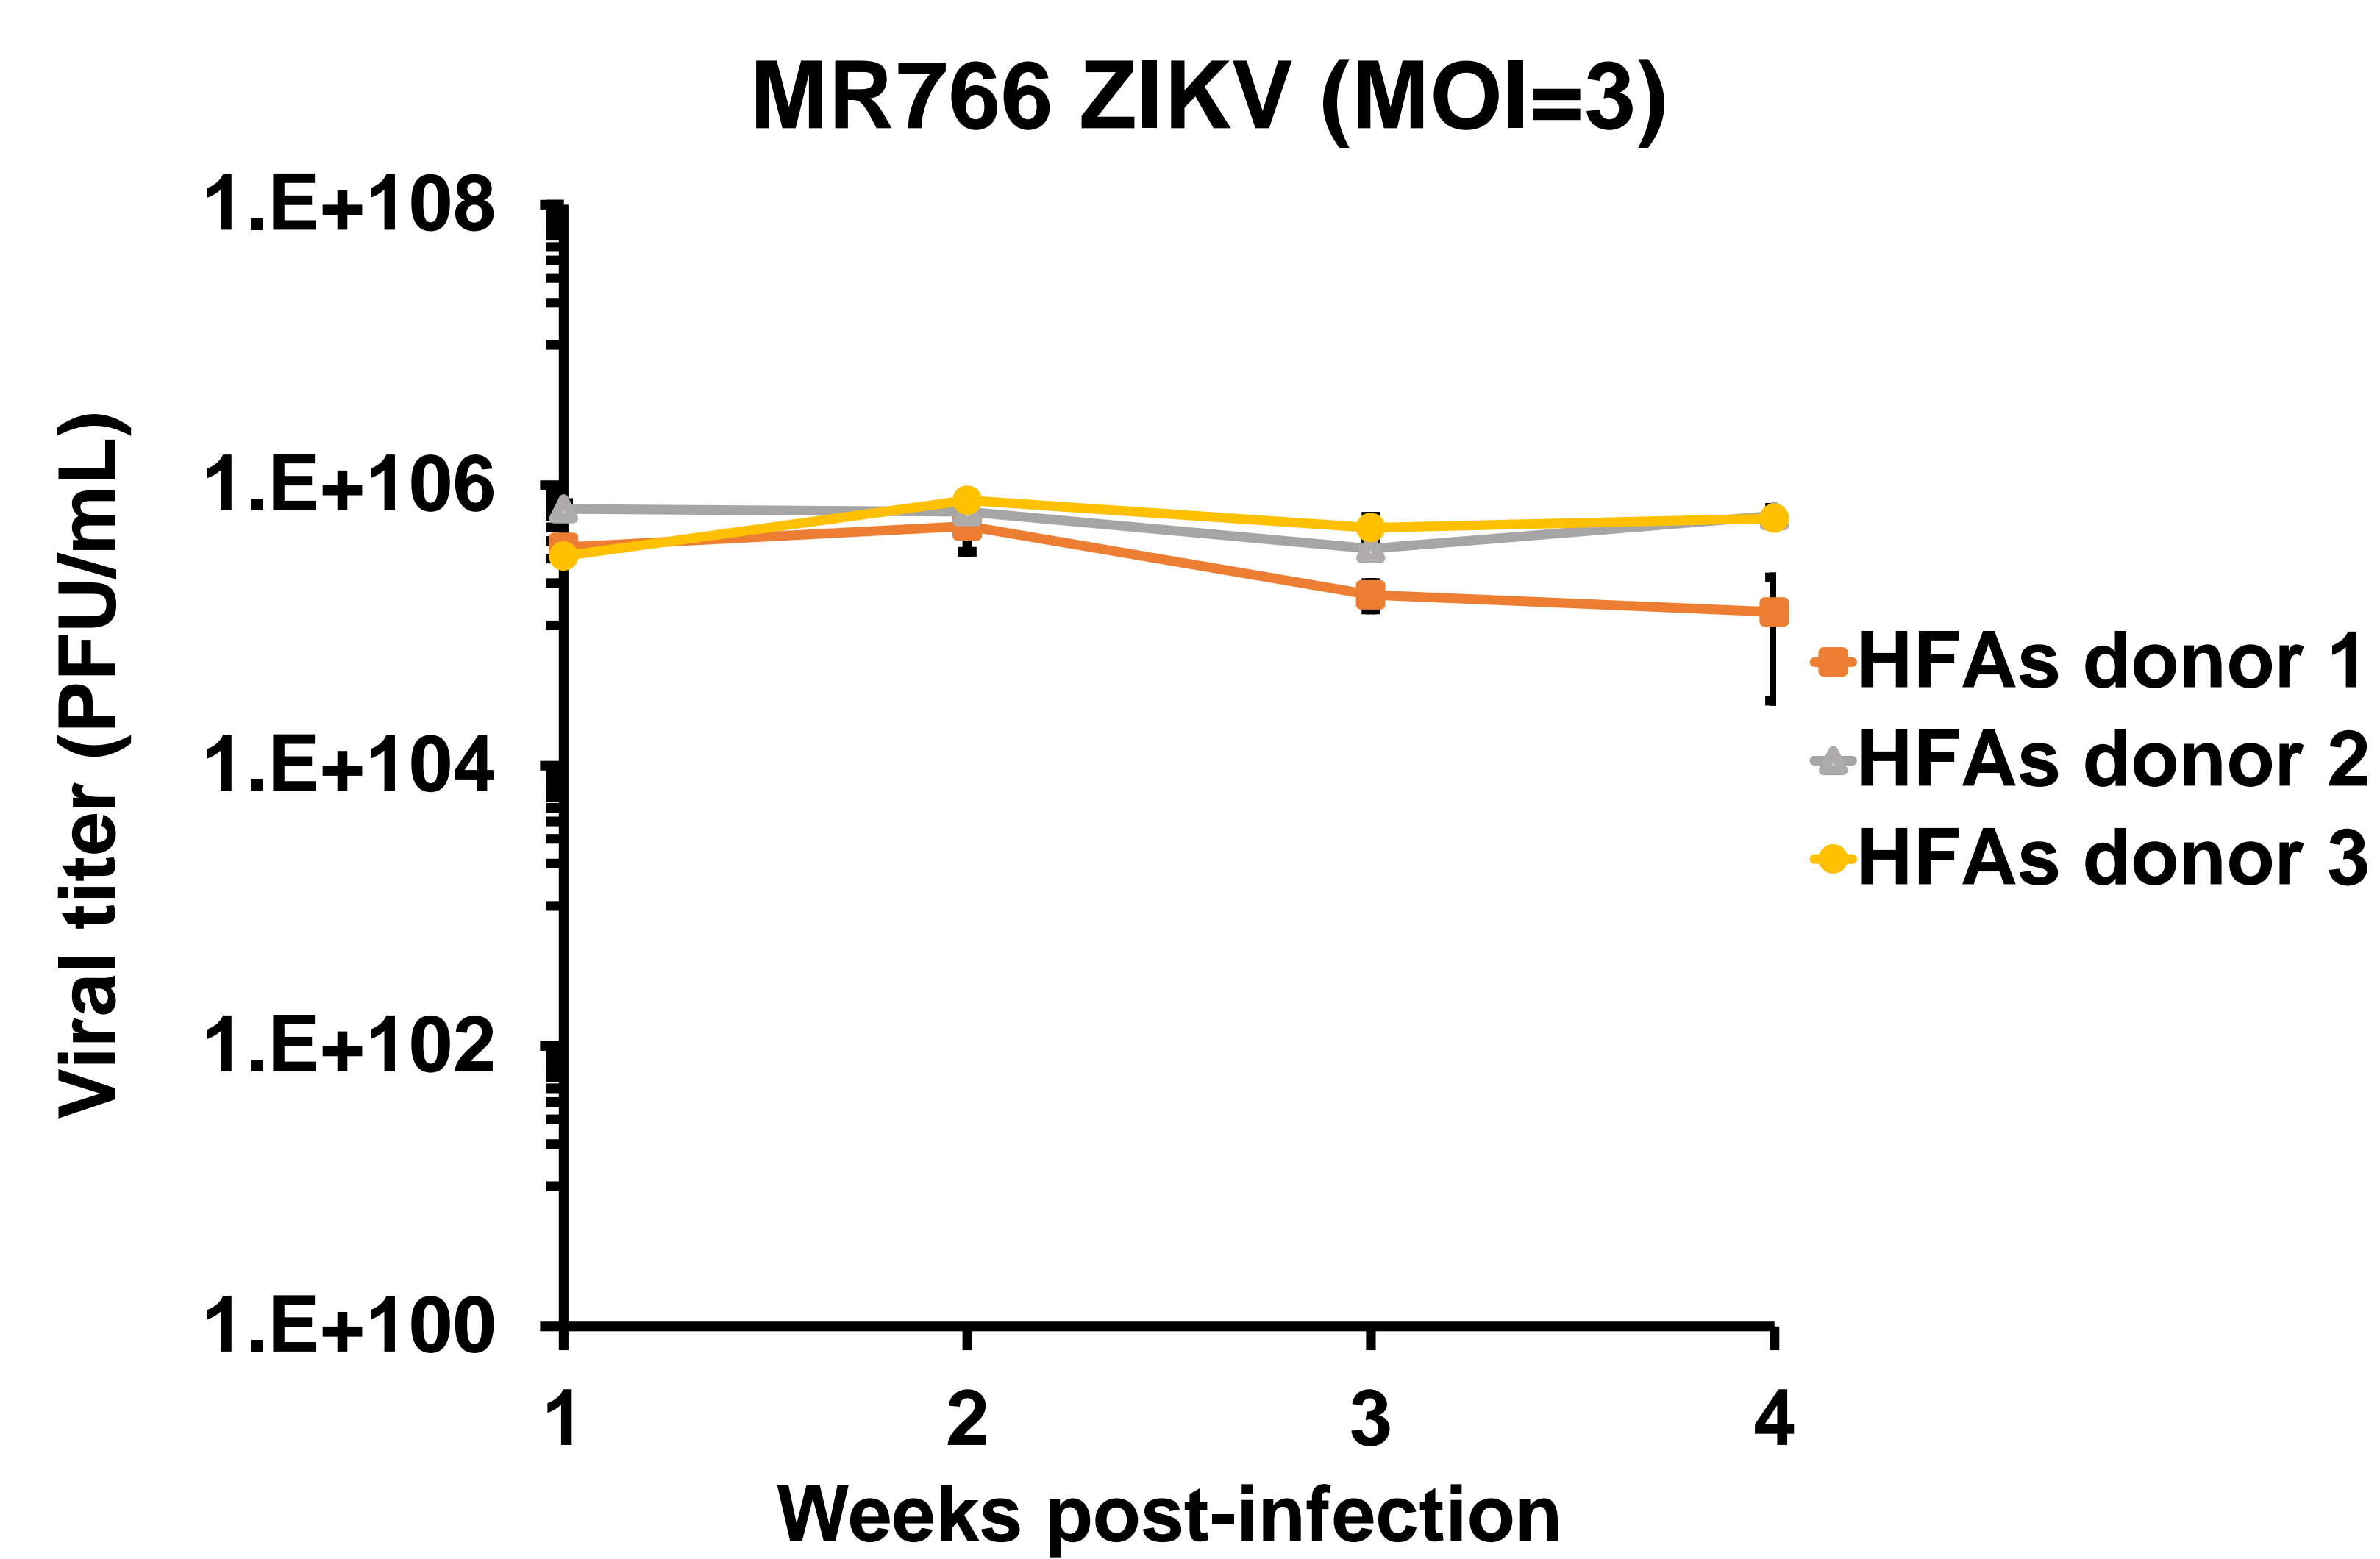

E

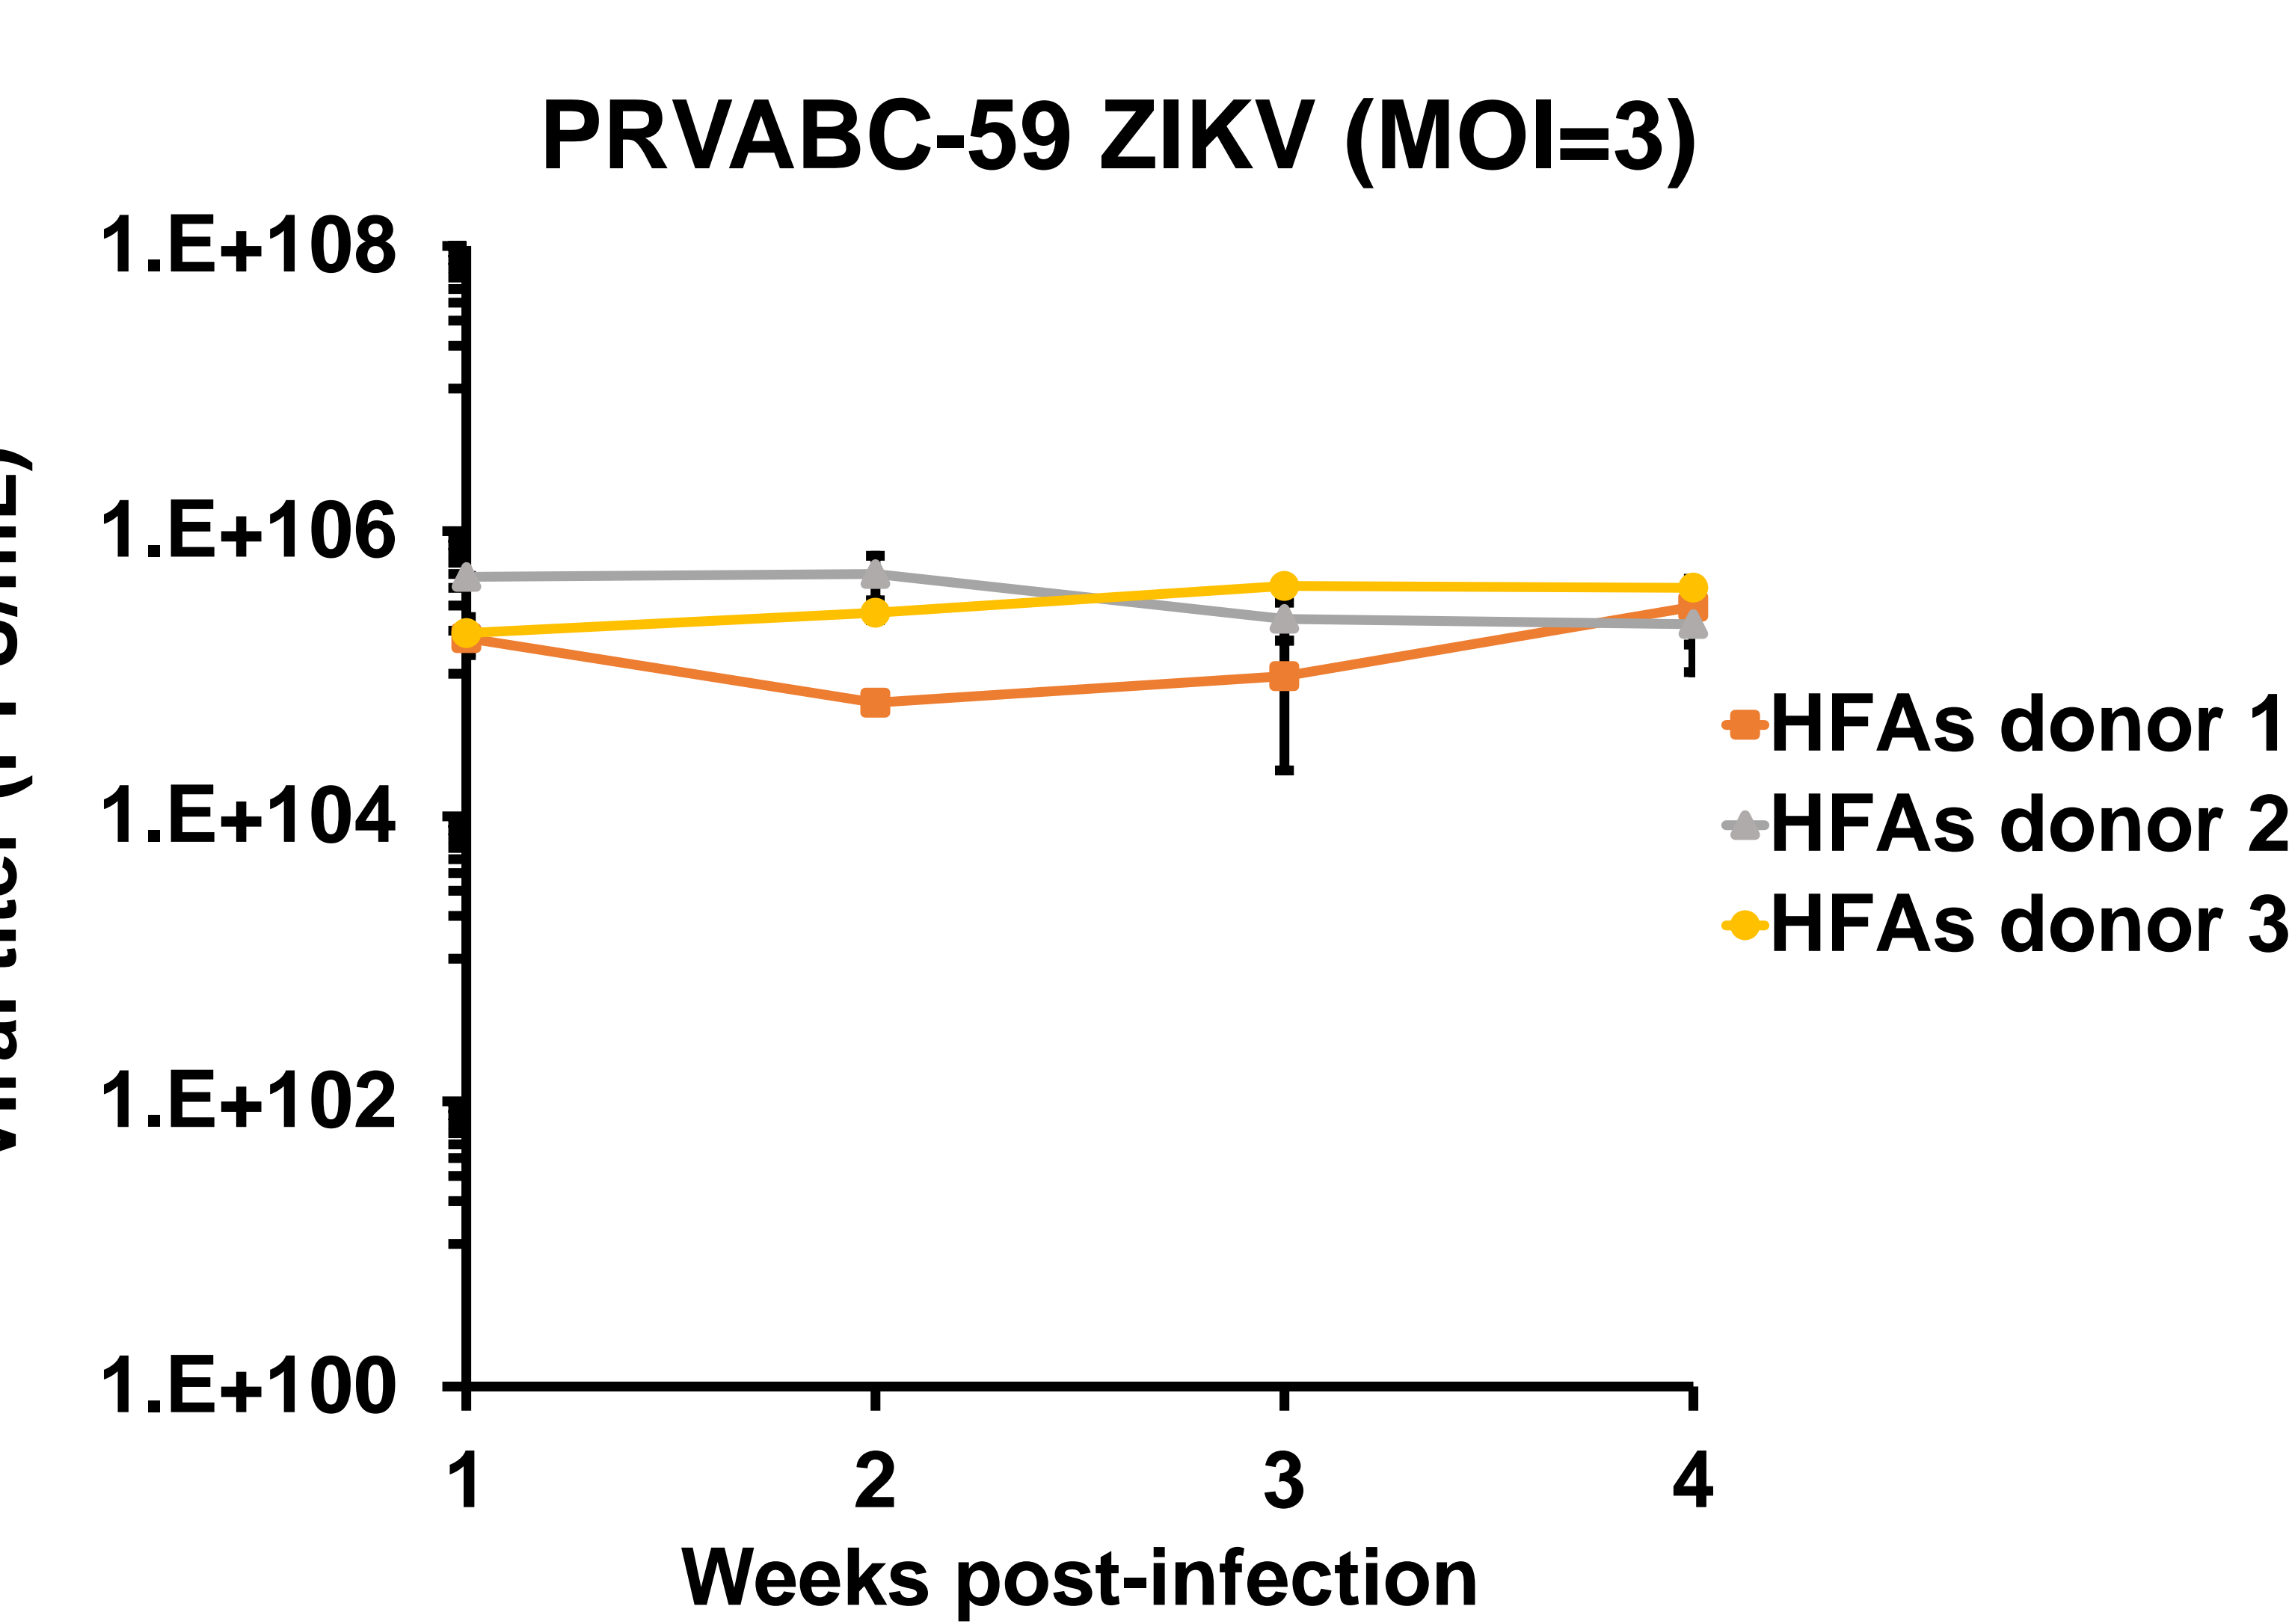

F

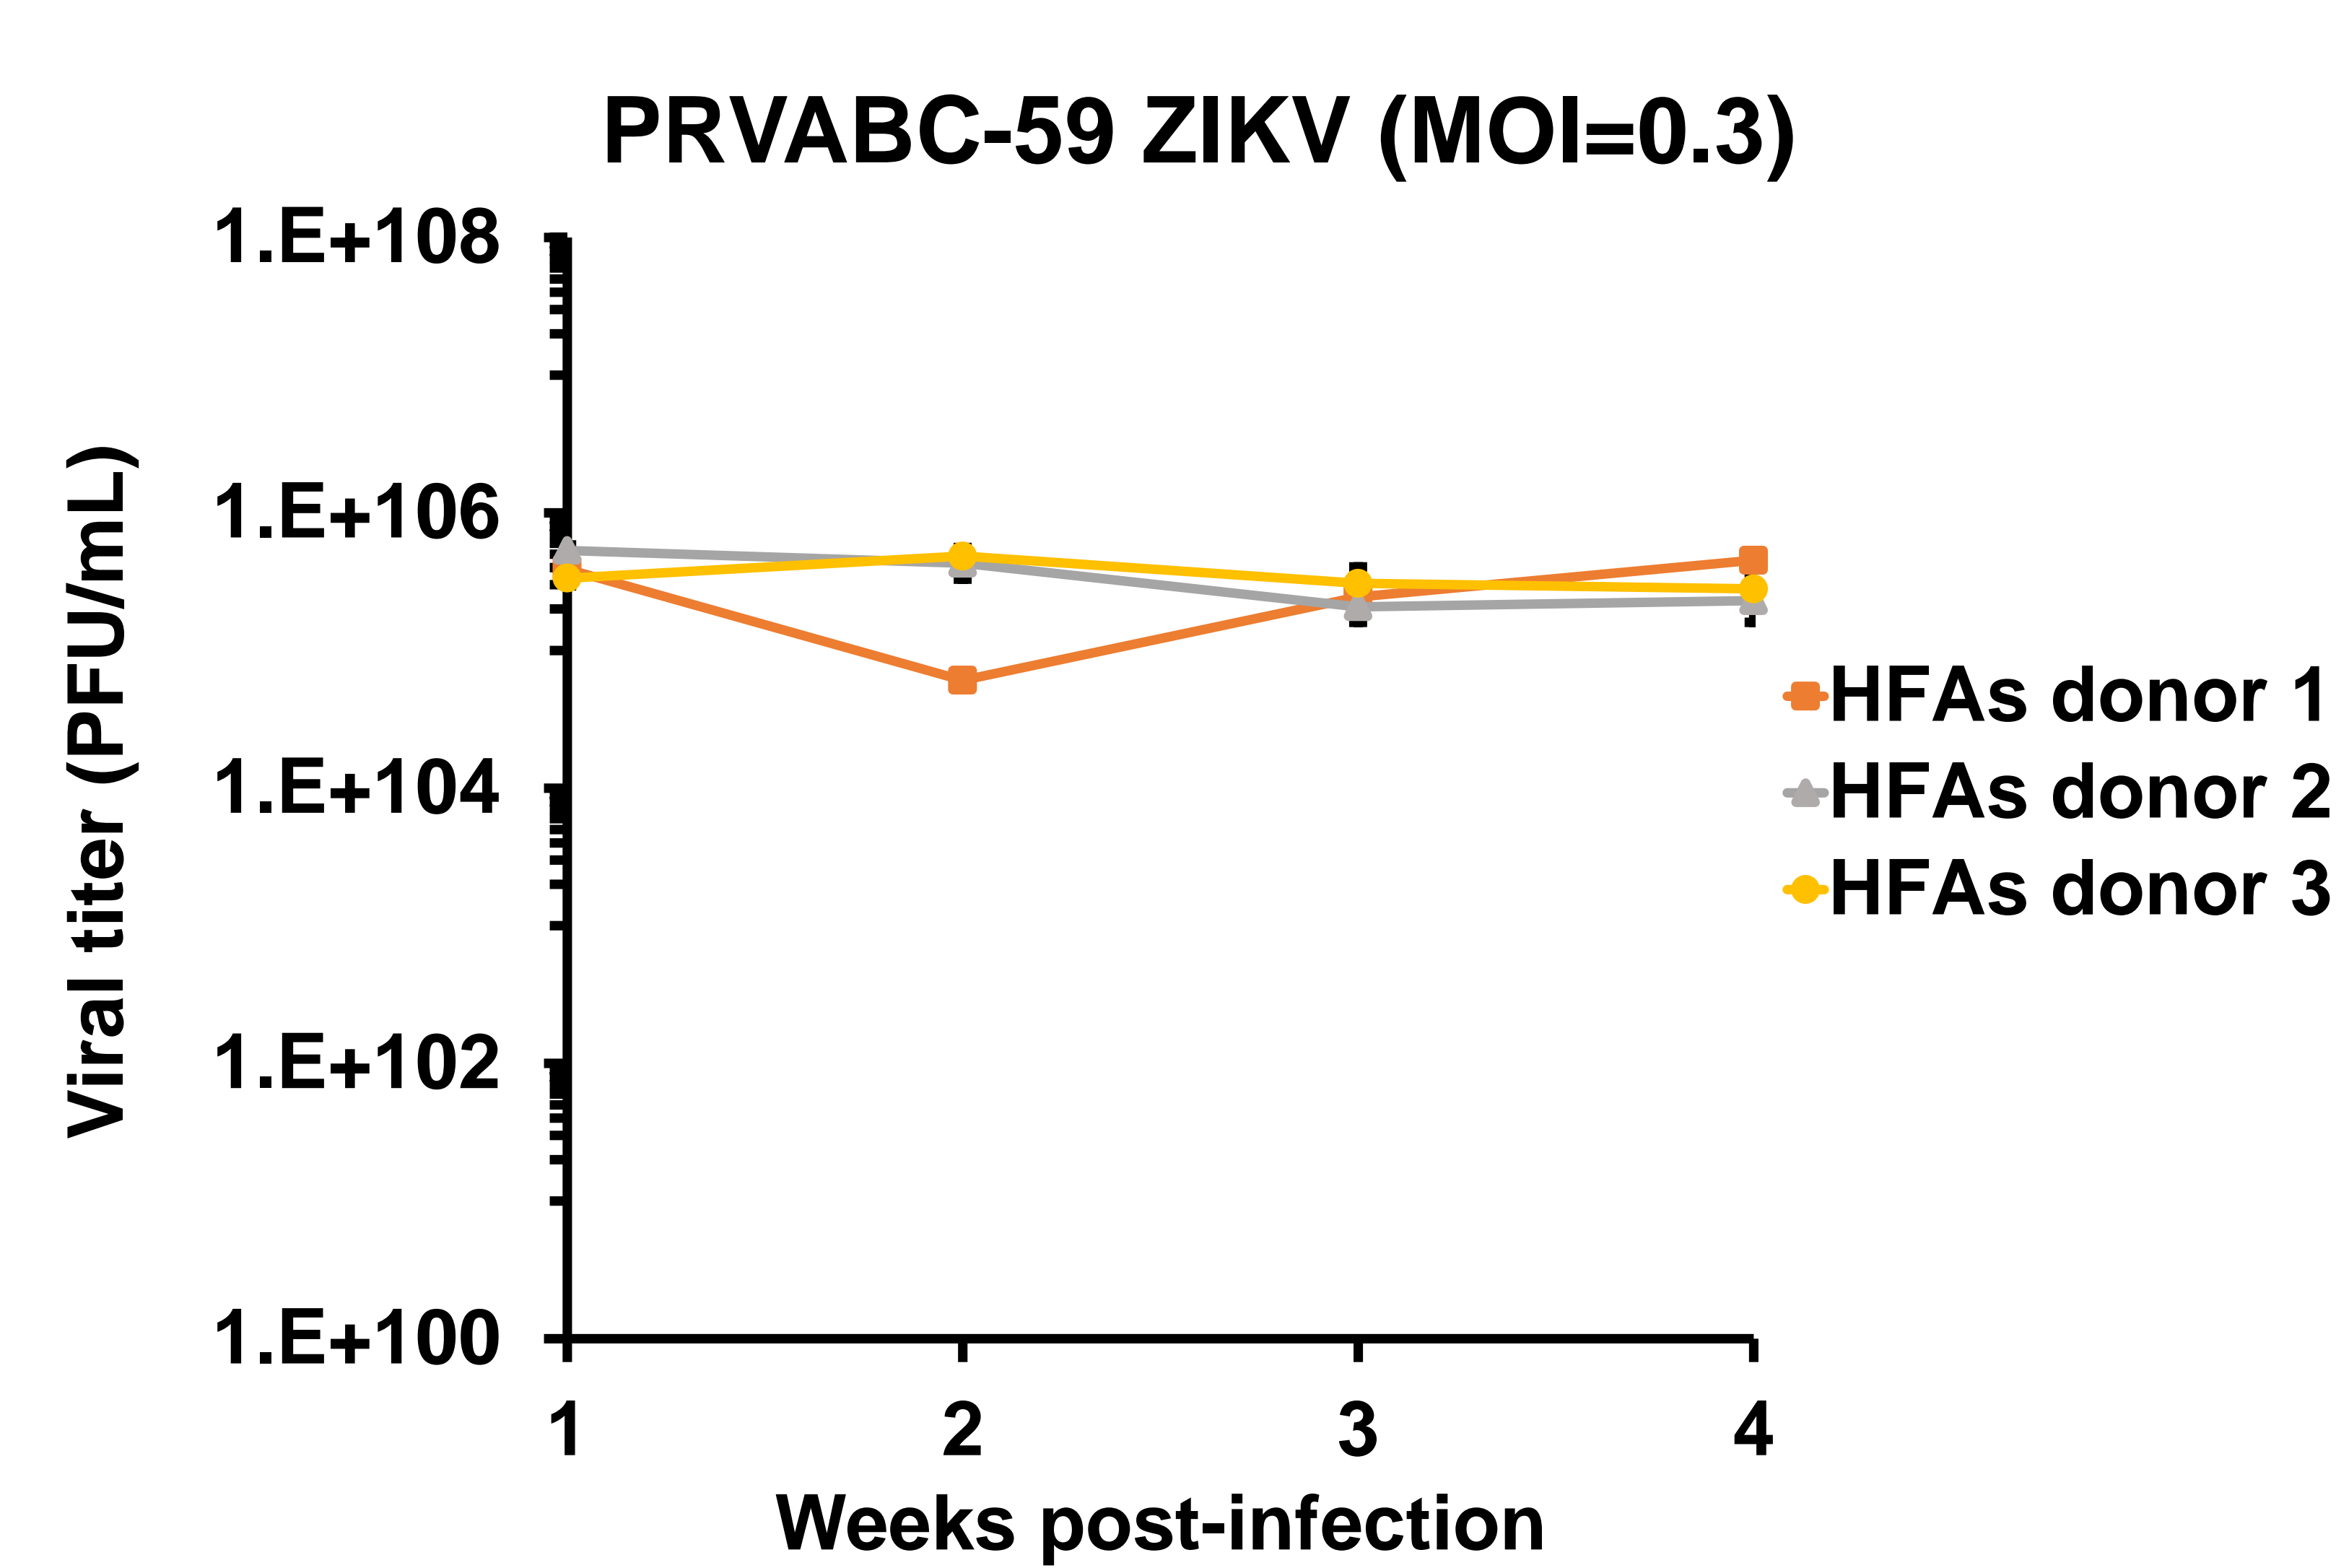

G

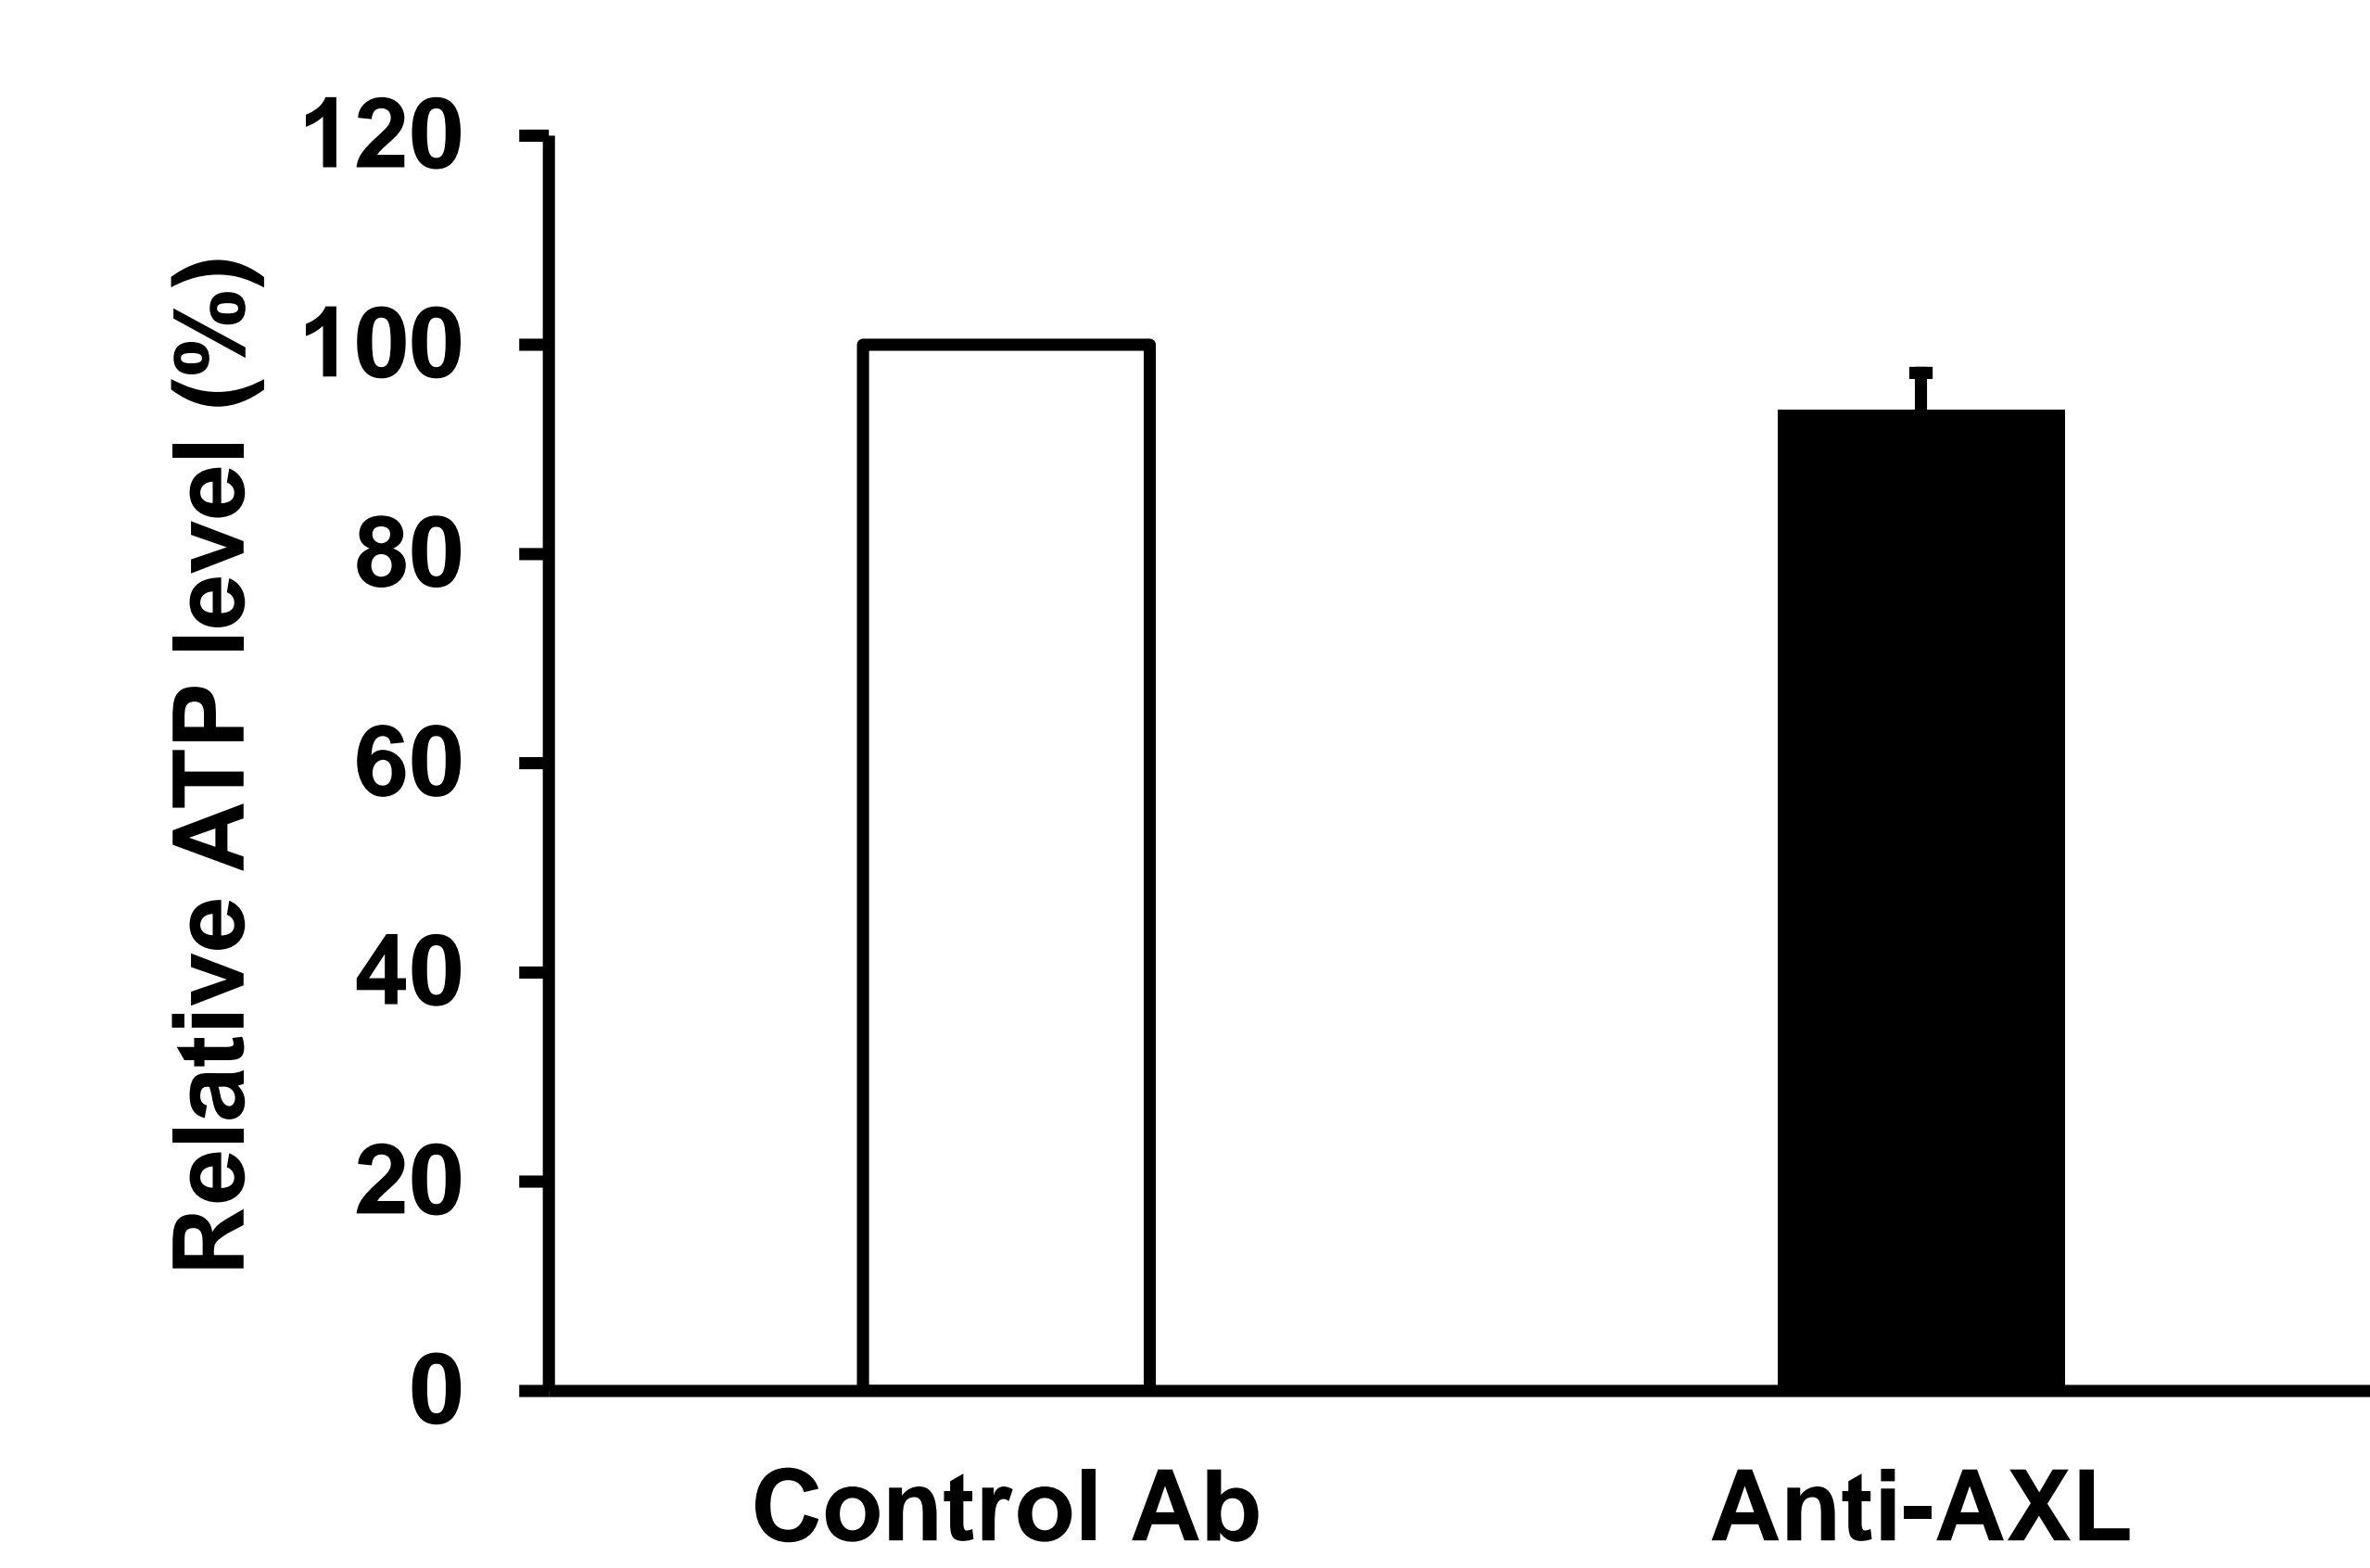

Figure S5

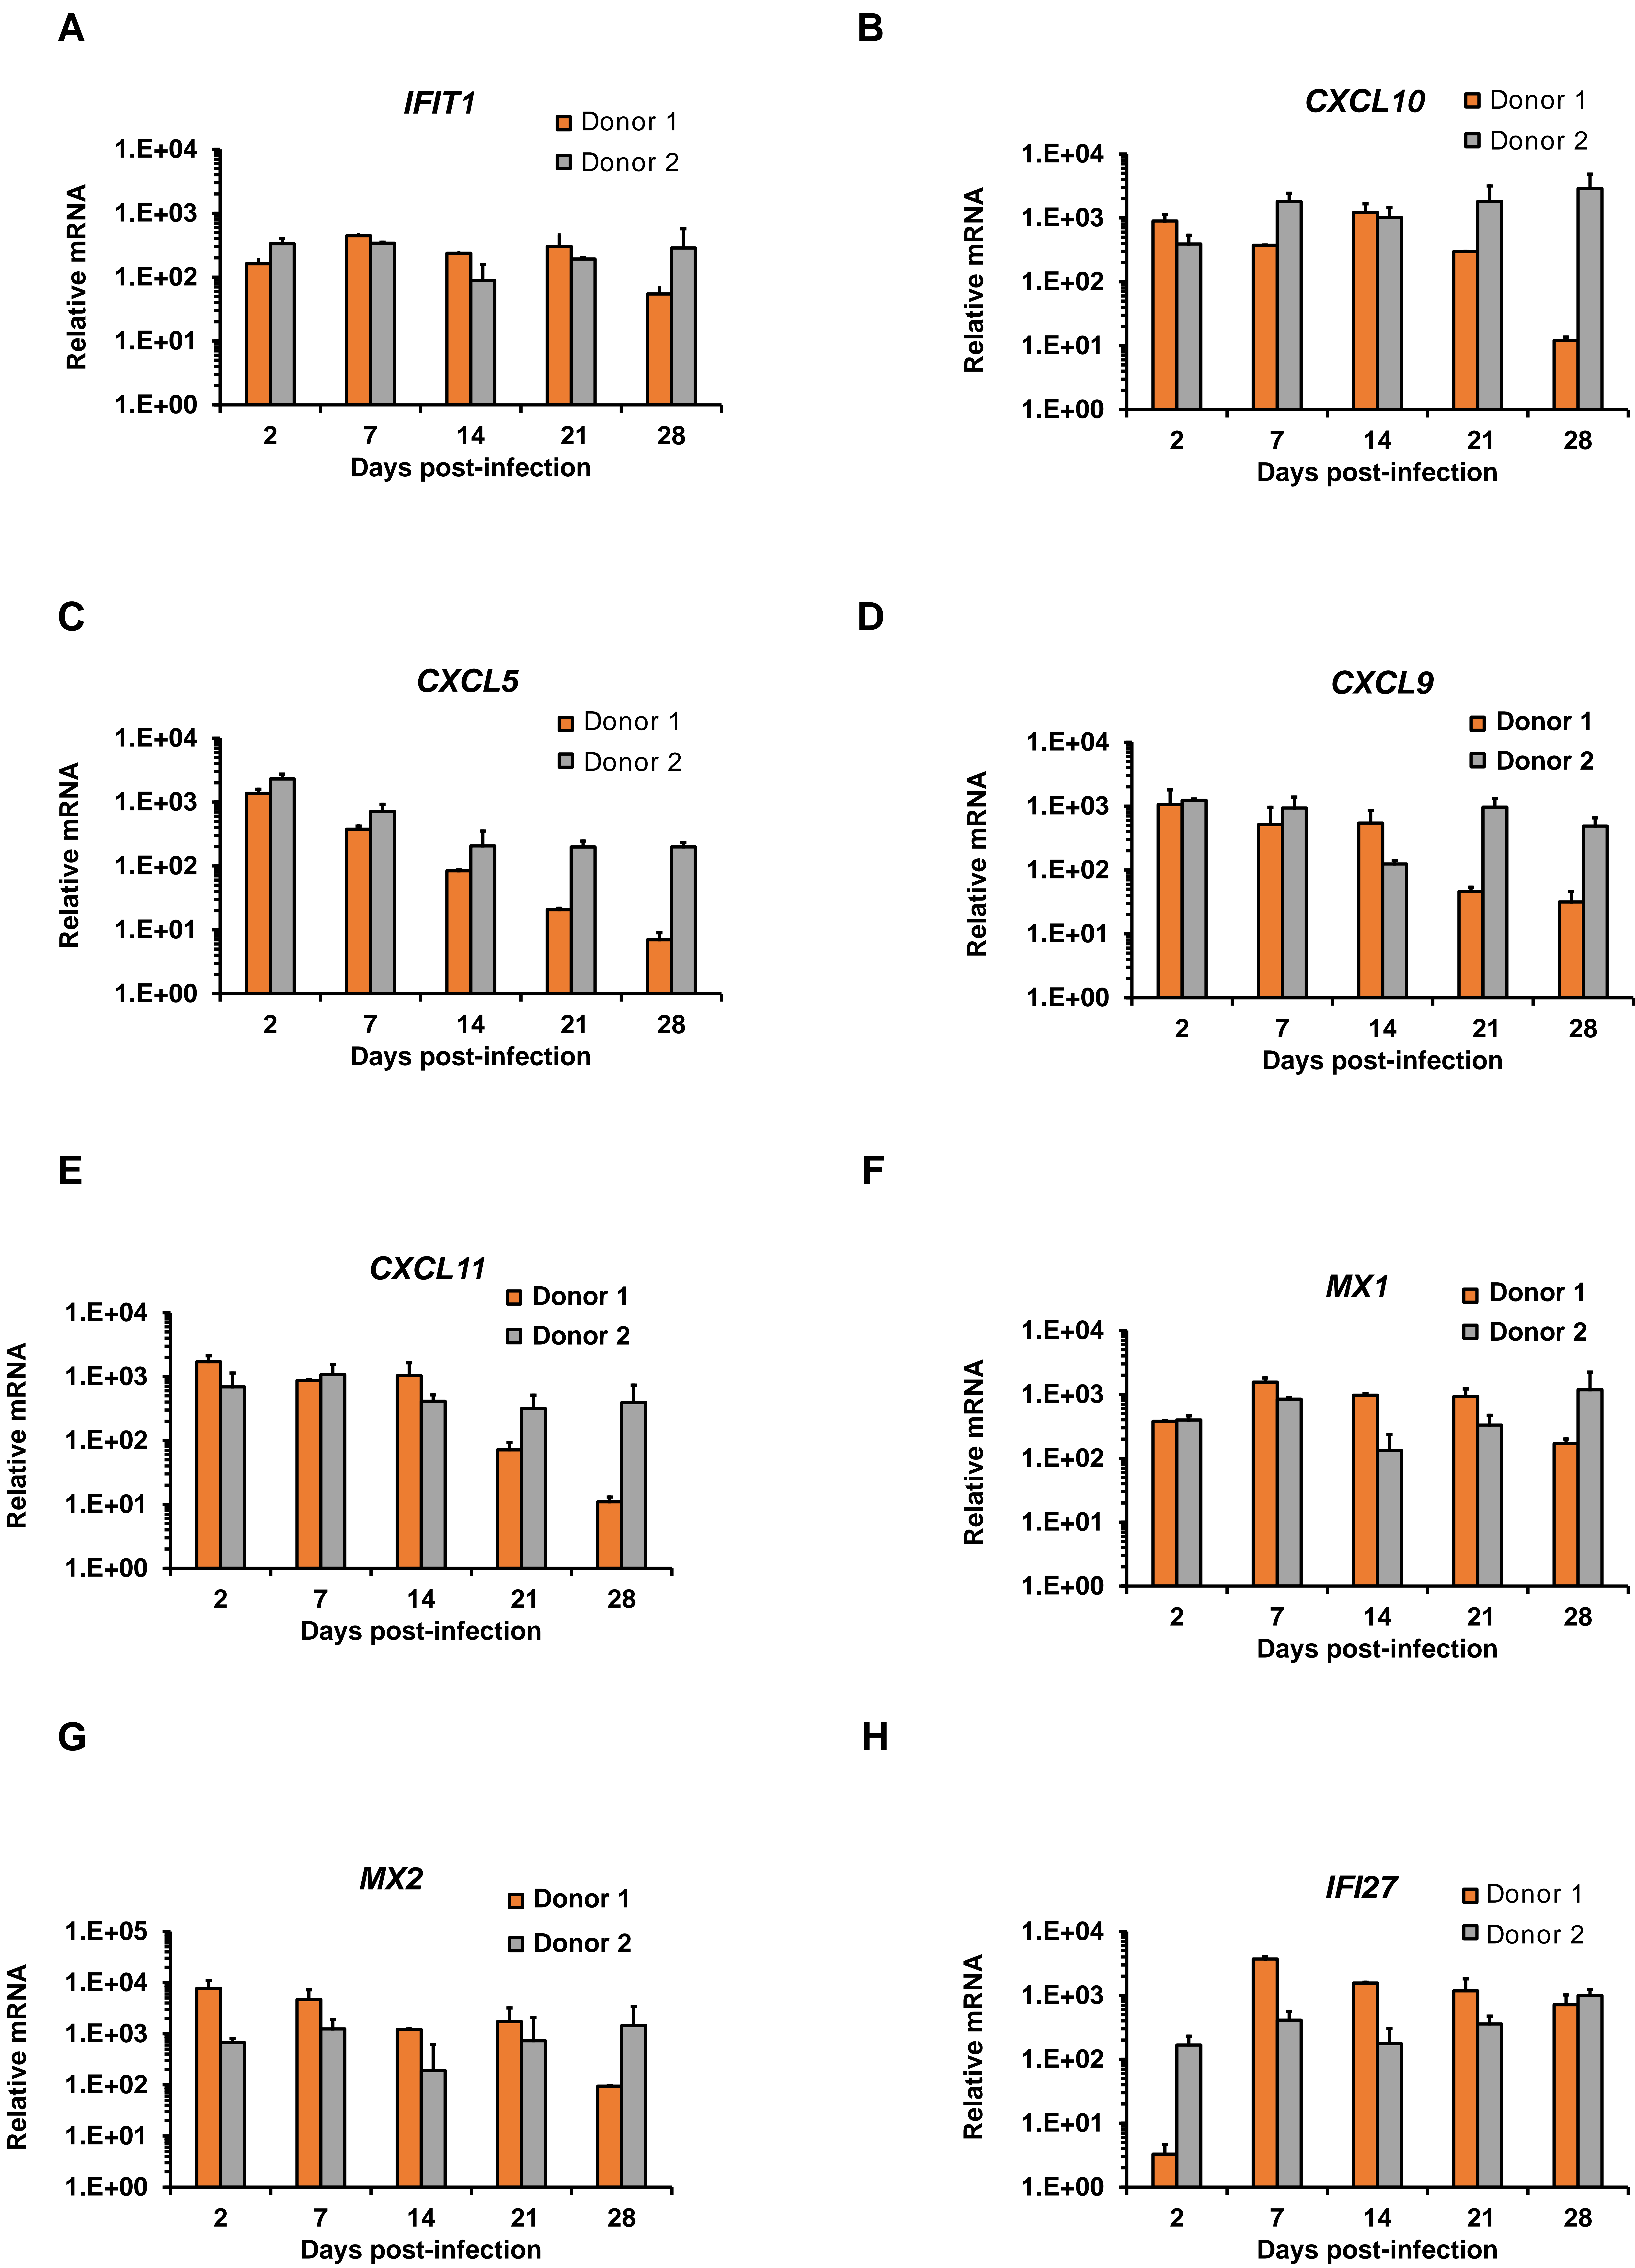

Figure S5

I

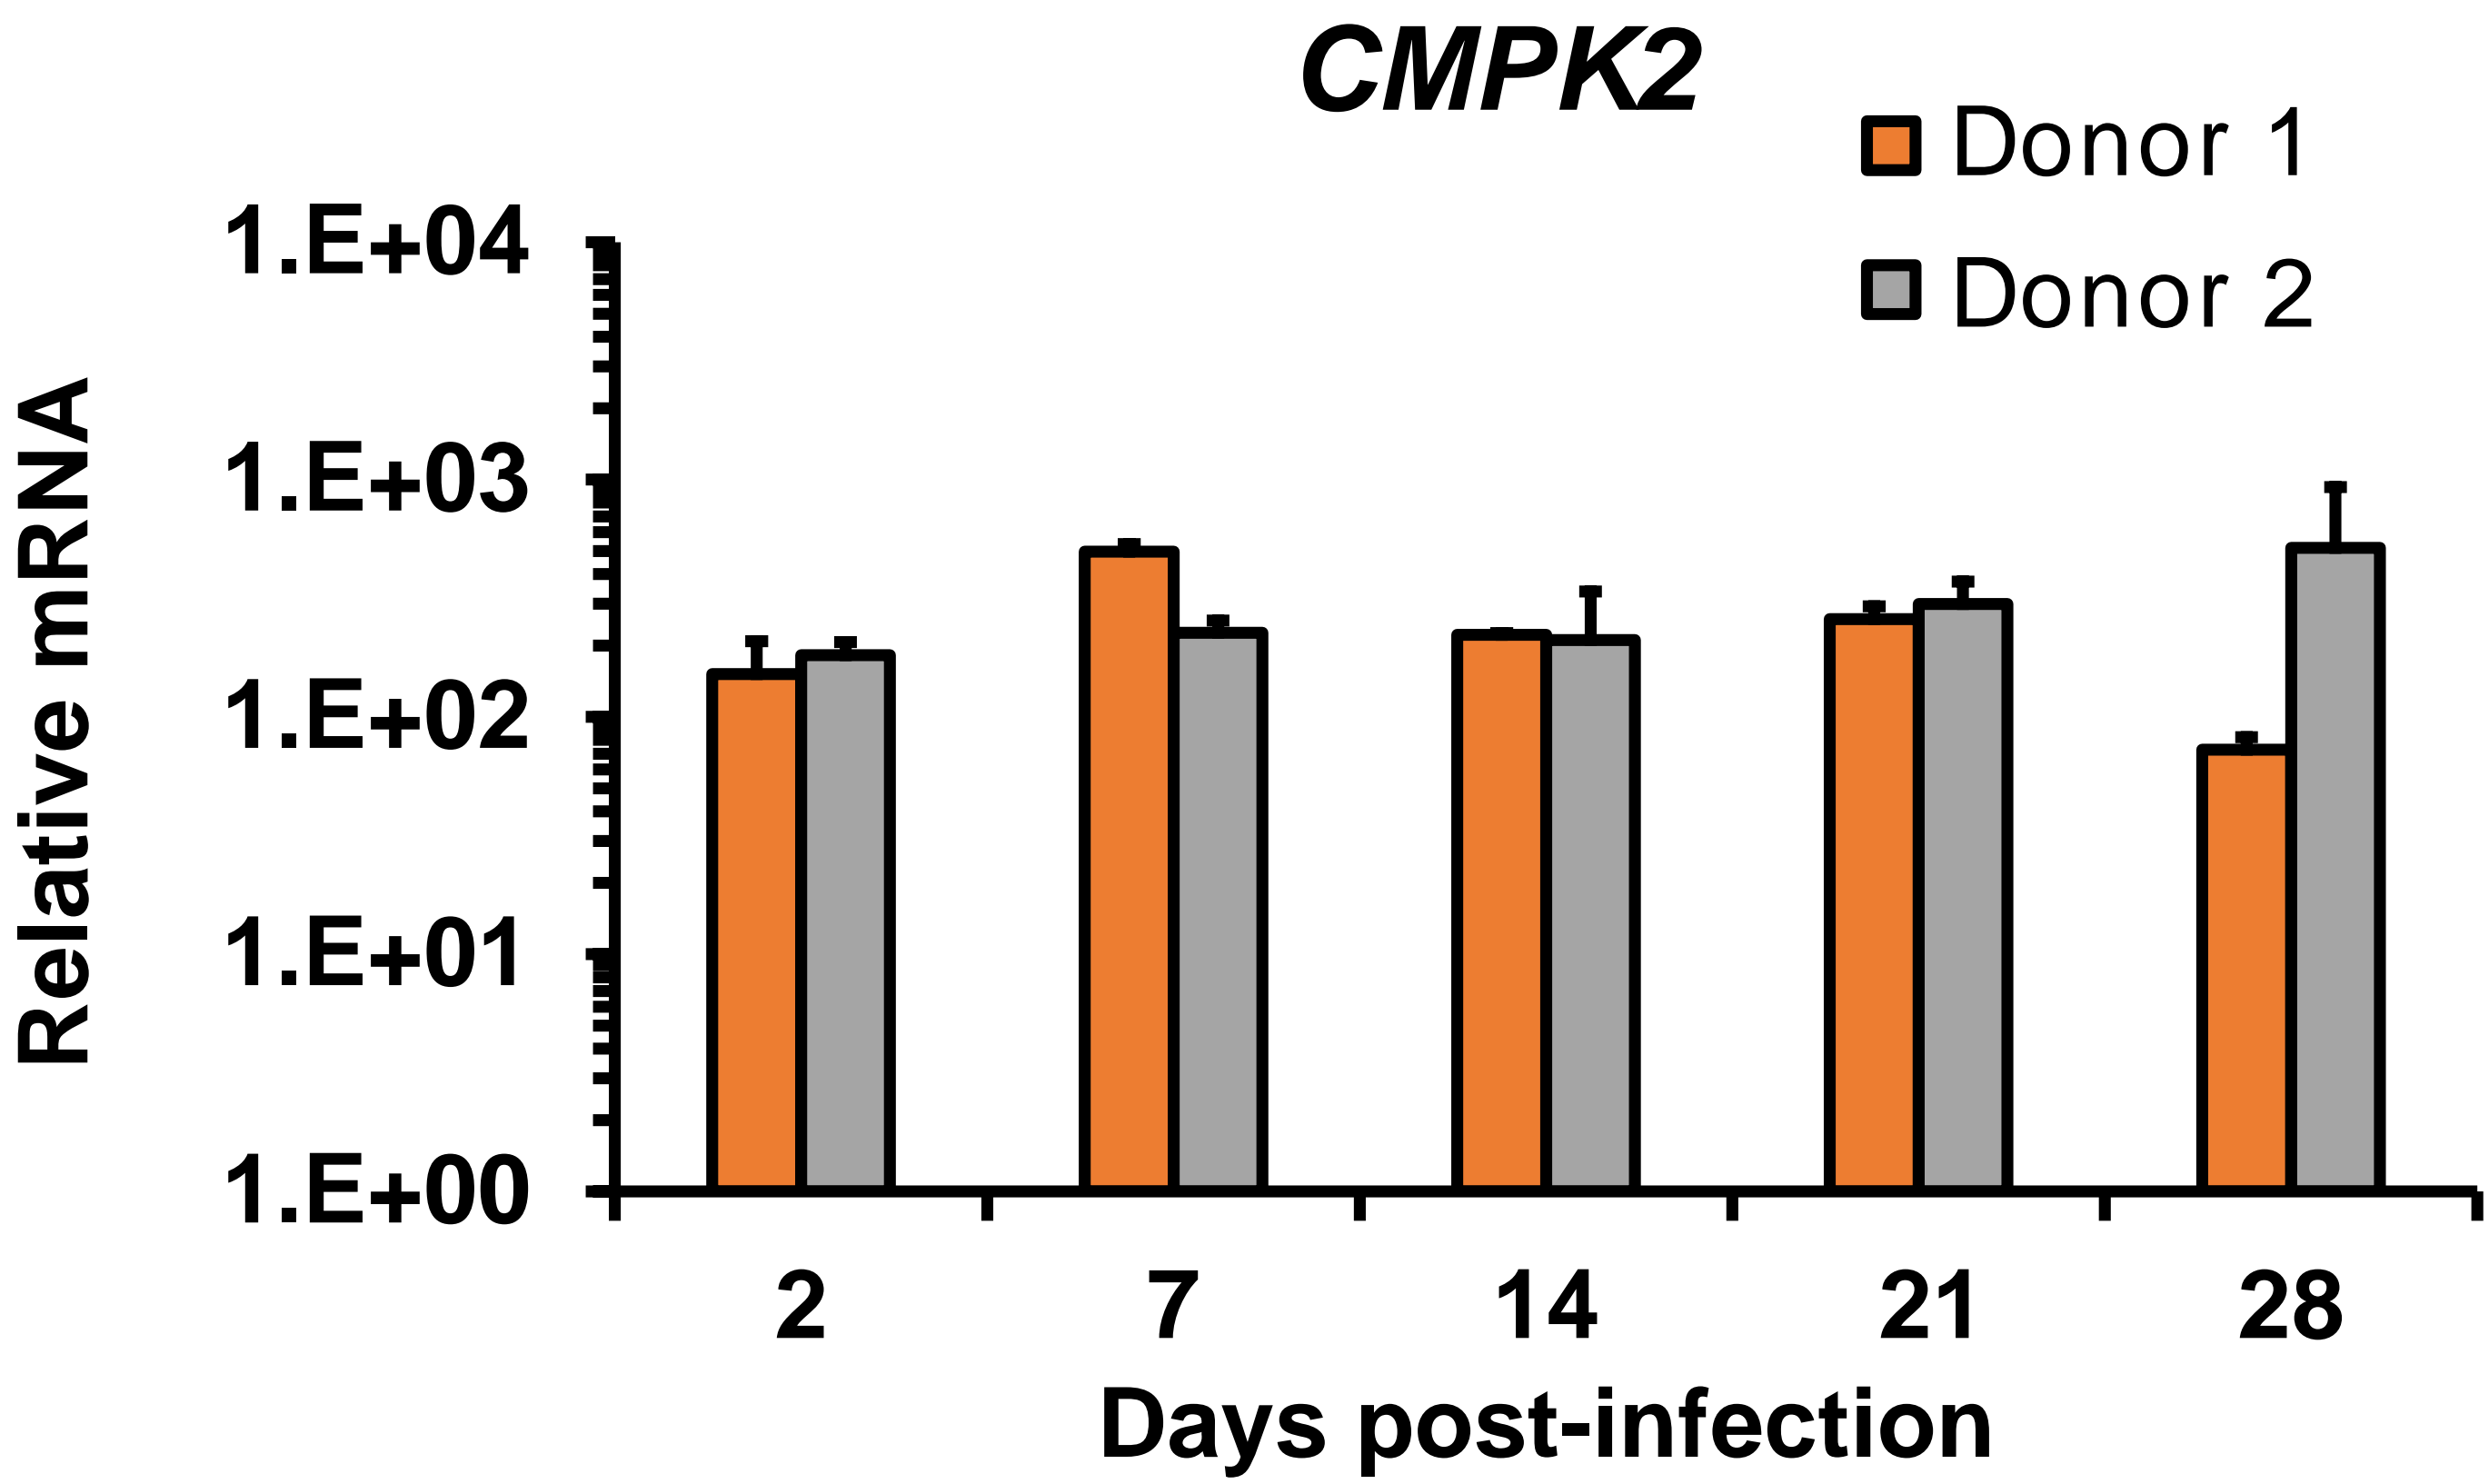

J

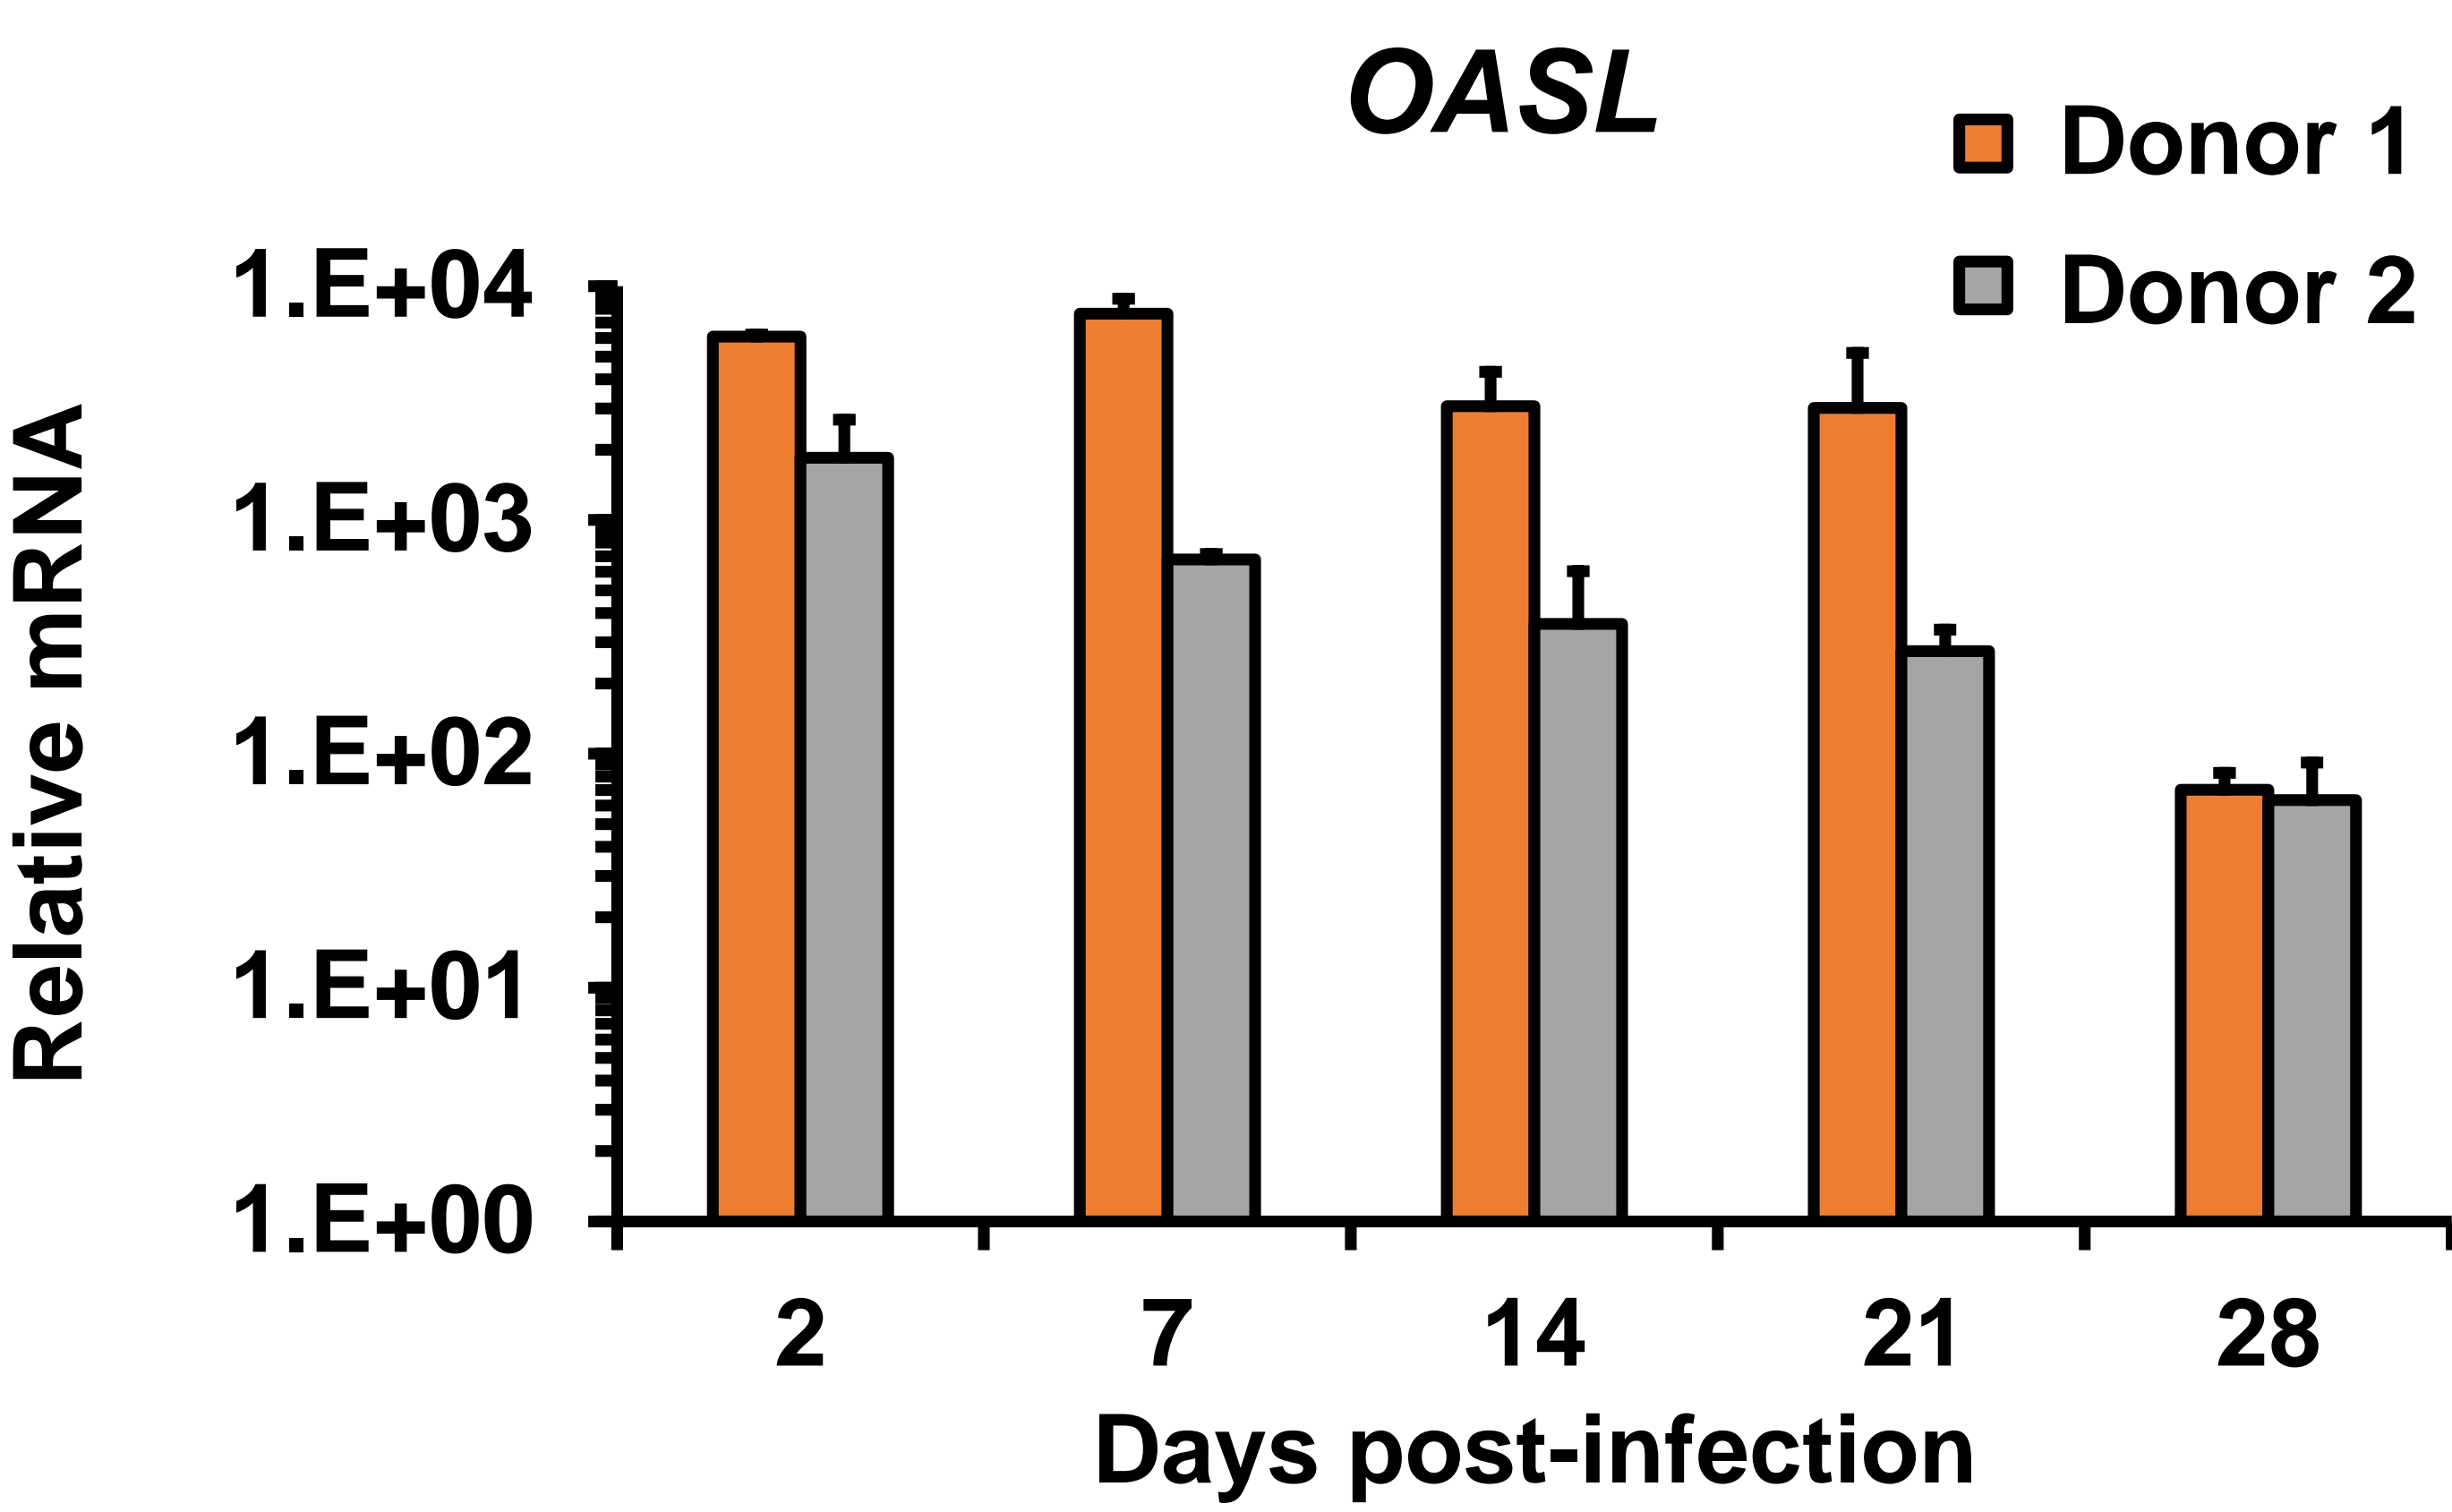

K

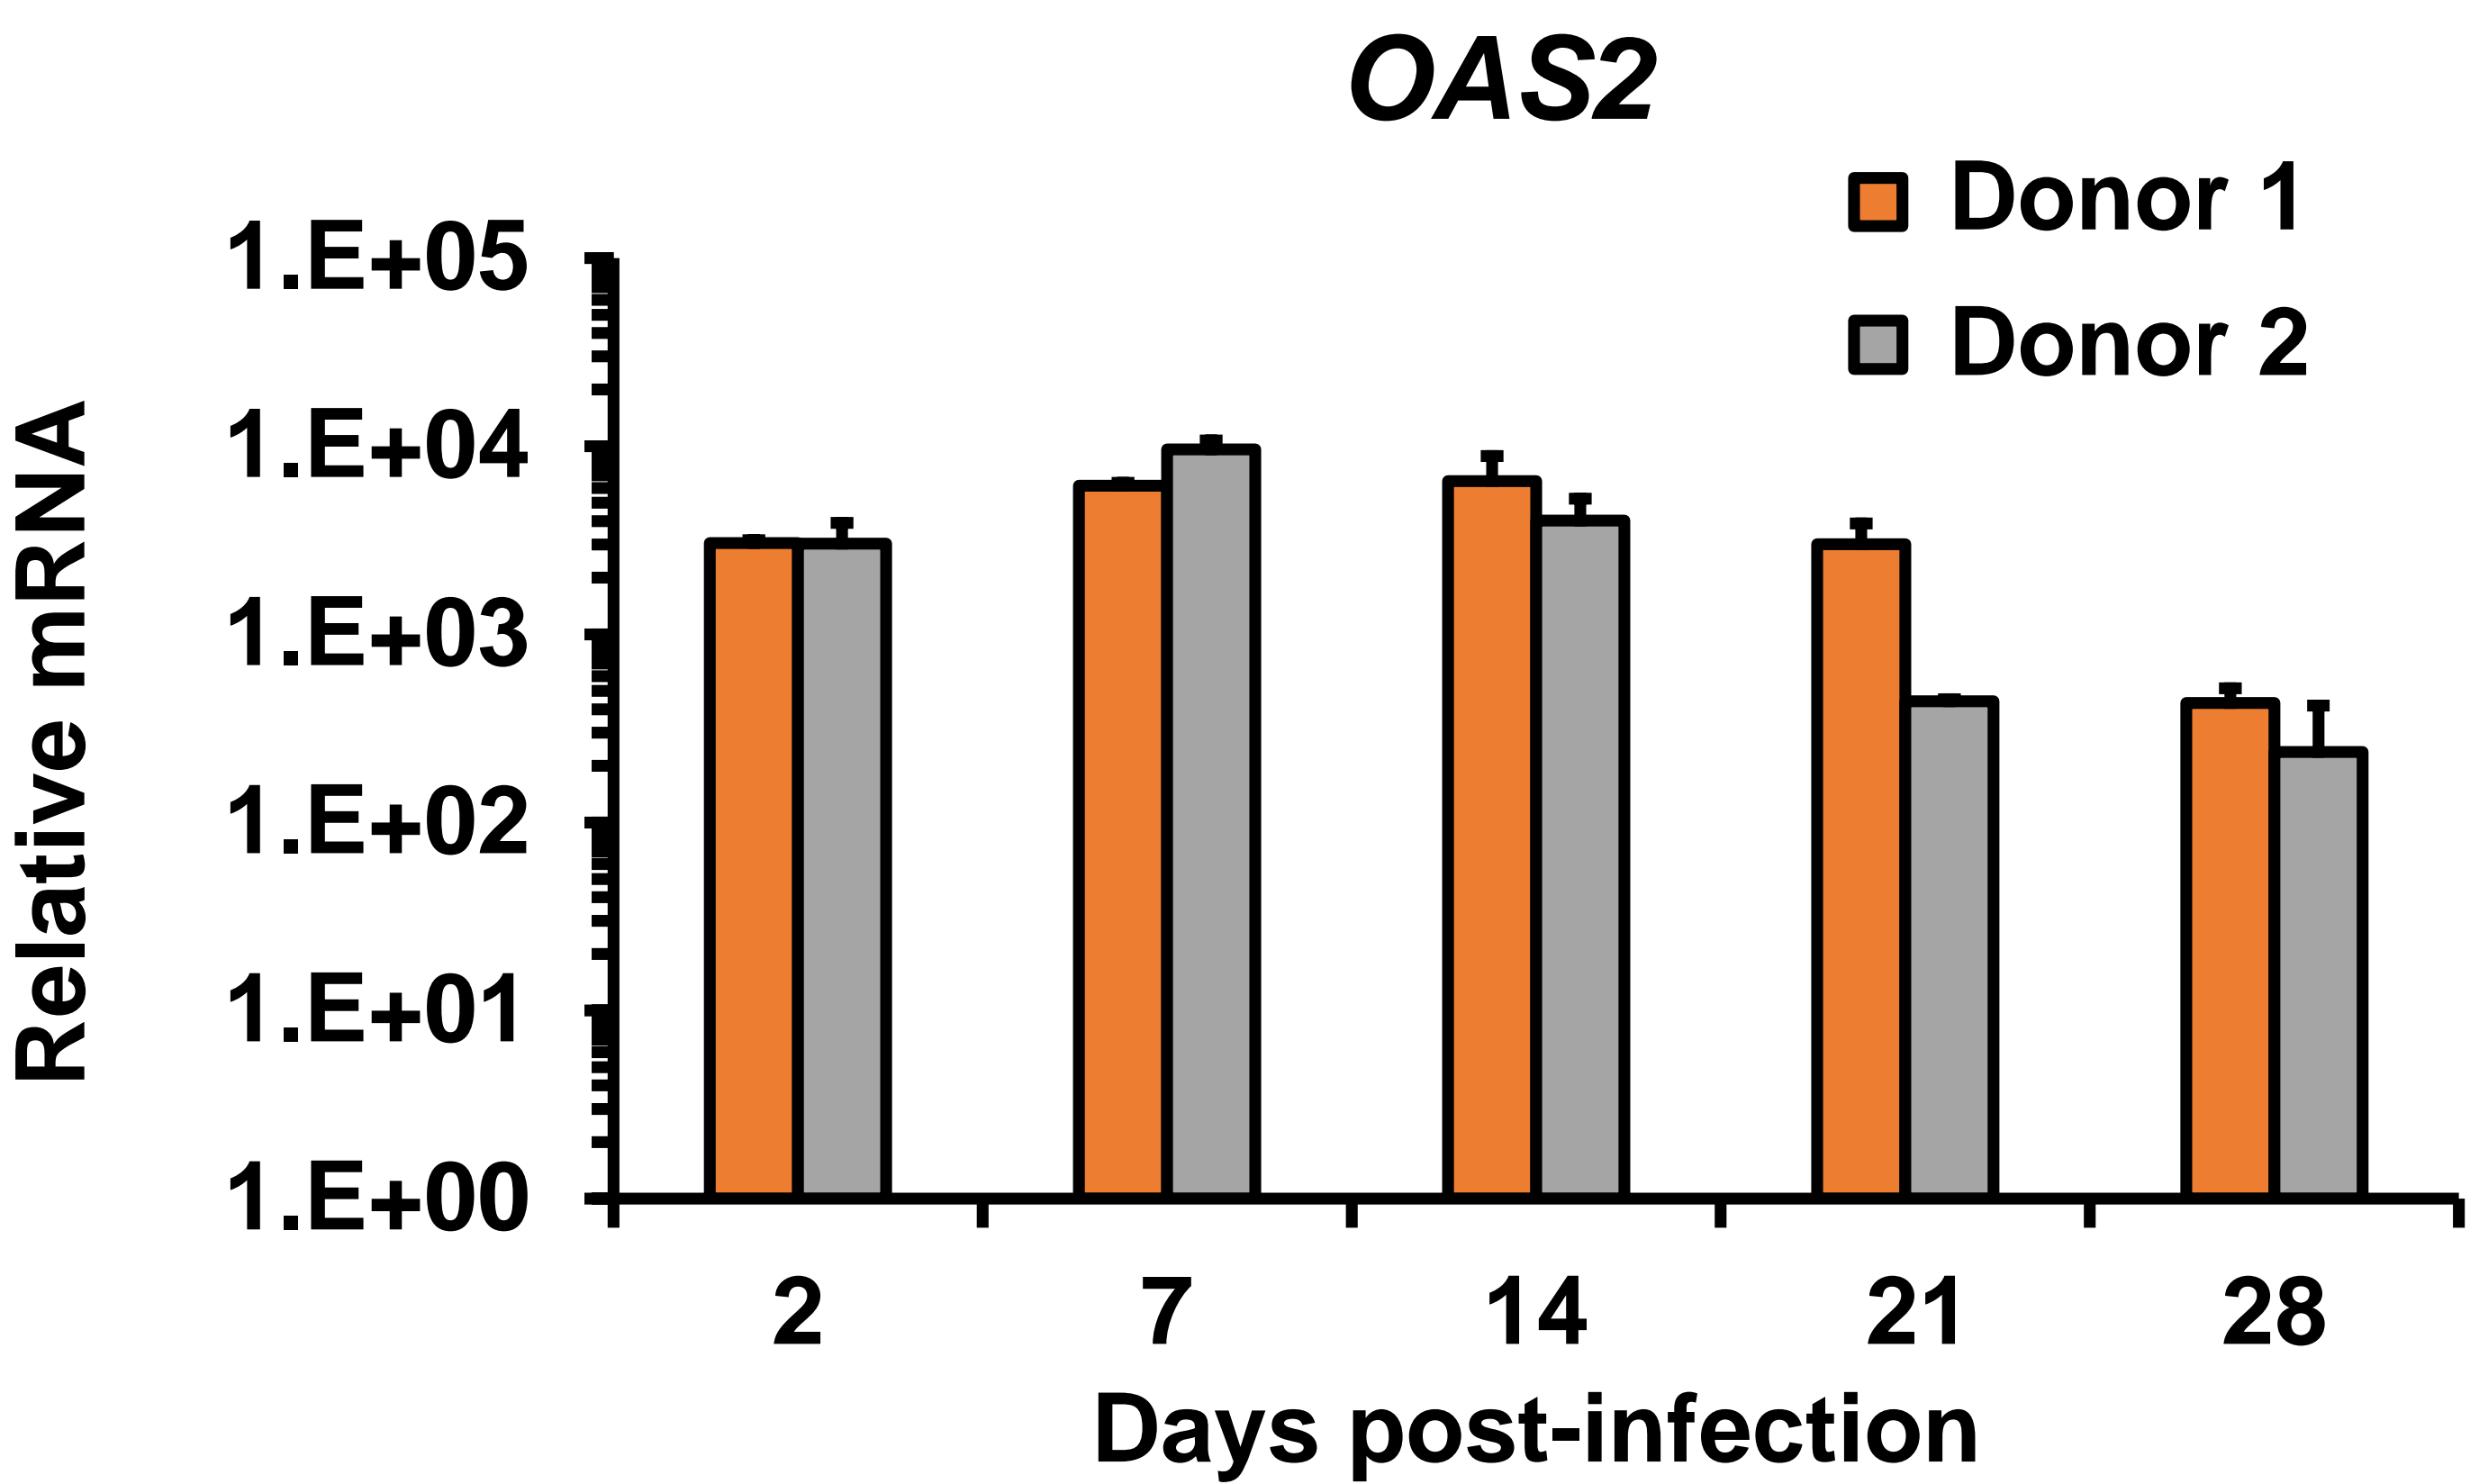

L

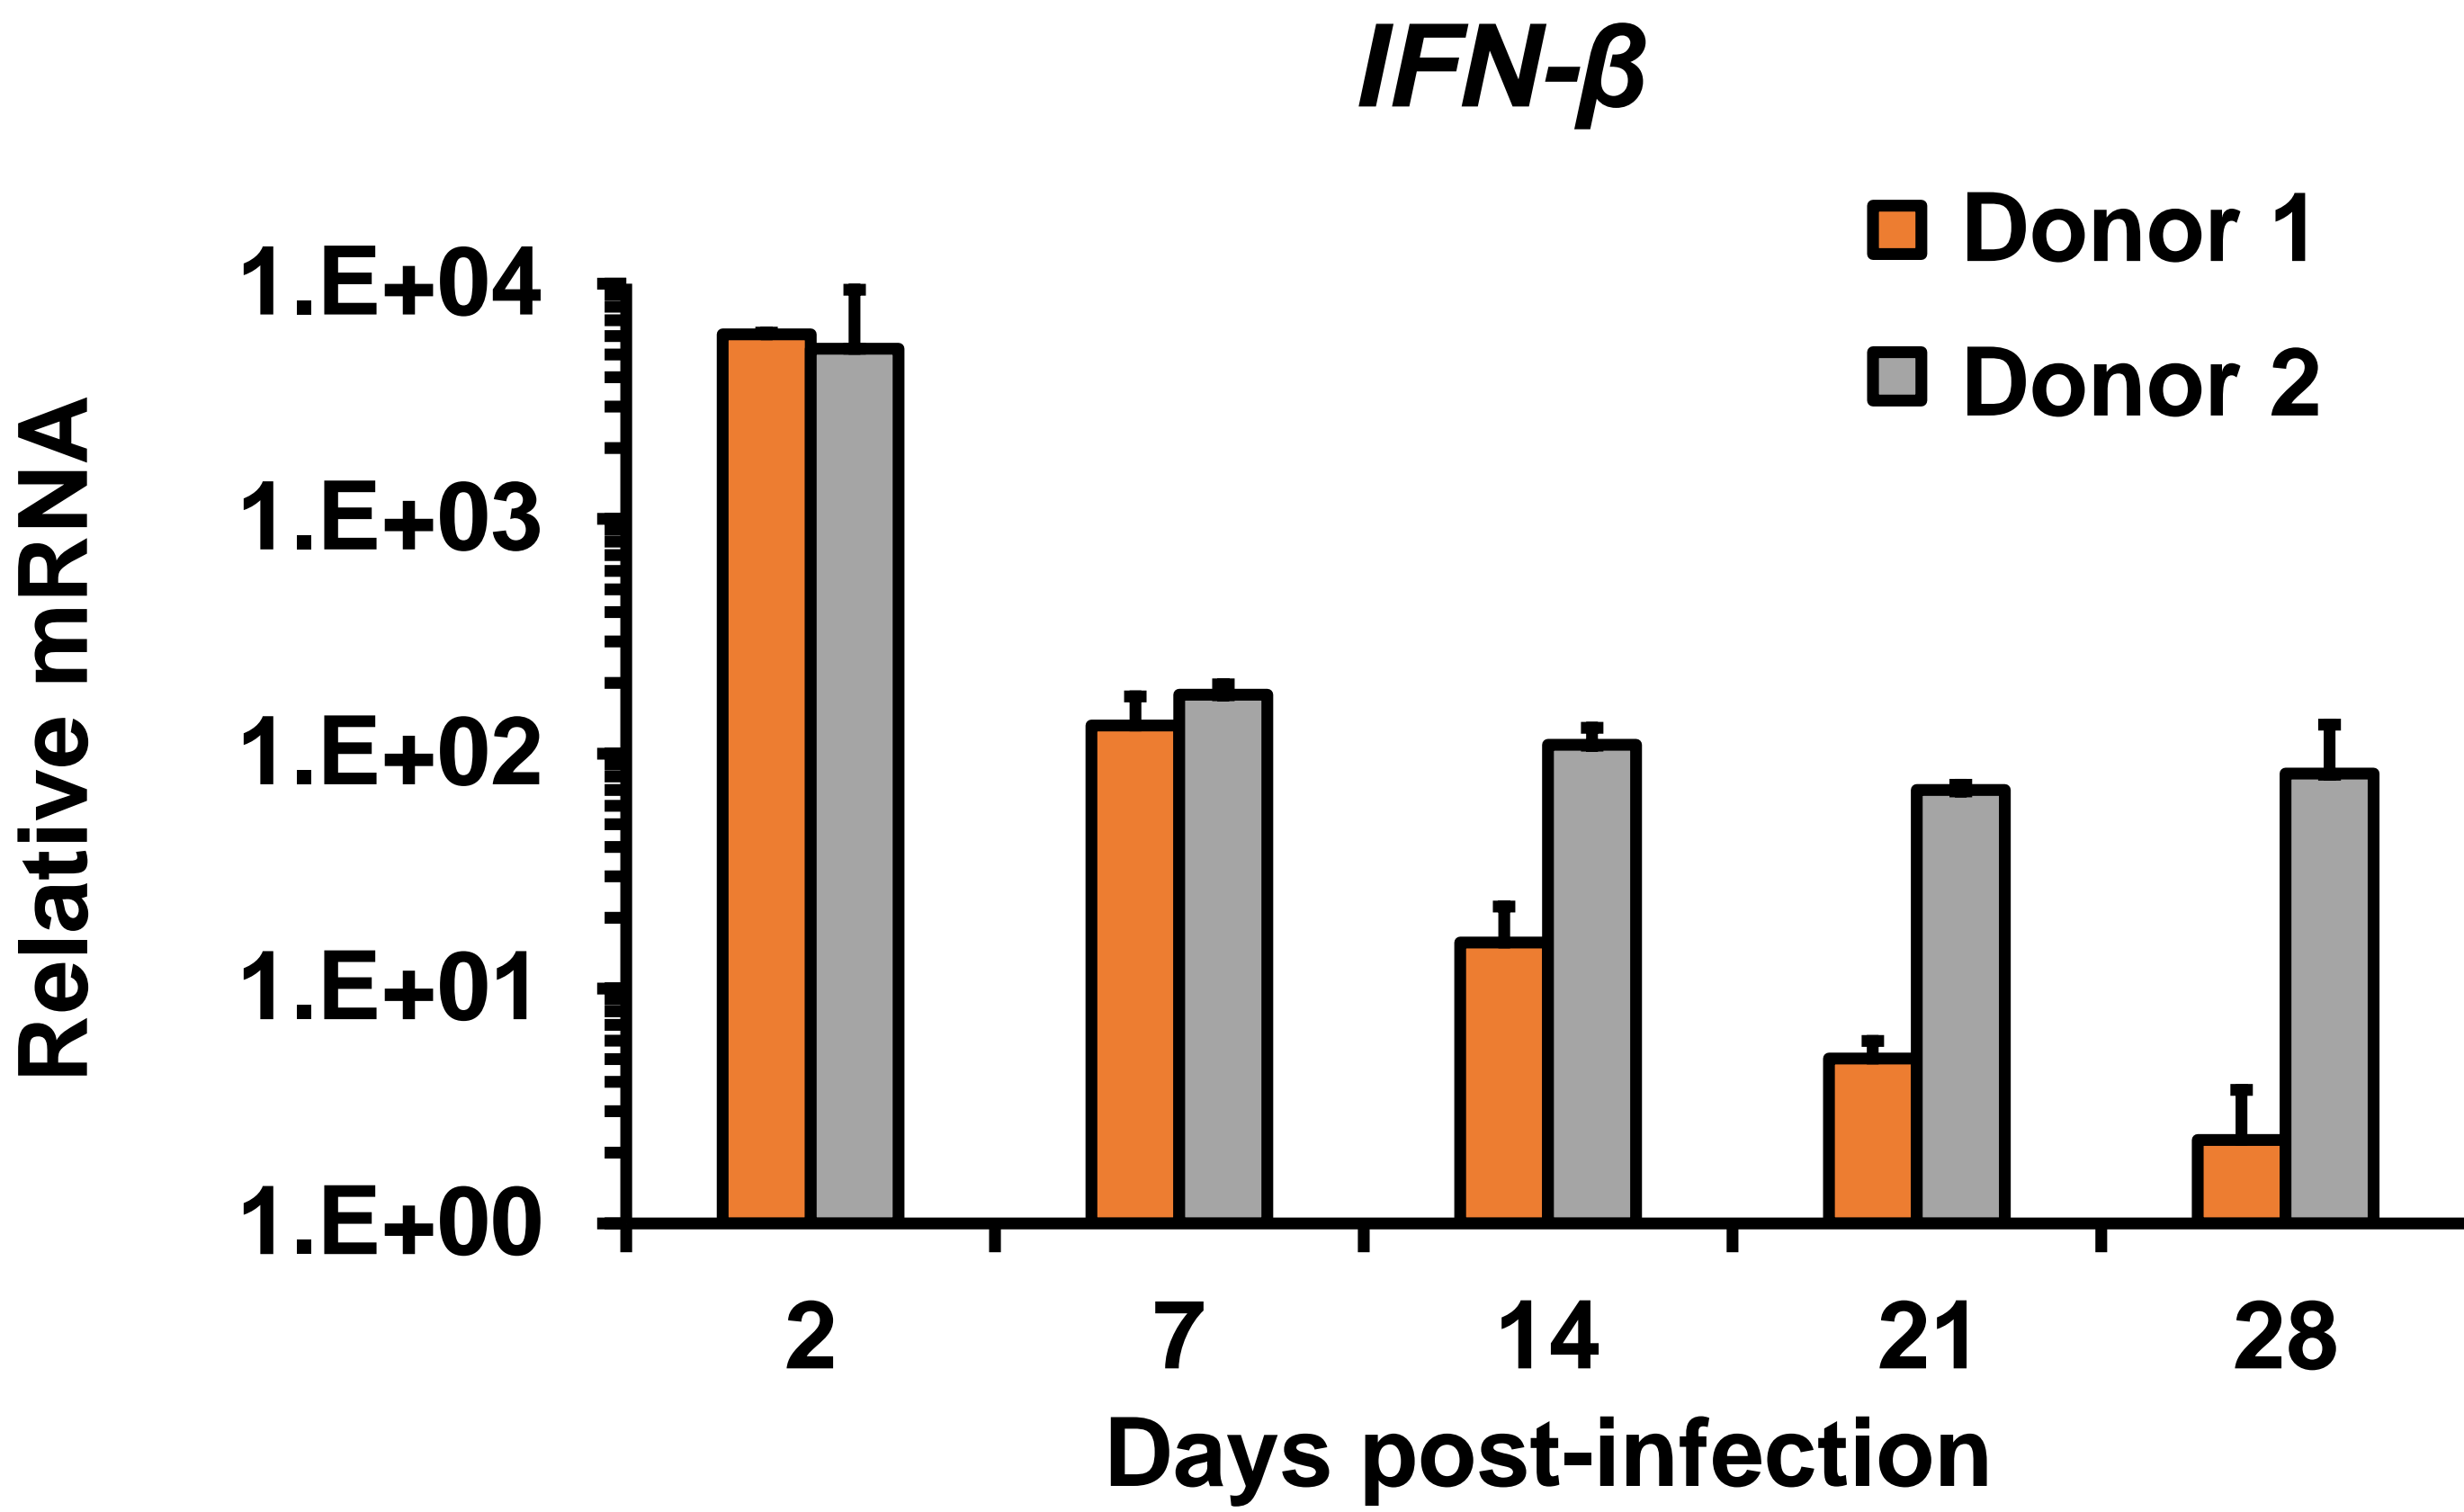

M

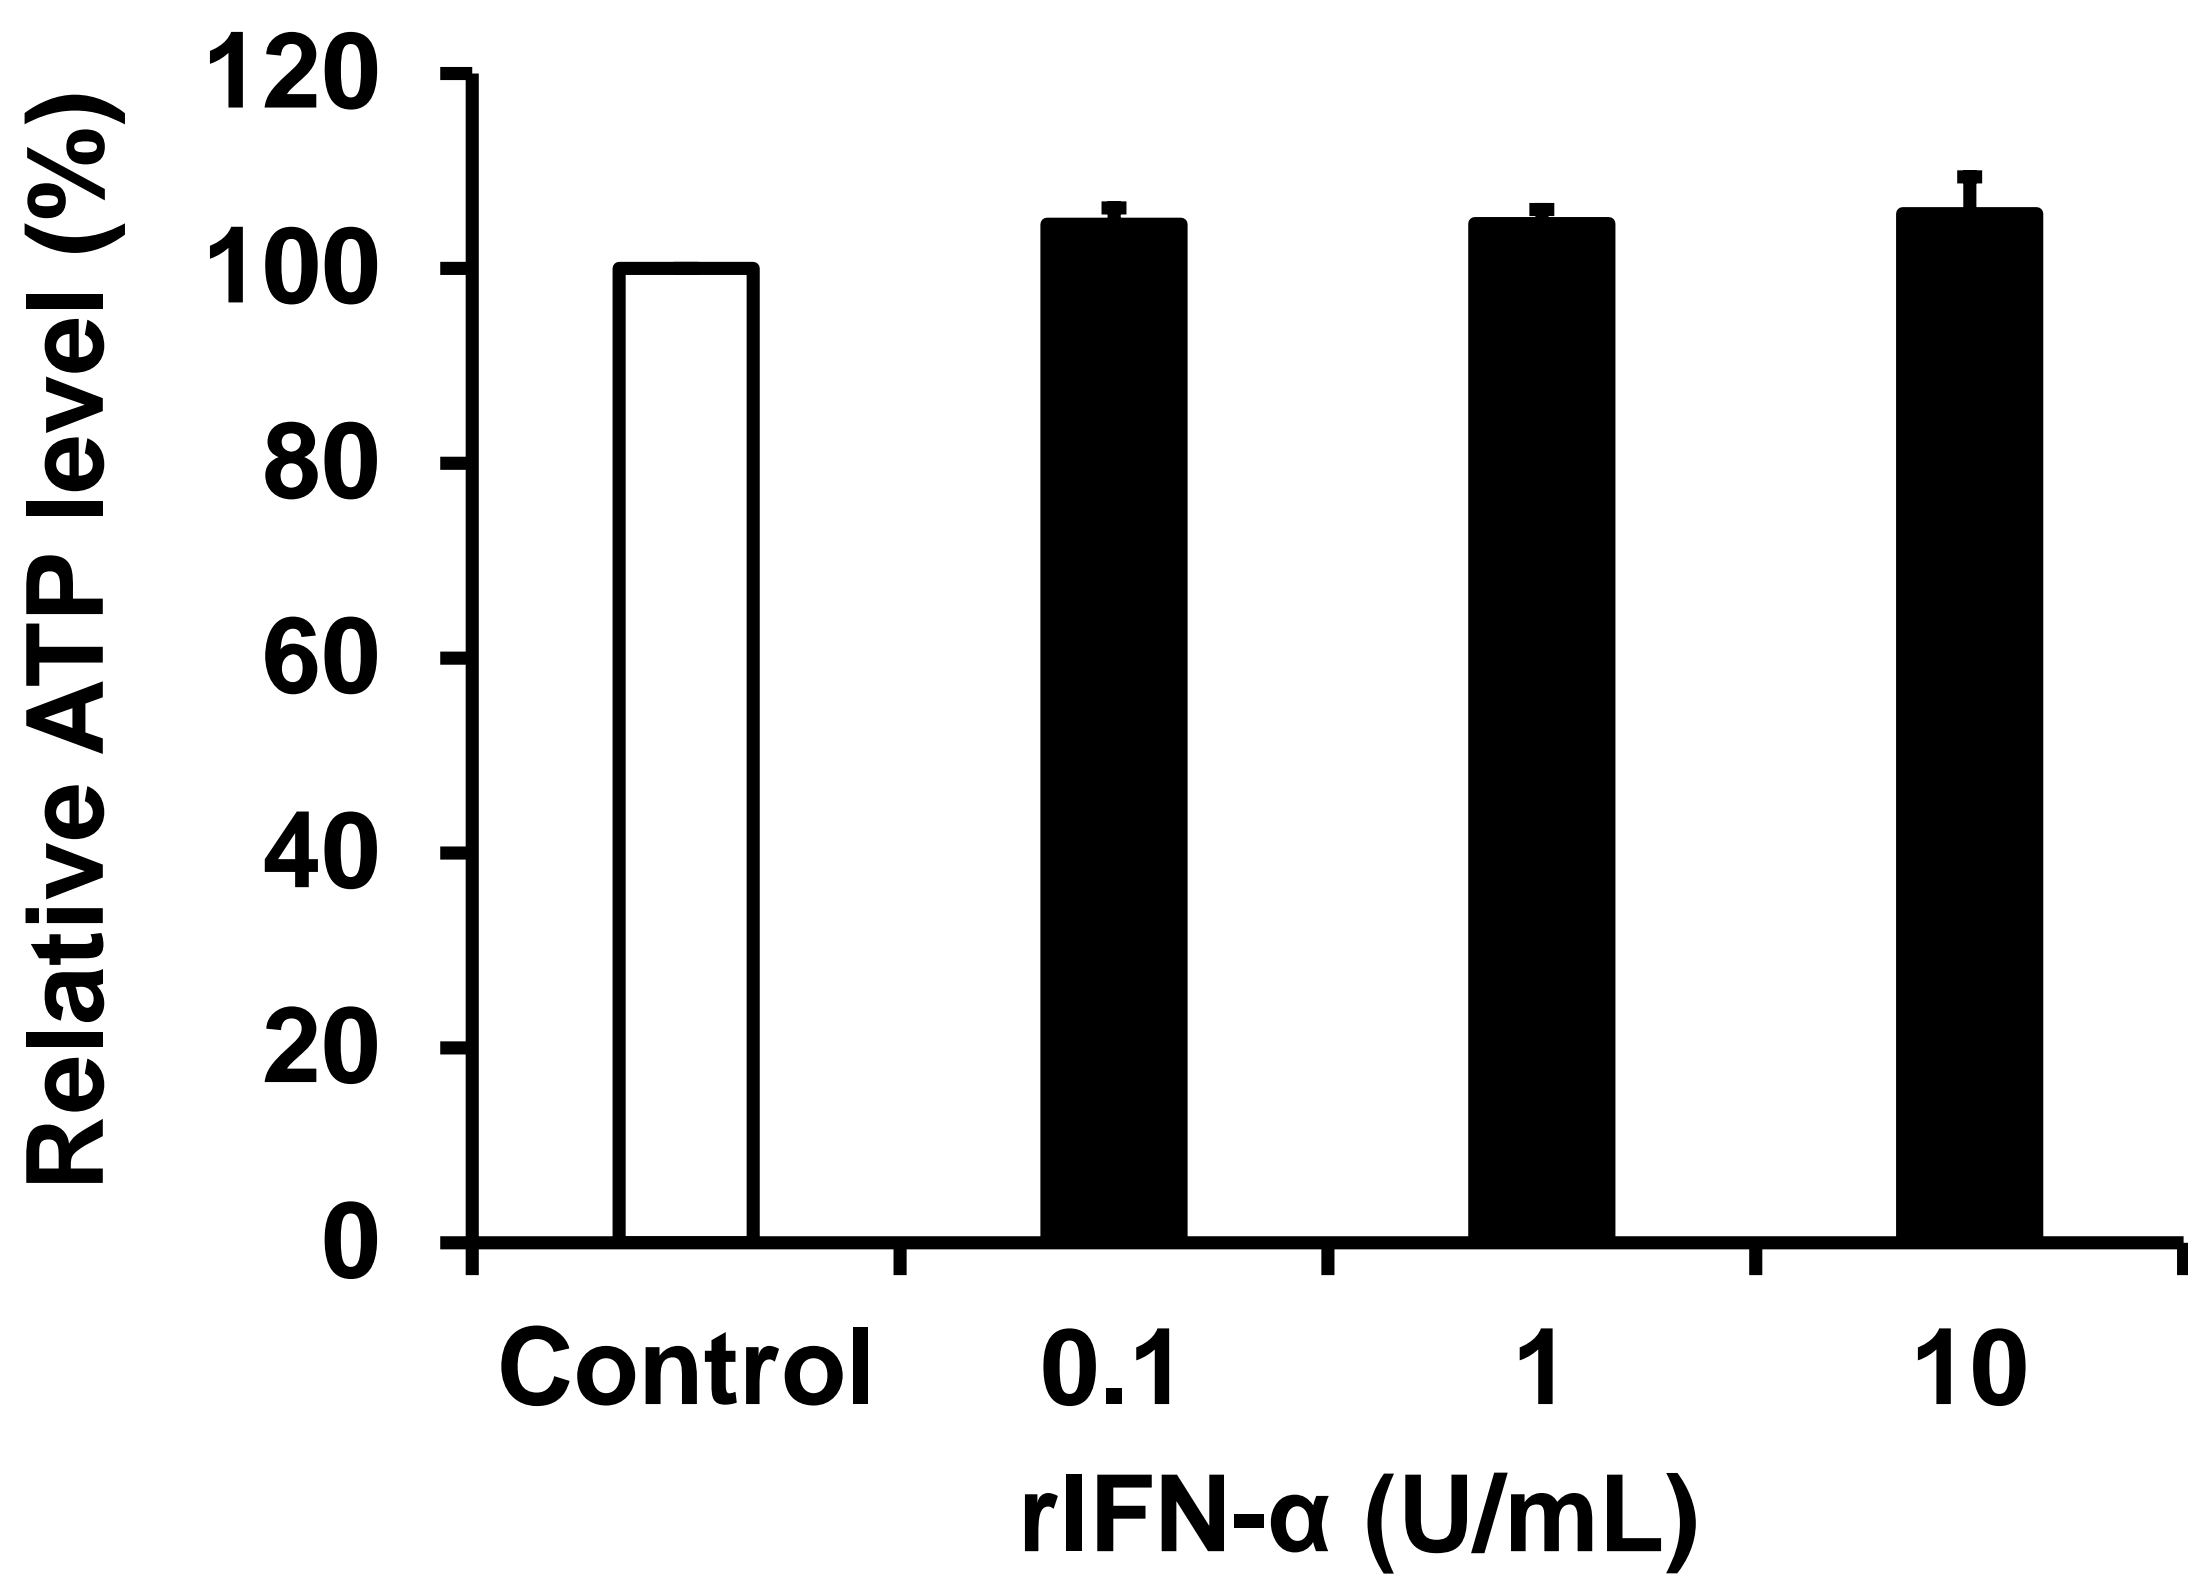

N

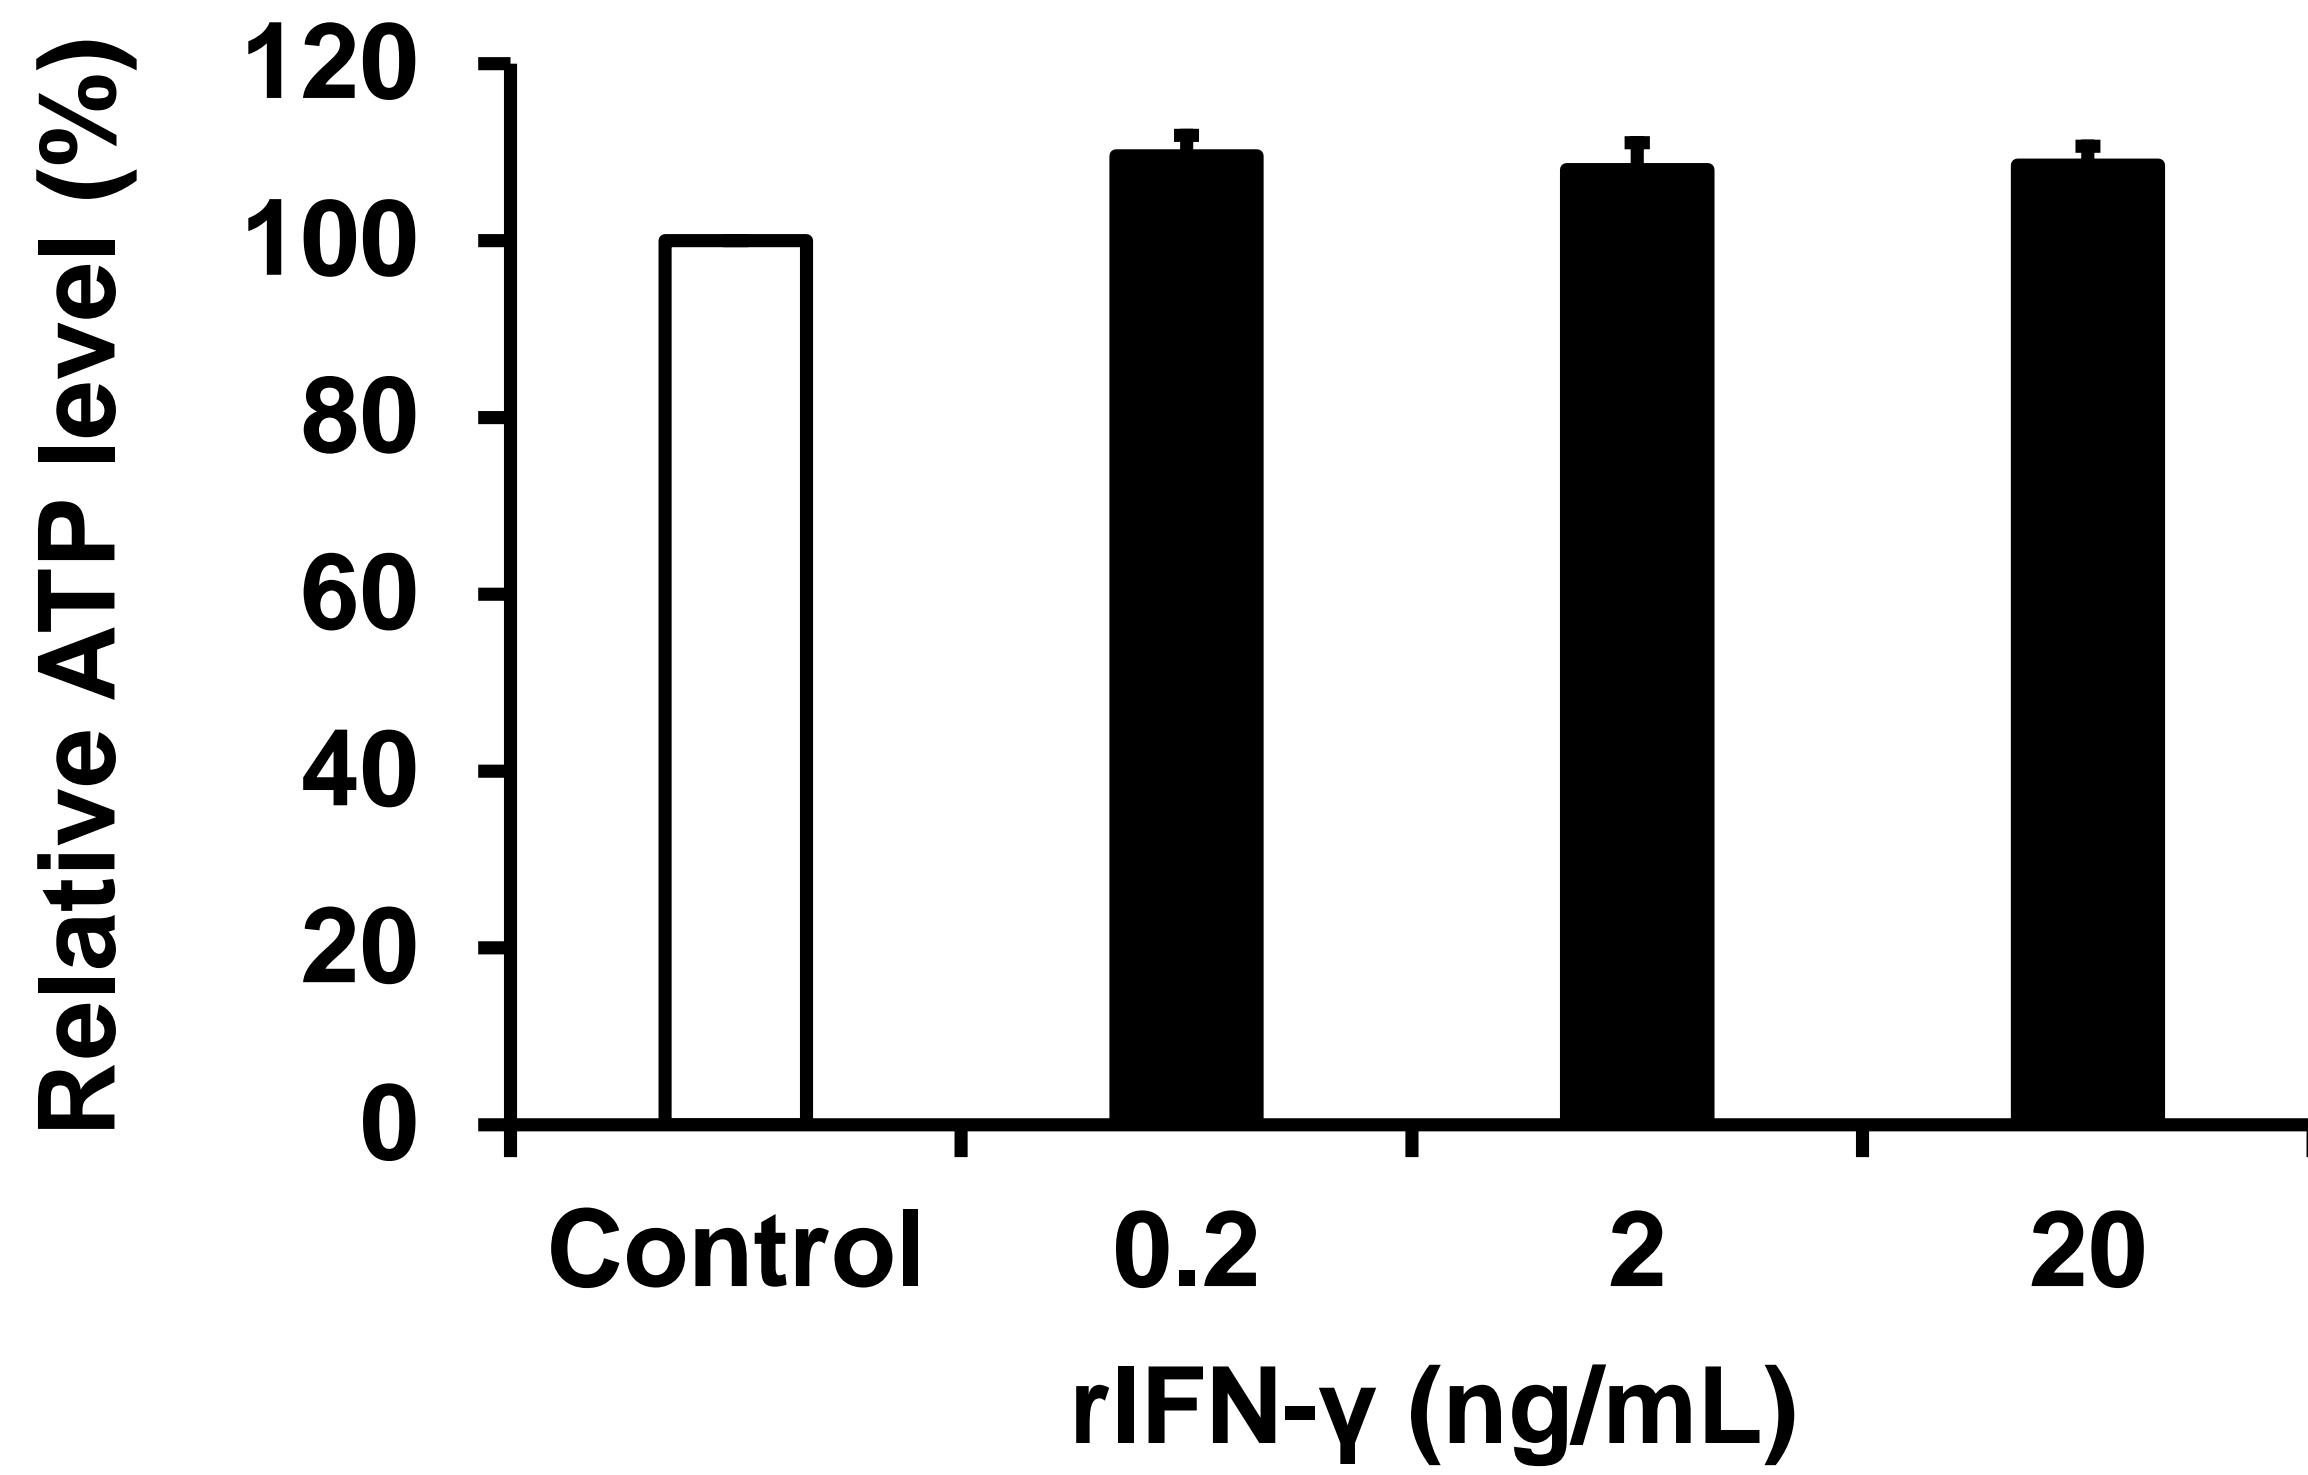



Figure S6

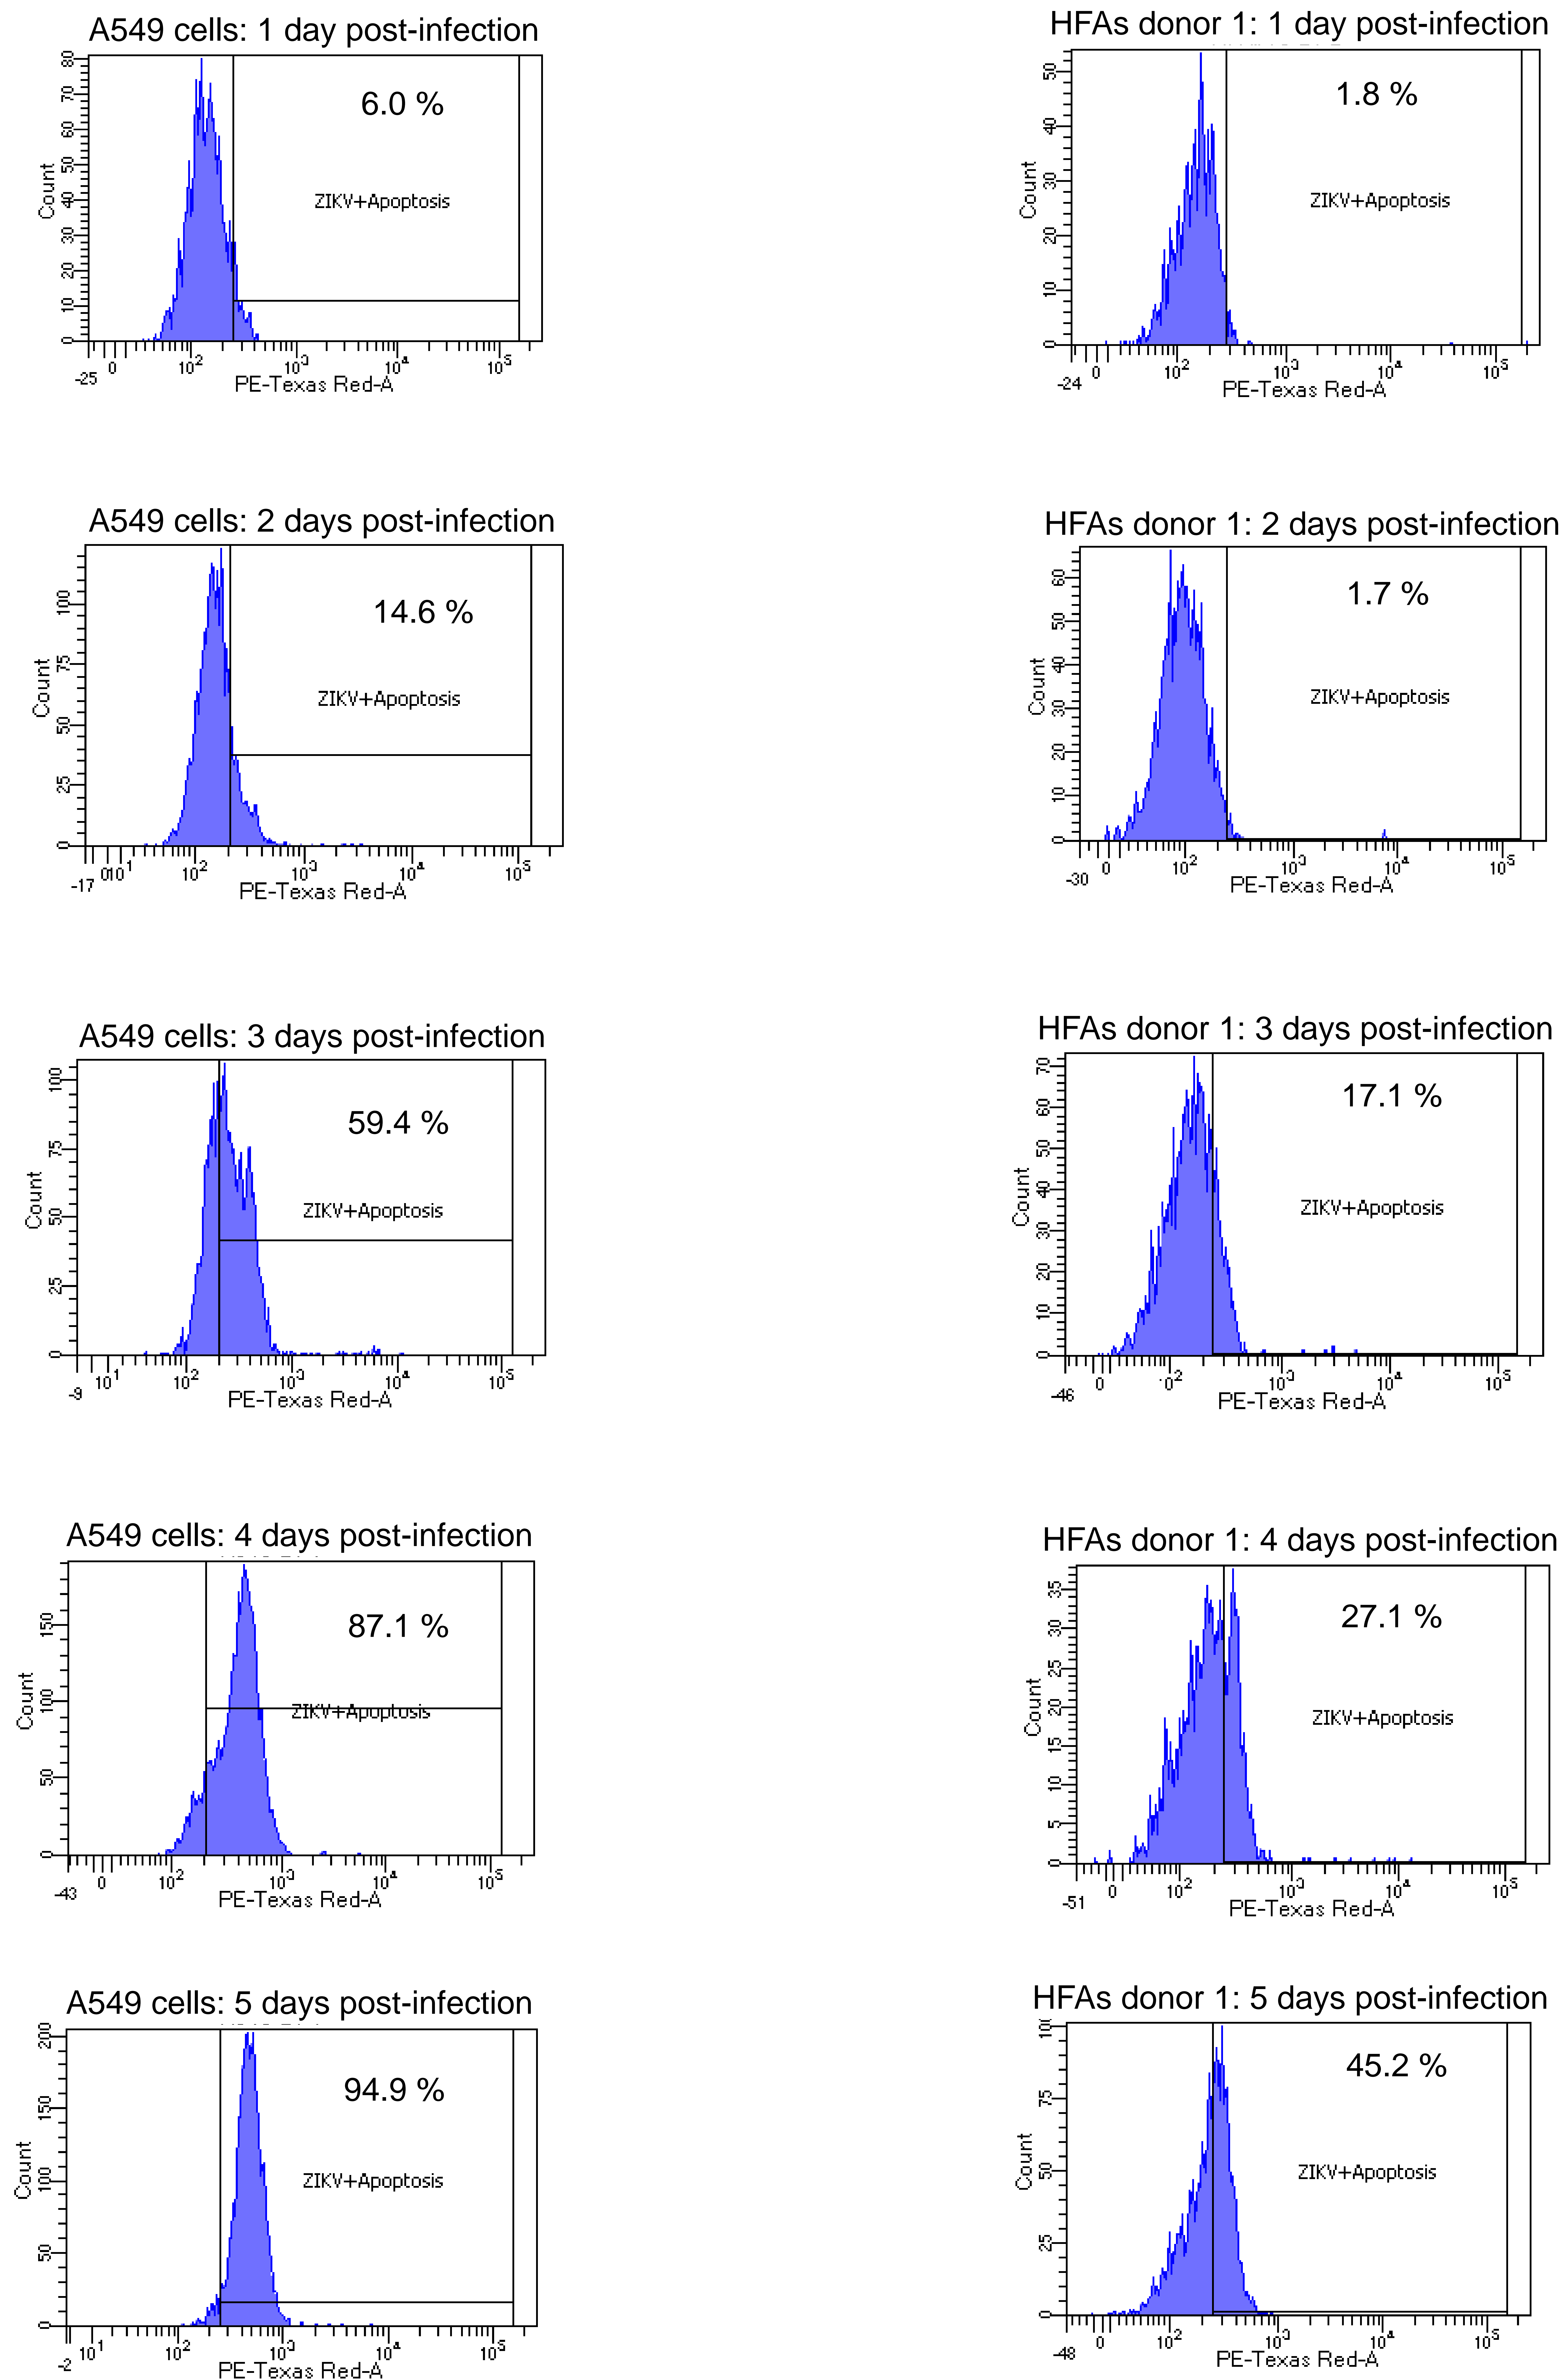



Figure S7

A

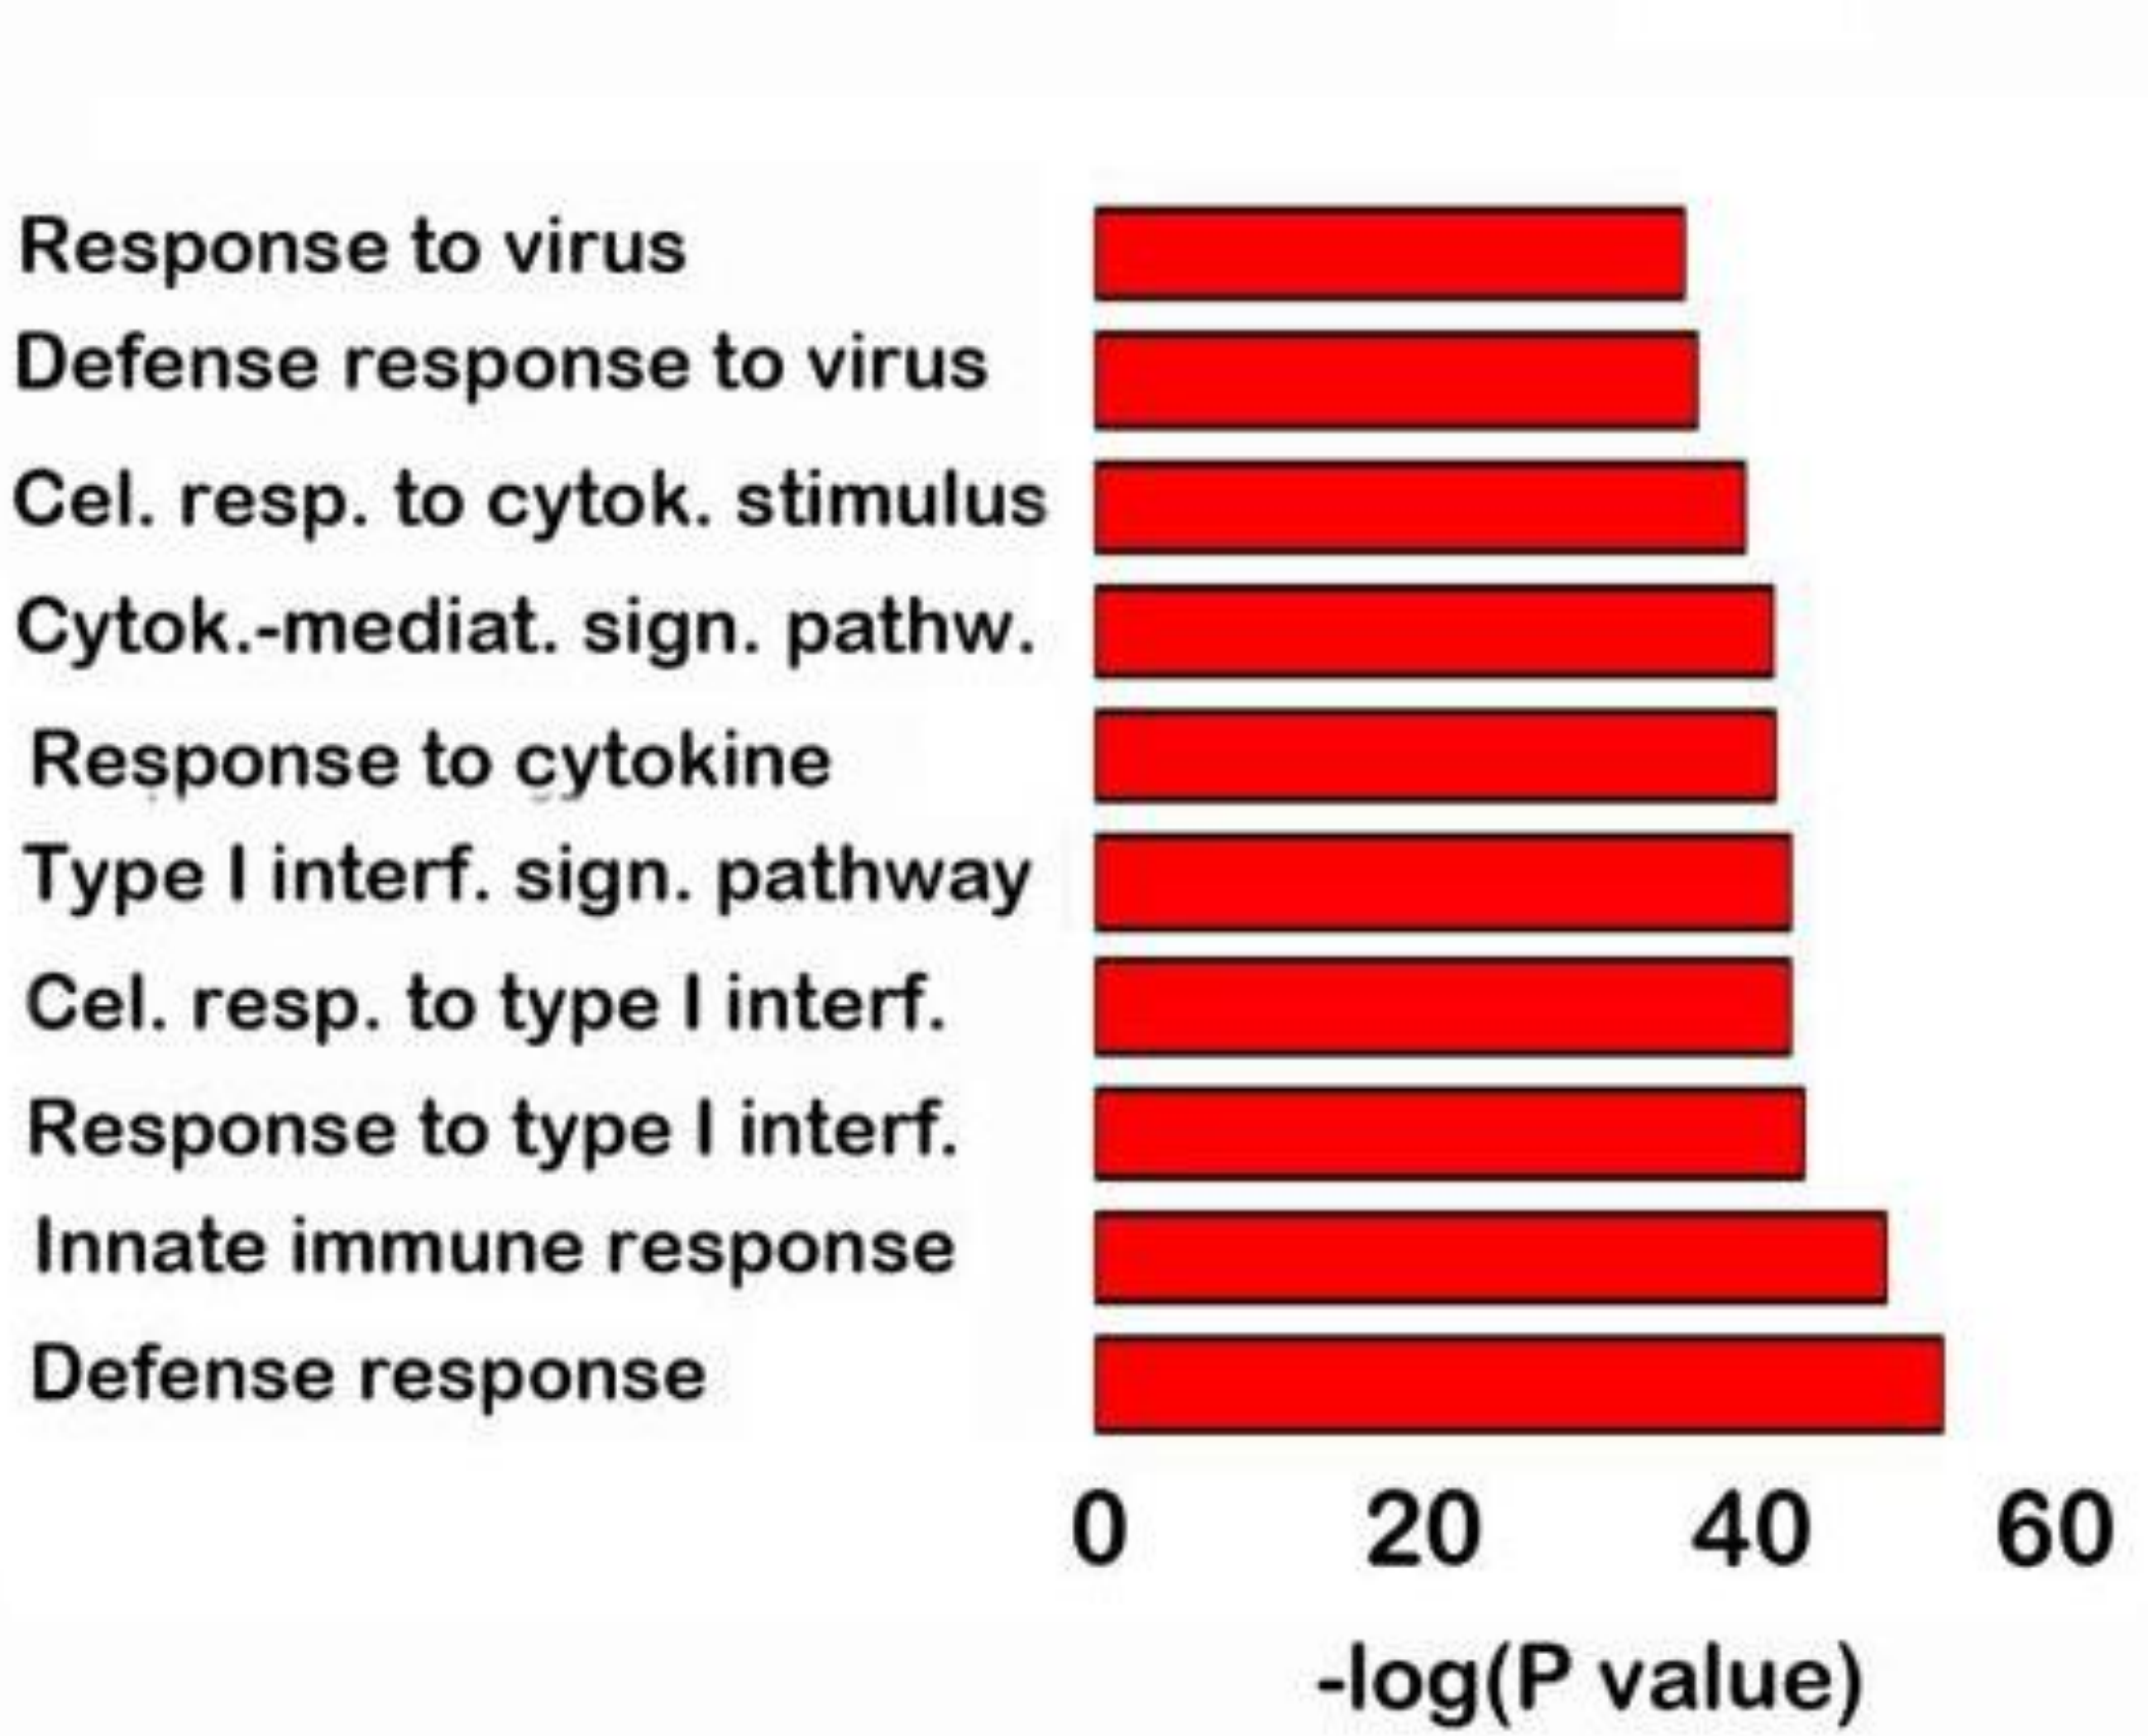

B

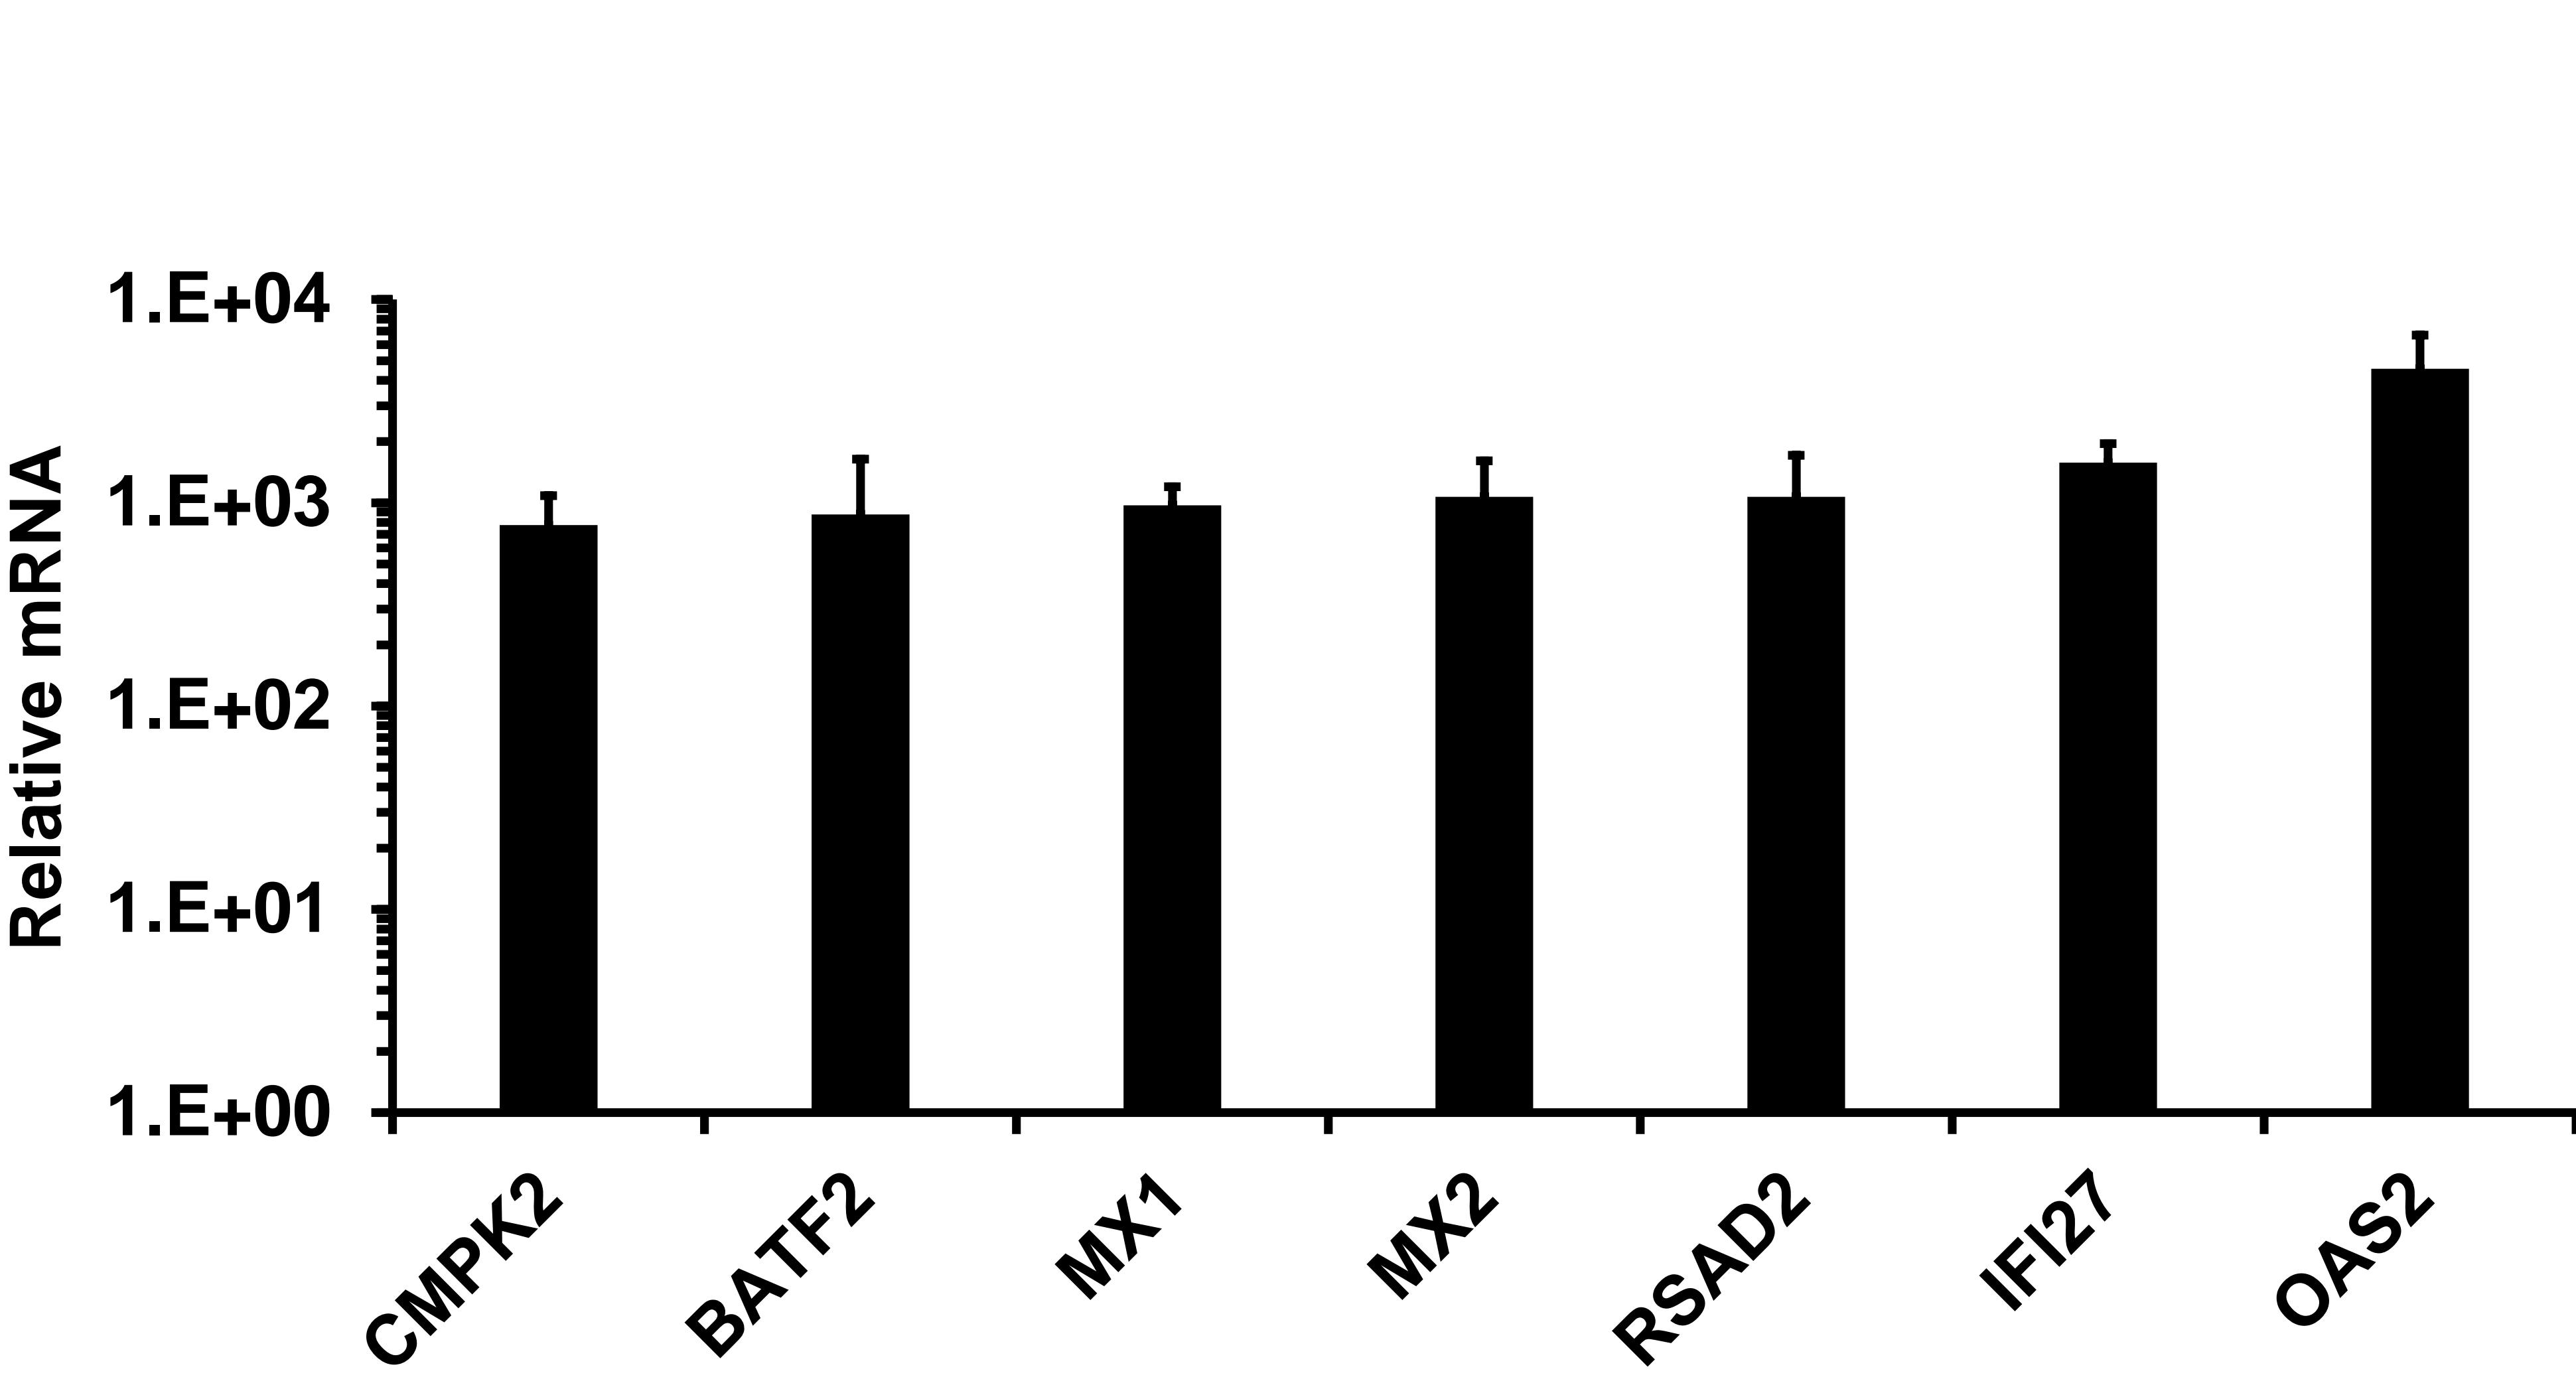



Figure S8

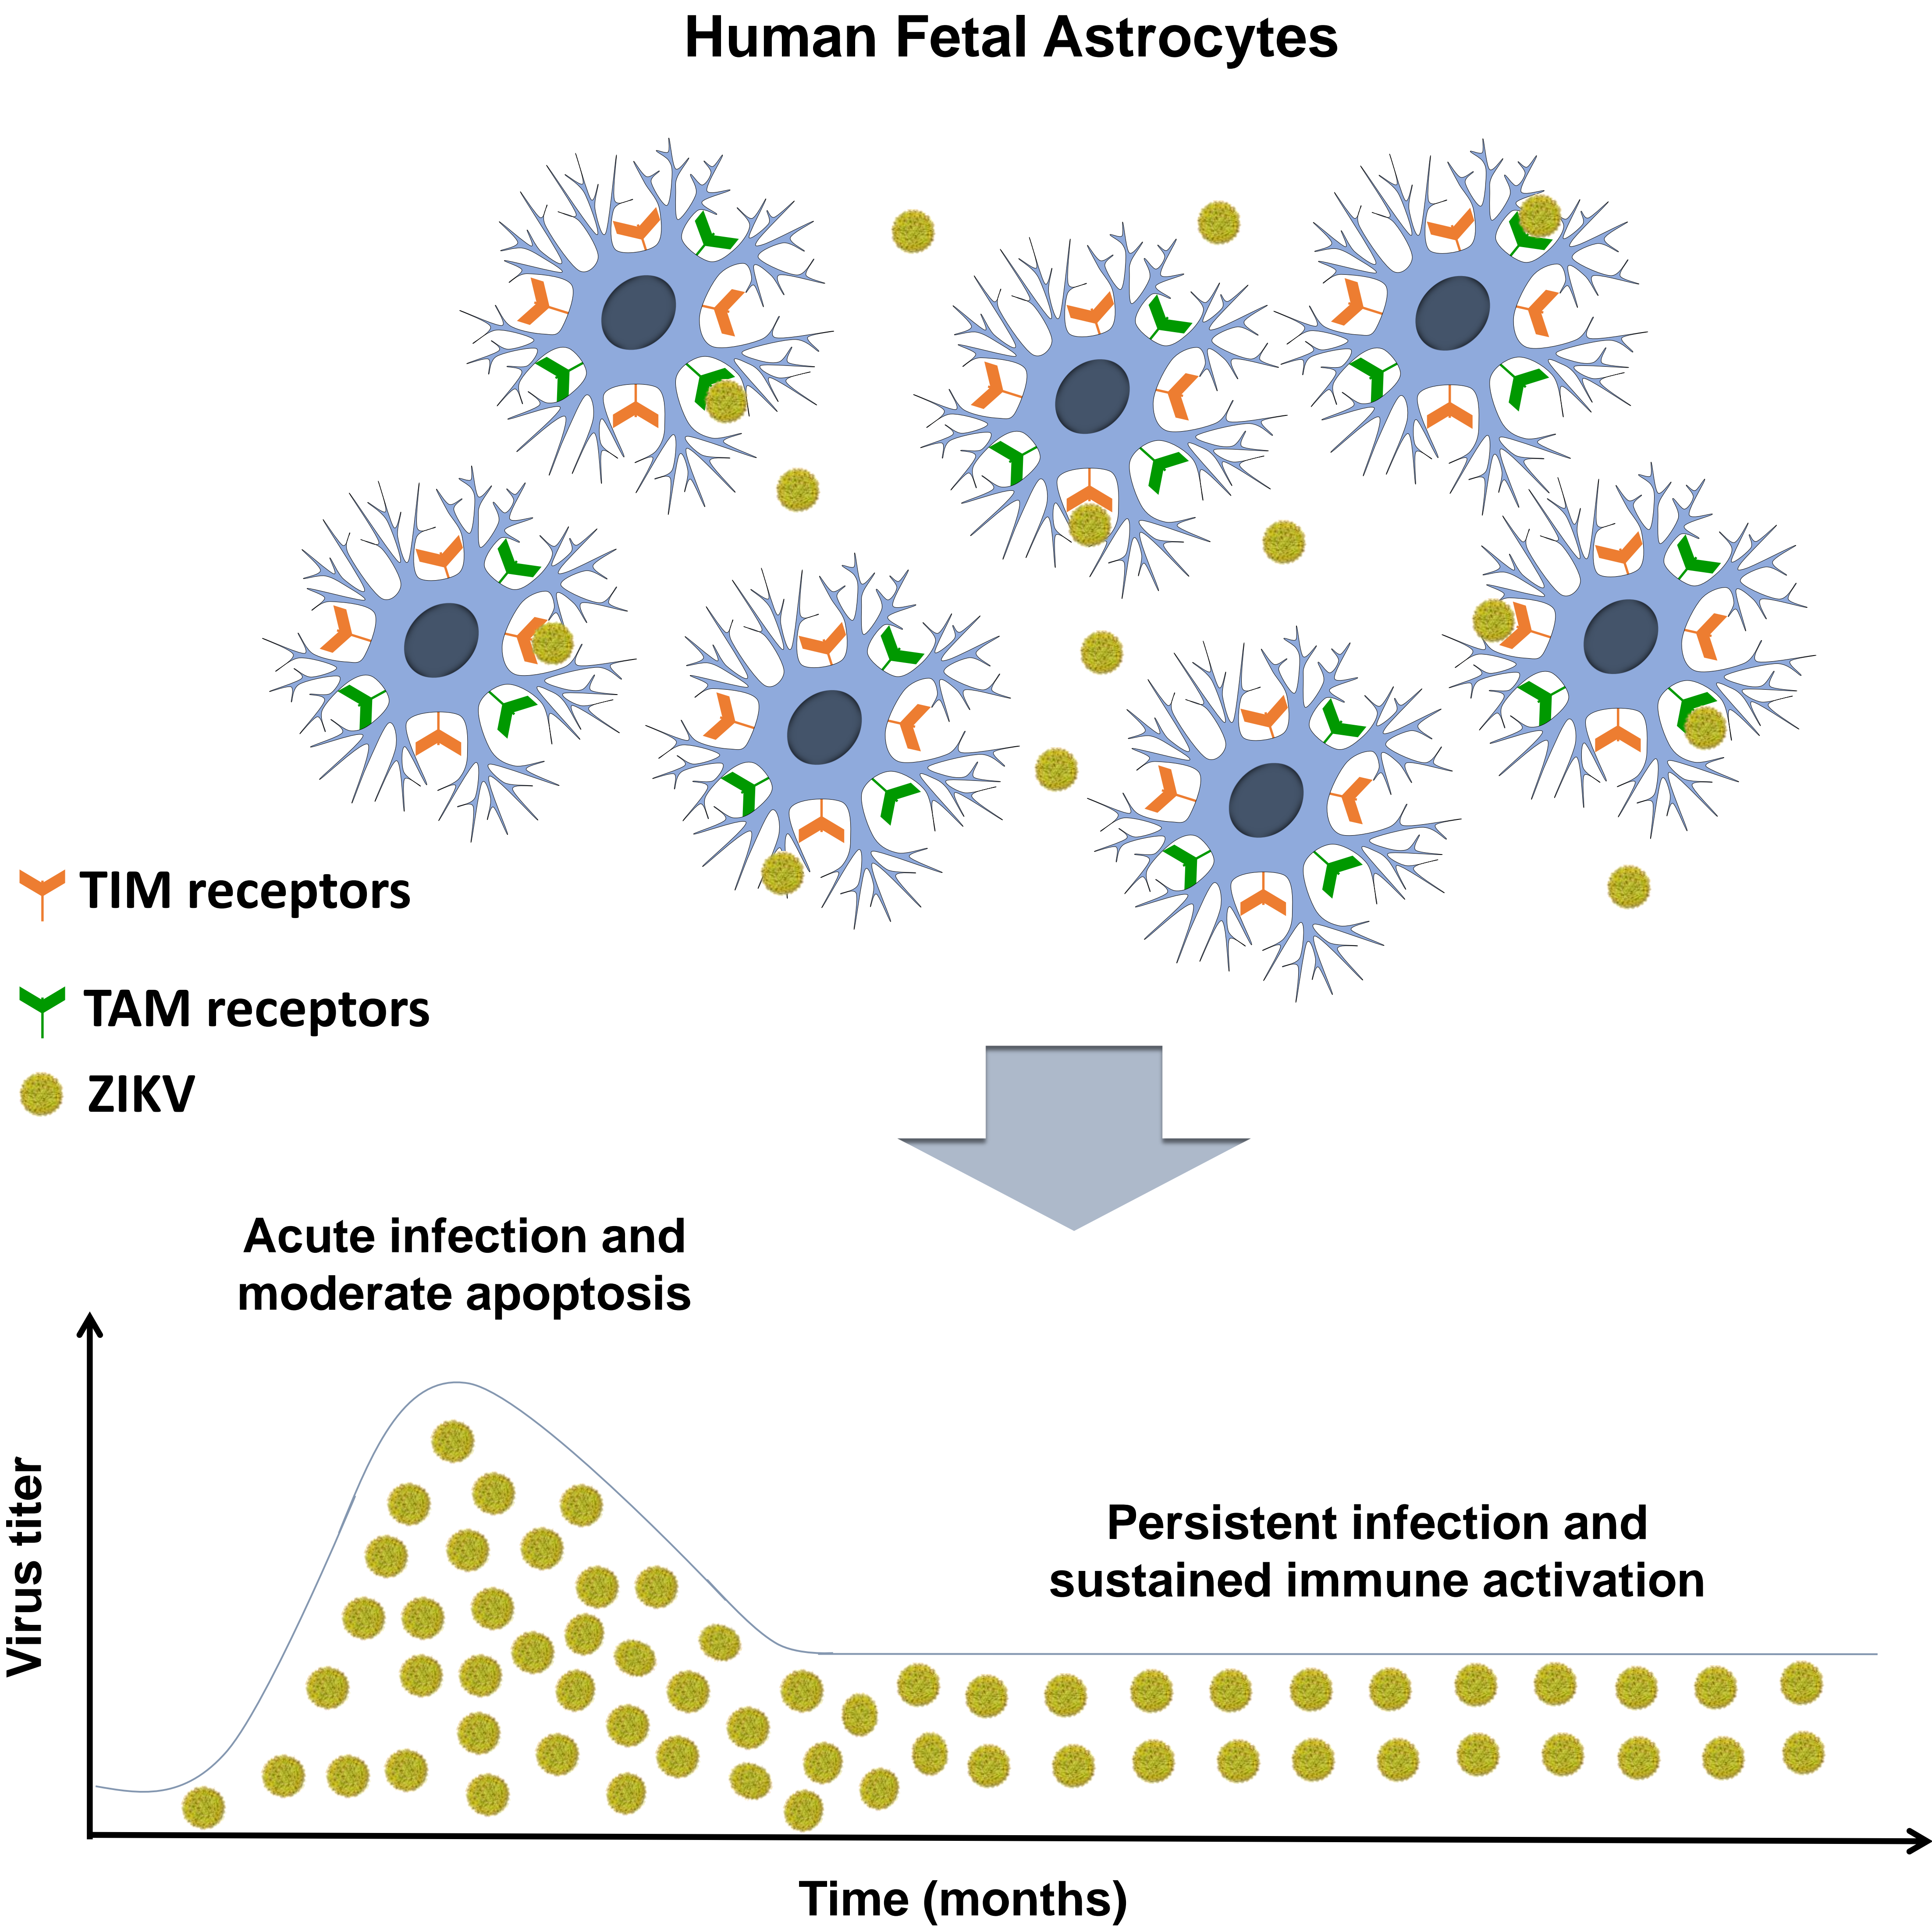

Supplement: s1 [file s1]
